# Supplementary material for: Brain proteomic changes by histone deacetylase inhibition after traumatic brain injury
Source: HighWire-hosted journal article supplement (doi:10.1136/tsaco-2021-000682), 2021-03-01
Supplement: tsaco-2021-000682supp001_data_supplement.xlsx [file tsaco-2021-000682supp001_data_supplement.xlsx]

## Sheet: Sheet1
Identified Proteins (3341)	Accession Number pig	FOLD CHANGE	p value
60S ribosomal protein L6 OS=Sus scrofa OX=9823 GN=RPL6 PE=1 SV=3	sp|Q2YGT9|RL6_PIG	#DIV/0!	6.08181e-08
Isoleucine--tRNA ligase, mitochondrial OS=Sus scrofa OX=9823 GN=IARS2 PE=1 SV=3	tr|F1S9K1|F1S9K1_PIG	#DIV/0!	9.5481e-07
Uncharacterized protein OS=Sus scrofa OX=9823 GN=TXNRD2 PE=1 SV=1	tr|A0A287BQ74|A0A287BQ74_PIG	#DIV/0!	4.4351e-06		Note:
Uncharacterized protein OS=Sus scrofa OX=9823 GN=TECR PE=1 SV=1	tr|A0A287BMG2|A0A287BMG2_PIG	#DIV/0!	4.4351e-06		#DV/0 are proteins only present in TBA+VPA and not in TBI only
Ribosomal protein S15a OS=Sus scrofa OX=9823 GN=RPS15A PE=1 SV=1	tr|A0A287ADE6|A0A287ADE6_PIG	#DIV/0!	4.4351e-06		0 are proteins only present in TBI and not in TBI+VPA
Uncharacterized protein OS=Sus scrofa OX=9823 GN=TMLHE PE=1 SV=1	tr|A0A287AKB1|A0A287AKB1_PIG (+1)	#DIV/0!	4.4351e-06		Fold change >2 are proteins significantly upregulated in TBI+VPA
Leucine carboxyl methyltransferase 1 OS=Sus scrofa OX=9823 GN=LCMT1 PE=1 SV=3	tr|F1RFE3|F1RFE3_PIG	#DIV/0!	4.4351e-06		Fold change <0.5 are proteins significantly down regulated in TBI+VPA
Uncharacterized protein OS=Sus scrofa OX=9823 GN=SCN1B PE=1 SV=1	tr|A0A287AIL6|A0A287AIL6_PIG (+1)	#DIV/0!	4.4351e-06
Ethanolamine-phosphate cytidylyltransferase isoform 1 OS=Sus scrofa OX=9823 GN=PCYT2 PE=4 SV=1	tr|A0A287AL59|A0A287AL59_PIG (+1)	#DIV/0!	4.4351e-06		There are 523 proteins significantly differentially expressed by T-Test
Uncharacterized protein OS=Sus scrofa OX=9823 GN=GPM6B PE=1 SV=3	tr|F1SRH8|F1SRH8_PIG	#DIV/0!	4.4351e-06
Uncharacterized protein OS=Sus scrofa OX=9823 GN=RRAGA PE=4 SV=3	tr|F2Z5Q5|F2Z5Q5_PIG	#DIV/0!	4.4351e-06
Uncharacterized protein OS=Sus scrofa OX=9823 GN=LOC100523526 PE=3 SV=1	tr|I3LMI4|I3LMI4_PIG	#DIV/0!	4.4351e-06
Uncharacterized protein OS=Sus scrofa OX=9823 GN=CUL3 PE=1 SV=1	tr|A0A287A2J9|A0A287A2J9_PIG	#DIV/0!	9.616e-06
Phospholipid-transporting ATPase OS=Sus scrofa OX=9823 GN=ATP8A1 PE=1 SV=1	tr|A0A286ZNQ6|A0A286ZNQ6_PIG (+1)	#DIV/0!	1.93931e-05
Cytochrome c1, heme protein, mitochondrial OS=Sus scrofa OX=9823 GN=CYC1 PE=1 SV=1	tr|A0A287AZF9|A0A287AZF9_PIG	3.39823	2.13495e-05
Citrate synthase, mitochondrial OS=Sus scrofa OX=9823 GN=CS PE=1 SV=2	sp|P00889|CISY_PIG	3.00069	2.49004e-05
Mitochondrial import inner membrane translocase subunit TIM50 OS=Sus scrofa OX=9823 GN=TIMM50 PE=1 SV=1	tr|A0A287AM87|A0A287AM87_PIG (+1)	#DIV/0!	3.25206e-05
Rho-associated protein kinase 2 OS=Sus scrofa OX=9823 GN=ROCK2 PE=1 SV=1	sp|M3TYT0|ROCK2_PIG	#DIV/0!	3.25206e-05
60S ribosomal protein L13a OS=Sus scrofa OX=9823 GN=RPL13A PE=1 SV=1	tr|A0A287B929|A0A287B929_PIG	#DIV/0!	3.25206e-05
Uncharacterized protein OS=Sus scrofa OX=9823 PE=4 SV=1	tr|A0A287AU93|A0A287AU93_PIG	#DIV/0!	4.66552e-05
Adenosine kinase isoform a OS=Sus scrofa OX=9823 GN=ADK PE=1 SV=1	tr|A0A287ASQ2|A0A287ASQ2_PIG (+2)	#DIV/0!	5.15762e-05
Malectin isoform1 OS=Sus scrofa OX=9823 GN=MLEC PE=1 SV=1	tr|F1RJI1|F1RJI1_PIG	#DIV/0!	5.15762e-05
Uncharacterized protein OS=Sus scrofa OX=9823 GN=AGAP3 PE=1 SV=1	tr|A0A287AC08|A0A287AC08_PIG (+1)	#DIV/0!	5.24553e-05
Monoacylglycerol lipase ABHD12 isoform a OS=Sus scrofa OX=9823 GN=ABHD12 PE=1 SV=1	tr|A0A287BMN4|A0A287BMN4_PIG	#DIV/0!	5.24553e-05
Vesicular inhibitory amino acid transporter OS=Sus scrofa OX=9823 GN=SLC32A1 PE=1 SV=1	tr|F1SDX2|F1SDX2_PIG	#DIV/0!	5.24553e-05
Uncharacterized protein OS=Sus scrofa OX=9823 GN=ACTR1B PE=1 SV=3	tr|F1STD5|F1STD5_PIG	#DIV/0!	5.86065e-05
Voltage-gated potassium channel subunit beta-2 isoform 1 OS=Sus scrofa OX=9823 GN=KCNAB2 PE=1 SV=1	tr|A0A286ZW35|A0A286ZW35_PIG	#DIV/0!	6.35245e-05
Long-chain-fatty-acid--CoA ligase 6 isoform X2 OS=Sus scrofa OX=9823 GN=ACSL6 PE=1 SV=1	tr|A0A287BLC7|A0A287BLC7_PIG	#DIV/0!	8.21324e-05
Protein AMBP (Fragment) OS=Sus scrofa OX=9823 GN=AMBP PE=1 SV=2	sp|P04366|AMBP_PIG (+1)	#DIV/0!	9.74199e-05
Sidoreflexin OS=Sus scrofa OX=9823 GN=SFXN5 PE=1 SV=2	tr|F1SLF2|F1SLF2_PIG	#DIV/0!	9.83979e-05
Uncharacterized protein OS=Sus scrofa OX=9823 GN=RYR2 PE=1 SV=3	tr|F1RHM3|F1RHM3_PIG	#DIV/0!	0.000117298
Tyrosine-protein kinase Fyn OS=Sus scrofa OX=9823 GN=FYN PE=2 SV=2	sp|A1Y2K1|FYN_PIG (+2)	#DIV/0!	0.000121664
Uncharacterized protein OS=Sus scrofa OX=9823 GN=RPS6 PE=1 SV=1	tr|A0A287BGN7|A0A287BGN7_PIG (+1)	#DIV/0!	0.000145321
Uncharacterized protein OS=Sus scrofa OX=9823 GN=WDR48 PE=1 SV=2	tr|F2Z5V5|F2Z5V5_PIG	#DIV/0!	0.000145321
Carbonyl reductase family member 4 OS=Sus scrofa OX=9823 GN=CBR4 PE=1 SV=3	tr|F1RIX8|F1RIX8_PIG	#DIV/0!	0.000145321
Transferrin receptor protein 1 OS=Sus scrofa OX=9823 GN=TFRC PE=2 SV=1	sp|Q8HZV3|TFR1_PIG (+3)	#DIV/0!	0.000149503
Synaptotagmin-12 isoform X3 OS=Sus scrofa OX=9823 GN=SYT12 PE=4 SV=2	tr|I3LK76|I3LK76_PIG	#DIV/0!	0.000157764
Uncharacterized protein OS=Sus scrofa OX=9823 GN=DDX3X PE=1 SV=1	tr|A0A287AVQ1|A0A287AVQ1_PIG (+1)	2.44965	0.000193765
Myosin light polypeptide 6 OS=Sus scrofa OX=9823 GN=MYL6 PE=1 SV=2	sp|P60662|MYL6_PIG	0.443142	0.00020006
Phosphate carrier protein, mitochondrial isoform a OS=Sus scrofa OX=9823 GN=SLC25A3 PE=1 SV=1	tr|A0A287BGP7|A0A287BGP7_PIG	3.46436	0.000207322
Uncharacterized protein OS=Sus scrofa OX=9823 GN=VPS45 PE=1 SV=1	tr|A0A287APK1|A0A287APK1_PIG (+1)	#DIV/0!	0.000227076
Maltase-glucoamylase, intestinal OS=Sus scrofa OX=9823 GN=MGAM PE=1 SV=1	tr|A0A287A042|A0A287A042_PIG	#DIV/0!	0.000247318
Uncharacterized protein OS=Sus scrofa OX=9823 GN=SAMM50 PE=1 SV=1	tr|A0A287A9I6|A0A287A9I6_PIG	#DIV/0!	0.000272151
Uncharacterized protein OS=Sus scrofa OX=9823 GN=MPP2 PE=1 SV=1	tr|A0A287AGU8|A0A287AGU8_PIG (+1)	5.60503	0.000280389
Glycogen synthase kinase 3 beta variant 2 OS=Sus scrofa OX=9823 GN=GSK3B PE=1 SV=1	tr|I6YP72|I6YP72_PIG (+1)	#DIV/0!	0.000300539
Succinate dehydrogenase cytochrome b560 subunit, mitochondrial OS=Sus scrofa OX=9823 GN=SDHC PE=1 SV=2	sp|D0VWV4|C560_PIG (+1)	#DIV/0!	0.000317491
40S ribosomal protein S24 OS=Sus scrofa OX=9823 GN=RPS24 PE=3 SV=1	tr|A0A287ACL6|A0A287ACL6_PIG (+2)	#DIV/0!	0.000317491
Isoleucine--tRNA ligase, cytoplasmic OS=Sus scrofa OX=9823 GN=IARS PE=1 SV=3	tr|F1SUF6|F1SUF6_PIG (+1)	#DIV/0!	0.000325936
Uncharacterized protein OS=Sus scrofa OX=9823 GN=WDR13 PE=1 SV=2	tr|I3LPL0|I3LPL0_PIG	#DIV/0!	0.000325936
40S ribosomal protein S8 OS=Sus scrofa OX=9823 GN=RPS8 PE=1 SV=3	tr|F2Z5F5|F2Z5F5_PIG	#DIV/0!	0.000341026
AP-1 complex subunit gamma OS=Sus scrofa OX=9823 GN=AP1G1 PE=1 SV=3	tr|F1S3C7|F1S3C7_PIG	#DIV/0!	0.000355602
Uncharacterized protein OS=Sus scrofa OX=9823 GN=SERPINA3-2 PE=1 SV=1	tr|F6Q469|F6Q469_PIG	3.74741	0.000397619
Uncharacterized protein OS=Sus scrofa OX=9823 GN=COPZ1 PE=1 SV=1	tr|A0A286ZP62|A0A286ZP62_PIG	#DIV/0!	0.000409252
Uncharacterized protein OS=Sus scrofa OX=9823 GN=TMEM33 PE=1 SV=1	tr|A0A287BES3|A0A287BES3_PIG	#DIV/0!	0.000409252
Ubiquinol-cytochrome c reductase complex OS=Sus scrofa OX=9823 GN=UQCR10 PE=1 SV=1	tr|Q2EN79|Q2EN79_PIG	#DIV/0!	0.000409252
Uncharacterized protein OS=Sus scrofa OX=9823 GN=AP2M1 PE=1 SV=1	tr|A0A286ZU22|A0A286ZU22_PIG	3.08826	0.000464783
NADH-cytochrome b5 reductase OS=Sus scrofa OX=9823 GN=CYB5R1 PE=1 SV=2	tr|F1S4N2|F1S4N2_PIG	#DIV/0!	0.000496257
Uncharacterized protein OS=Sus scrofa OX=9823 GN=NT5E PE=1 SV=1	tr|K7GSR6|K7GSR6_PIG	#DIV/0!	0.000496257
Uncharacterized protein OS=Sus scrofa OX=9823 GN=KLKB1 PE=1 SV=3	tr|F1RZN7|F1RZN7_PIG	#DIV/0!	0.000503736
Metaxin-3 isoform X1 OS=Sus scrofa OX=9823 GN=MTX3 PE=1 SV=1	tr|A0A287AMT3|A0A287AMT3_PIG (+1)	#DIV/0!	0.000515469
NCK-interacting protein with SH3 domain isoform 2 OS=Sus scrofa OX=9823 GN=NCKIPSD PE=1 SV=3	tr|F1SKK3|F1SKK3_PIG	#DIV/0!	0.000515469
Kininogen-1 isoform 1 OS=Sus scrofa OX=9823 GN=KNG1 PE=1 SV=3	tr|F1SFI4|F1SFI4_PIG	6.64166	0.000596246
Eukaryotic translation initiation factor 2 subunit 3 OS=Sus scrofa OX=9823 GN=EIF2S3 PE=1 SV=1	tr|I3LUM9|I3LUM9_PIG	#DIV/0!	0.00061625
Uncharacterized protein OS=Sus scrofa OX=9823 GN=GABBR1 PE=1 SV=2	tr|K7GP86|K7GP86_PIG	#DIV/0!	0.000647758
Uncharacterized protein OS=Sus scrofa OX=9823 GN=ARMT1 PE=1 SV=3	tr|F1S7W3|F1S7W3_PIG	#DIV/0!	0.000647758
Uncharacterized protein OS=Sus scrofa OX=9823 GN=LOC100153899 PE=1 SV=1	tr|A0A287AT48|A0A287AT48_PIG	#DIV/0!	0.000655226
2-oxoglutarate dehydrogenase, mitochondrial OS=Sus scrofa OX=9823 GN=OGDH PE=1 SV=1	tr|K9IVI1|K9IVI1_PIG	3.81413	0.000679567
Microsomal glutathione S-transferase 3 OS=Sus scrofa OX=9823 GN=MGST3 PE=1 SV=1	tr|Q2EN77|Q2EN77_PIG	#DIV/0!	0.00068466
Uncharacterized protein OS=Sus scrofa OX=9823 GN=CPT1A PE=1 SV=3	tr|F1RY67|F1RY67_PIG	#DIV/0!	0.000703131
Cytoplasmic FMR1-interacting protein OS=Sus scrofa OX=9823 GN=CYFIP2 PE=1 SV=1	tr|A0A287BRC0|A0A287BRC0_PIG	6.6515	0.000740328
Uncharacterized protein OS=Sus scrofa OX=9823 GN=GNB5 PE=1 SV=2	tr|I3LLQ2|I3LLQ2_PIG	11.9772	0.000752405
Uncharacterized protein OS=Sus scrofa OX=9823 GN=PTDSS1 PE=4 SV=1	tr|A0A287AEC9|A0A287AEC9_PIG	#DIV/0!	0.000753271
Uncharacterized protein OS=Sus scrofa OX=9823 GN=HECTD4 PE=1 SV=1	tr|A0A287AVG0|A0A287AVG0_PIG	#DIV/0!	0.000753271
Uncharacterized protein OS=Sus scrofa OX=9823 GN=DST PE=1 SV=1	tr|A0A287BAP9|A0A287BAP9_PIG	#DIV/0!	0.000753271
Uncharacterized protein OS=Sus scrofa OX=9823 GN=WDR7 PE=1 SV=1	tr|A0A287BCP8|A0A287BCP8_PIG	#DIV/0!	0.000754038
Uncharacterized protein OS=Sus scrofa OX=9823 GN=CCNY PE=1 SV=3	tr|F1RUR3|F1RUR3_PIG	#DIV/0!	0.000768056
Uncharacterized protein OS=Sus scrofa OX=9823 GN=CLASP1 PE=1 SV=2	tr|I3LCL0|I3LCL0_PIG	#DIV/0!	0.000768056
AP complex subunit sigma OS=Sus scrofa OX=9823 GN=AP3S1 PE=3 SV=1	tr|A0A288CG05|A0A288CG05_PIG	#DIV/0!	0.000768056
GTP-binding protein Di-Ras2 OS=Sus scrofa OX=9823 GN=DIRAS2 PE=1 SV=1	tr|A0A287AKH0|A0A287AKH0_PIG	4.13816	0.000770915
NADH dehydrogenase ubiquinone 1 alpha subcomplex subunit 9, mitochondrial OS=Sus scrofa OX=9823 GN=NDUFA9 PE=1 SV=2	tr|F1SL07|F1SL07_PIG	4.6858	0.000774522
Uncharacterized protein OS=Sus scrofa OX=9823 GN=AIFM1 PE=4 SV=1	tr|F1RTH3|F1RTH3_PIG	11.0108	0.000816818
Uncharacterized protein OS=Sus scrofa OX=9823 GN=SEC24C PE=1 SV=1	tr|A0A286ZQ28|A0A286ZQ28_PIG (+1)	#DIV/0!	0.000864166
Omega-amidase NIT2 OS=Sus scrofa OX=9823 GN=NIT2 PE=1 SV=3	tr|F1SKY2|F1SKY2_PIG	1.63678	0.000880148
Uncharacterized protein OS=Sus scrofa OX=9823 GN=OGDHL PE=1 SV=3	tr|F1SDW6|F1SDW6_PIG	#DIV/0!	0.000887238
Uncharacterized protein OS=Sus scrofa OX=9823 GN=VPS50 PE=4 SV=1	tr|A0A286ZI89|A0A286ZI89_PIG (+2)	#DIV/0!	0.000889509
Uncharacterized protein OS=Sus scrofa OX=9823 GN=UNC13A PE=4 SV=1	tr|A0A286ZJ34|A0A286ZJ34_PIG (+1)	#DIV/0!	0.000889509
Constitutive coactivator of PPAR-gamma-like protein 1 isoform b OS=Sus scrofa OX=9823 GN=FAM120A PE=1 SV=1	tr|A0A287AI94|A0A287AI94_PIG	#DIV/0!	0.000889509
Uncharacterized protein OS=Sus scrofa OX=9823 GN=GRM2 PE=1 SV=3	tr|F1SIZ5|F1SIZ5_PIG	#DIV/0!	0.000889509
Uncharacterized protein OS=Sus scrofa OX=9823 GN=DNAJB4 PE=1 SV=2	tr|F1S9T0|F1S9T0_PIG	#DIV/0!	0.000889509
Dihydrolipoamide acetyltransferase component of pyruvate dehydrogenase complex OS=Sus scrofa OX=9823 GN=DBT PE=1 SV=1	tr|A0A286ZZ34|A0A286ZZ34_PIG	#DIV/0!	0.000889509
Uncharacterized protein OS=Sus scrofa OX=9823 GN=NBEA PE=1 SV=1	tr|A0A287B1J9|A0A287B1J9_PIG	#DIV/0!	0.000889509
Uncharacterized protein OS=Sus scrofa OX=9823 GN=NF1 PE=1 SV=3	tr|F1RJ58|F1RJ58_PIG	#DIV/0!	0.000889509
Histone H2A OS=Sus scrofa OX=9823 GN=H2A.Z PE=2 SV=1	tr|B1PEY3|B1PEY3_PIG (+1)	#DIV/0!	0.000938798
Sulfide:quinone oxidoreductase, mitochondrial OS=Sus scrofa OX=9823 GN=SQOR PE=1 SV=3	tr|F1SN58|F1SN58_PIG	#DIV/0!	0.000961488
Thyroxine-binding globulin OS=Sus scrofa OX=9823 GN=SERPINA7 PE=2 SV=2	sp|Q9TT35|THBG_PIG (+1)	#DIV/0!	0.000991452
Choline transporter-like protein 2 OS=Sus scrofa OX=9823 GN=SLC44A2 PE=3 SV=1	tr|A0A2C9F3E8|A0A2C9F3E8_PIG	#DIV/0!	0.000995516
Uncharacterized protein OS=Sus scrofa OX=9823 GN=STK39 PE=1 SV=2	tr|I3LF98|I3LF98_PIG (+1)	#DIV/0!	0.000995516
Ubiquitin carboxyl-terminal hydrolase 46 isoform 1 OS=Sus scrofa OX=9823 GN=USP46 PE=3 SV=1	tr|A0A287B0Z4|A0A287B0Z4_PIG	#DIV/0!	0.000995516
Uncharacterized protein OS=Sus scrofa OX=9823 PE=4 SV=1	tr|A0A287A1J6|A0A287A1J6_PIG	4.54521	0.001015
6-phosphofructokinase OS=Sus scrofa OX=9823 GN=PFKL PE=1 SV=1	tr|A0A286ZZL7|A0A286ZZL7_PIG (+1)	#DIV/0!	0.00109029
6-phosphofructokinase OS=Sus scrofa OX=9823 GN=PFKL PE=1 SV=2
Calcium-transporting ATPase OS=Sus scrofa OX=9823 GN=ATP2B2 PE=1 SV=1	tr|A0A286ZVU9|A0A286ZVU9_PIG (+2)	#DIV/0!	0.00112906
Uncharacterized protein OS=Sus scrofa OX=9823 GN=ADIPOQ PE=1 SV=1	tr|A0A287AHI7|A0A287AHI7_PIG	#DIV/0!	0.00114333
Uncharacterized protein OS=Sus scrofa OX=9823 GN=SYT1 PE=1 SV=1	tr|A0A287A9J7|A0A287A9J7_PIG (+1)	4.60942	0.00116099
Retinal dehydrogenase 1 OS=Sus scrofa OX=9823 GN=ALDH1A1 PE=1 SV=2	tr|I3LRS5|I3LRS5_PIG	#DIV/0!	0.00117323
Methylmalonate-semialdehyde dehydrogenase acylating, mitochondrial isoform 1 OS=Sus scrofa OX=9823 GN=ALDH6A1 PE=1 SV=2	tr|F1S3H1|F1S3H1_PIG	3.14531	0.00118065
Uncharacterized protein OS=Sus scrofa OX=9823 GN=CRTAC1 PE=4 SV=1	tr|A0A287AL17|A0A287AL17_PIG (+3)	#DIV/0!	0.00133235
Uncharacterized protein OS=Sus scrofa OX=9823 GN=RASA1 PE=1 SV=1	tr|A0A287A3J8|A0A287A3J8_PIG	#DIV/0!	0.00133235
Uncharacterized protein OS=Sus scrofa OX=9823 GN=GORASP2 PE=1 SV=3	tr|F1S1U5|F1S1U5_PIG	#DIV/0!	0.00133235
NADH-ubiquinone oxidoreductase chain 1 OS=Sus scrofa OX=9823 GN=MT-ND1 PE=1 SV=1	sp|O79874|NU1M_PIG (+1)	#DIV/0!	0.00134282
Mitochondrial translocase of outer membrane protein OS=Sus scrofa OX=9823 GN=TOMM40 PE=1 SV=1	tr|D0V557|D0V557_PIG	#DIV/0!	0.00134282
Mitochondrial translocase of outer membrane protein OS=Sus scrofa OX=9823 GN=TOMM40 PE=1 SV=2
Mitochondrial translocase of outer membrane protein OS=Sus scrofa OX=9823 GN=TOMM40 PE=1 SV=3
Mitochondrial translocase of outer membrane protein OS=Sus scrofa OX=9823 GN=TOMM40 PE=1 SV=4
Mitochondrial translocase of outer membrane protein OS=Sus scrofa OX=9823 GN=TOMM40 PE=1 SV=5
Uncharacterized protein OS=Sus scrofa OX=9823 GN=D2HGDH PE=1 SV=1	tr|A0A286ZPL6|A0A286ZPL6_PIG (+1)	#DIV/0!	0.00134282
Eukaryotic translation initiation factor 3 subunit A OS=Sus scrofa OX=9823 GN=EIF3A PE=1 SV=2	tr|F1S4P6|F1S4P6_PIG	#DIV/0!	0.00134282
Electron transfer flavoprotein-ubiquinone oxidoreductase, mitochondrial OS=Sus scrofa OX=9823 GN=ETFDH PE=1 SV=1	tr|A0A286ZXI8|A0A286ZXI8_PIG (+3)	#DIV/0!	0.0013502
Uncharacterized protein OS=Sus scrofa OX=9823 GN=CASK PE=1 SV=2	tr|K7GSB2|K7GSB2_PIG	#DIV/0!	0.0013502
Uncharacterized protein OS=Sus scrofa OX=9823 GN=GABRA1 PE=1 SV=3	tr|F1RR71|F1RR71_PIG	#DIV/0!	0.00137242
Uncharacterized protein OS=Sus scrofa OX=9823 GN=NCKAP1 PE=1 SV=1	tr|A0A287AJY4|A0A287AJY4_PIG	9.39332	0.00139032
Mitochondrial import receptor subunit TOM70 OS=Sus scrofa OX=9823 GN=TOMM70 PE=1 SV=3	tr|F1SKZ8|F1SKZ8_PIG	3.15565	0.00145742
Uncharacterized protein OS=Sus scrofa OX=9823 GN=GRIA2 PE=1 SV=1	tr|A0A287AMC2|A0A287AMC2_PIG	19.1107	0.00158373
Uncharacterized protein OS=Sus scrofa OX=9823 PE=4 SV=1	tr|A0A287ALC1|A0A287ALC1_PIG	#DIV/0!	0.00160375
Ganglioside-induced differentiation-associated protein 1-like 1 isoform 2 OS=Sus scrofa OX=9823 GN=GDAP1L1 PE=1 SV=3	tr|F1SDS5|F1SDS5_PIG	#DIV/0!	0.0016163
CDGSH iron sulfur domain 1 OS=Sus scrofa OX=9823 GN=CISD1 PE=2 SV=1	tr|X5FUA3|X5FUA3_PIG	16.2676	0.00164175
Uncharacterized protein OS=Sus scrofa OX=9823 GN=CLNS1A PE=1 SV=2	tr|F1STY9|F1STY9_PIG	0	0.00170731
AP-2 complex subunit alpha OS=Sus scrofa OX=9823 GN=AP2A1 PE=1 SV=2	tr|F1RH60|F1RH60_PIG (+1)	2.01455	0.00172361
AP-2 complex subunit alpha OS=Sus scrofa OX=9823 GN=AP2A1 PE=1 SV=3
AP-3 complex subunit delta-1 isoform 3 OS=Sus scrofa OX=9823 GN=AP3D1 PE=1 SV=1	tr|M3VK02|M3VK02_PIG	14.3328	0.00175221
Glutamate receptor 3 isoform 1 OS=Sus scrofa OX=9823 GN=GRIA3 PE=3 SV=2	tr|K7GPI4|K7GPI4_PIG	#DIV/0!	0.00178562
Histone H2A OS=Sus scrofa OX=9823 GN=H2AFJ PE=3 SV=1	tr|A0A287ANS6|A0A287ANS6_PIG (+3)	0	0.00178786
Calcium-binding mitochondrial carrier protein Aralar1 OS=Sus scrofa OX=9823 GN=SLC25A12 PE=1 SV=3	tr|F1S086|F1S086_PIG	3.36902	0.00181188
Protein kinase C OS=Sus scrofa OX=9823 GN=PRKCB_tv2 PE=1 SV=1	tr|K9J4L8|K9J4L8_PIG	2.74757	0.00182906
Uncharacterized protein OS=Sus scrofa OX=9823 GN=PACS1 PE=1 SV=1	tr|A0A287BMC4|A0A287BMC4_PIG (+1)	#DIV/0!	0.00186525
Uncharacterized protein OS=Sus scrofa OX=9823 GN=ABR PE=1 SV=1	tr|A0A287A0G2|A0A287A0G2_PIG (+1)	4.85442	0.00191638
Aspartate aminotransferase OS=Sus scrofa OX=9823 GN=GOT2 PE=1 SV=1	tr|A0A287A044|A0A287A044_PIG	2.11834	0.00198481
Uncharacterized protein OS=Sus scrofa OX=9823 GN=SYT2 PE=4 SV=3	tr|F1S5A0|F1S5A0_PIG	#DIV/0!	0.00200386
Anion exchange protein OS=Sus scrofa OX=9823 GN=SLC4A10 PE=1 SV=1	tr|A0A287AGF6|A0A287AGF6_PIG	#DIV/0!	0.00202978
Uncharacterized protein OS=Sus scrofa OX=9823 PE=1 SV=1	tr|A0A287AFB0|A0A287AFB0_PIG	#DIV/0!	0.00206595
Arp2/3 complex 34 kDa subunit OS=Sus scrofa OX=9823 GN=ARPC2 PE=1 SV=3	tr|F1SS01|F1SS01_PIG	3.73475	0.0020669
Mitochondrial Rho GTPase OS=Sus scrofa OX=9823 GN=RHOT1 PE=1 SV=1	tr|A0A286ZWW1|A0A286ZWW1_PIG	10.2172	0.00210932
Mitochondrial Rho GTPase OS=Sus scrofa OX=9823 GN=RHOT1 PE=1 SV=2
40S ribosomal protein S3 OS=Sus scrofa OX=9823 GN=RPS3 PE=1 SV=1	sp|Q0Z8U2|RS3_PIG	13.3887	0.00212711
Uncharacterized protein OS=Sus scrofa OX=9823 PE=4 SV=1	tr|A0A286ZV86|A0A286ZV86_PIG	3.30414	0.0021831
Leukocyte surface antigen CD47 OS=Sus scrofa OX=9823 GN=CD47 PE=1 SV=1	tr|A0A286ZZK2|A0A286ZZK2_PIG (+2)	10.1487	0.00236072
Uncharacterized protein OS=Sus scrofa OX=9823 GN=DNM1 PE=1 SV=2	tr|I3LCZ7|I3LCZ7_PIG	1.80154	0.00242653
Protein VAC14 homolog OS=Sus scrofa OX=9823 GN=VAC14 PE=1 SV=3	tr|F1S3E8|F1S3E8_PIG	#DIV/0!	0.00248945
Retinol-binding protein 4 OS=Sus scrofa OX=9823 GN=RBP4 PE=1 SV=2	sp|P27485|RET4_PIG (+1)	#DIV/0!	0.00253362
Pyruvate dehydrogenase kinase, isozyme 3 isoform 1 OS=Sus scrofa OX=9823 GN=PDK3 PE=1 SV=1	tr|A0A287AHT1|A0A287AHT1_PIG	#DIV/0!	0.00253362
Uncharacterized protein OS=Sus scrofa OX=9823 GN=SFXN4 PE=4 SV=2	tr|F1S4N5|F1S4N5_PIG	#DIV/0!	0.00253362
Clathrin heavy chain OS=Sus scrofa OX=9823 GN=CLTC PE=1 SV=2	tr|I3LGD4|I3LGD4_PIG	2.38386	0.00256486
Clathrin heavy chain OS=Sus scrofa OX=9823 GN=CLTC PE=1 SV=3
Amino acid transporter OS=Sus scrofa OX=9823 GN=SLC1A3 PE=1 SV=3	tr|F1SNA0|F1SNA0_PIG	2.43017	0.00263783
Pyruvate carboxylase OS=Sus scrofa OX=9823 GN=PC PE=1 SV=3	tr|F1RUV5|F1RUV5_PIG	2.44261	0.00263941
Uncharacterized protein OS=Sus scrofa OX=9823 GN=ITSN1 PE=1 SV=1	tr|A0A287A536|A0A287A536_PIG	#DIV/0!	0.00264836
Uncharacterized protein OS=Sus scrofa OX=9823 GN=SMYD5 PE=1 SV=1	tr|A0A286ZK25|A0A286ZK25_PIG	#DIV/0!	0.00264836
Uncharacterized protein OS=Sus scrofa OX=9823 GN=PRKCA PE=1 SV=3	tr|F1RV14|F1RV14_PIG	7.84818	0.00265867
Eukaryotic translation initiation factor 3 subunit L OS=Sus scrofa OX=9823 GN=EIF3L PE=1 SV=1	tr|A0A287AL05|A0A287AL05_PIG (+2)	#DIV/0!	0.00269966
Uncharacterized protein OS=Sus scrofa OX=9823 GN=PITPNA PE=1 SV=2	tr|I3LRS8|I3LRS8_PIG	#DIV/0!	0.00269966
Uncharacterized protein OS=Sus scrofa OX=9823 PE=1 SV=1	tr|A0A287BEP3|A0A287BEP3_PIG	#DIV/0!	0.00269966
Uncharacterized protein OS=Sus scrofa OX=9823 GN=BASP1 PE=1 SV=1	tr|A0A287ALA0|A0A287ALA0_PIG	1.91991	0.00272919
Mitochondrial 2-oxoglutarate/malate carrier protein isoform 1 OS=Sus scrofa OX=9823 GN=SLC25A11 PE=1 SV=1	tr|A0A287AN76|A0A287AN76_PIG	2.81632	0.00281488
Very-long-chain (3R)-3-hydroxyacyl-CoA dehydratase OS=Sus scrofa OX=9823 GN=HACD3 PE=1 SV=3	tr|F1SJK6|F1SJK6_PIG	#DIV/0!	0.00283877
Uncharacterized protein OS=Sus scrofa OX=9823 GN=ANKS1B PE=4 SV=3	tr|F1SQT8|F1SQT8_PIG	#DIV/0!	0.00287559
Uncharacterized protein OS=Sus scrofa OX=9823 GN=NDUFB9 PE=1 SV=1	tr|K7GSE5|K7GSE5_PIG	#DIV/0!	0.00287559
Uncharacterized protein OS=Sus scrofa OX=9823 GN=FARSB PE=1 SV=2	tr|I3LUM8|I3LUM8_PIG	4.56278	0.00292815
ATP-dependent 6-phosphofructokinase OS=Sus scrofa OX=9823 GN=PFKM PE=1 SV=2	tr|I3LCA1|I3LCA1_PIG	3.24273	0.0029703
NADH dehydrogenase ubiquinone iron-sulfur protein 2, mitochondrial isoform 1 OS=Sus scrofa OX=9823 GN=NDUFS2 PE=1 SV=2	tr|F1S1A8|F1S1A8_PIG	4.10687	0.00308976
Uncharacterized protein OS=Sus scrofa OX=9823 GN=UQCRC1 PE=1 SV=1	tr|A0A287AJH5|A0A287AJH5_PIG	1.9002	0.00328002
Uncharacterized protein OS=Sus scrofa OX=9823 GN=MYO5A PE=1 SV=1	tr|A0A287BSP1|A0A287BSP1_PIG	4.18367	0.00334116
Ribosomal protein L15 OS=Sus scrofa OX=9823 GN=RPL15 PE=1 SV=1	tr|A0A286ZL65|A0A286ZL65_PIG (+1)	#DIV/0!	0.0033522
Long-chain-fatty-acid--CoA ligase 3 OS=Sus scrofa OX=9823 GN=ACSL3 PE=1 SV=1	tr|A0A287APD5|A0A287APD5_PIG (+1)	#DIV/0!	0.00339737
Neurofilament medium polypeptide (Fragment) OS=Sus scrofa OX=9823 GN=NEFM PE=1 SV=2	sp|P08552|NFM_PIG	#DIV/0!	0.00342395
Cytochrome c oxidase subunit 2 OS=Sus scrofa OX=9823 GN=MT-CO2 PE=3 SV=1	sp|P50667|COX2_PIG (+1)	1.98328	0.00351548
Dynamin-1-like protein isoform 6 OS=Sus scrofa OX=9823 GN=DNM1L PE=1 SV=3	tr|F1SGD1|F1SGD1_PIG	2.62027	0.00355452
Uncharacterized protein OS=Sus scrofa OX=9823 GN=RAB35 PE=1 SV=1	tr|A0A287BFE6|A0A287BFE6_PIG	#DIV/0!	0.00355757
Apolipoprotein B-100 OS=Sus scrofa OX=9823 GN=APOB PE=1 SV=1	tr|A0A287AG13|A0A287AG13_PIG	18.0437	0.00359728
Heterogeneous nuclear ribonucleoprotein H2 OS=Sus scrofa OX=9823 GN=HNRNPH2 PE=1 SV=1	tr|A0A286ZWW2|A0A286ZWW2_PIG	#DIV/0!	0.00365091
60S ribosomal protein L10 OS=Sus scrofa OX=9823 GN=RPL10 PE=1 SV=3	sp|Q29195|RL10_PIG	7.19549	0.0036706
Cytochrome b5 type B OS=Sus scrofa OX=9823 GN=CYB5B PE=1 SV=1	tr|A0A287BA78|A0A287BA78_PIG (+1)	2.86827	0.0036924
40S ribosomal protein S9 OS=Sus scrofa OX=9823 GN=RPS9 PE=1 SV=1	tr|A0A287A1H3|A0A287A1H3_PIG	#DIV/0!	0.00375156
Apolipoprotein A-IV OS=Sus scrofa OX=9823 GN=APOA4 PE=1 SV=1	tr|A0A287BM29|A0A287BM29_PIG (+1)	#DIV/0!	0.00385567
Uncharacterized protein OS=Sus scrofa OX=9823 GN=SLC12A5 PE=1 SV=1	tr|A0A286ZZQ4|A0A286ZZQ4_PIG (+1)	3.00012	0.00388711
Uncharacterized protein OS=Sus scrofa OX=9823 GN=CACNB4 PE=4 SV=1	tr|A0A287AHB4|A0A287AHB4_PIG (+3)	#DIV/0!	0.00388881
Uncharacterized protein OS=Sus scrofa OX=9823 GN=NCAM2 PE=1 SV=3	tr|F1SHP7|F1SHP7_PIG	4.17452	0.00395064
Uncharacterized protein OS=Sus scrofa OX=9823 GN=STOML2 PE=1 SV=1	tr|A0A286ZSD7|A0A286ZSD7_PIG	3.19183	0.0040065
Glutamate decarboxylase 1 OS=Sus scrofa OX=9823 GN=GAD1 PE=1 SV=1	tr|A0A287ACS8|A0A287ACS8_PIG	#DIV/0!	0.00403287
Uncharacterized protein OS=Sus scrofa OX=9823 GN=ENDOD1 PE=1 SV=1	tr|F1STI9|F1STI9_PIG	#DIV/0!	0.00405549
ATP synthase subunit alpha, mitochondrial OS=Sus scrofa OX=9823 GN=ATP5F1A PE=1 SV=2	sp|P80021|ATPA_PIG (+1)	1.84946	0.00408917
Tyrosine-protein phosphatase non-receptor type OS=Sus scrofa OX=9823 GN=PTPN11 PE=1 SV=1	tr|A0A287AQB6|A0A287AQB6_PIG	#DIV/0!	0.00408945
Tyrosine-protein phosphatase non-receptor type OS=Sus scrofa OX=9823 GN=PTPN11 PE=1 SV=2
Tyrosine-protein phosphatase non-receptor type OS=Sus scrofa OX=9823 GN=PTPN11 PE=1 SV=3
Tyrosine-protein phosphatase non-receptor type OS=Sus scrofa OX=9823 GN=PTPN11 PE=1 SV=4
Uncharacterized protein OS=Sus scrofa OX=9823 GN=DNM3 PE=1 SV=1	tr|A0A287B3P6|A0A287B3P6_PIG	1.95025	0.00417881
Uncharacterized protein OS=Sus scrofa OX=9823 GN=DMXL2 PE=1 SV=1	tr|A0A286ZW24|A0A286ZW24_PIG	8.18645	0.00438648
Coatomer subunit beta OS=Sus scrofa OX=9823 GN=COPB1 PE=2 SV=1	sp|D2SW95|COPB_PIG (+1)	#DIV/0!	0.00441755
Uncharacterized protein OS=Sus scrofa OX=9823 GN=IPO9 PE=1 SV=1	tr|A0A286ZP63|A0A286ZP63_PIG (+2)	#DIV/0!	0.00441755
Very long-chain specific acyl-CoA dehydrogenase, mitochondrial isoform 1 OS=Sus scrofa OX=9823 GN=ACADVL PE=1 SV=3	tr|F1ST43|F1ST43_PIG	#DIV/0!	0.00441755
NADH-ubiquinone oxidoreductase chain 5 OS=Sus scrofa OX=9823 GN=MT-ND5 PE=1 SV=1	sp|Q9TDR1|NU5M_PIG	#DIV/0!	0.00441755
Uncharacterized protein OS=Sus scrofa OX=9823 GN=UGGT1 PE=1 SV=1	tr|A0A287B9Y1|A0A287B9Y1_PIG (+1)	#DIV/0!	0.00441755
Uncharacterized protein OS=Sus scrofa OX=9823 GN=HARS PE=1 SV=1	tr|F1RGD9|F1RGD9_PIG	#DIV/0!	0.00441755
Uncharacterized protein OS=Sus scrofa OX=9823 GN=PREPL PE=1 SV=2	tr|F1S5K3|F1S5K3_PIG	#DIV/0!	0.00441755
60S ribosomal protein L27 OS=Sus scrofa OX=9823 GN=RPL27 PE=1 SV=1	sp|A1XQU5|RL27_PIG	#DIV/0!	0.00446645
40S ribosomal protein S13 OS=Sus scrofa OX=9823 GN=RPS13 PE=1 SV=3	tr|F6Q5P0|F6Q5P0_PIG	#DIV/0!	0.00446645
Calcium-binding protein 39 OS=Sus scrofa OX=9823 GN=CAB39 PE=1 SV=1	tr|F1SMX5|F1SMX5_PIG	6.80176	0.00447439
Glutamine synthetase OS=Sus scrofa OX=9823 GN=GLUL PE=2 SV=1	tr|D0G6X5|D0G6X5_PIG	2.20516	0.00449785
ATP-dependent RNA helicase A OS=Sus scrofa OX=9823 GN=DHX9 PE=1 SV=2	tr|K7GND3|K7GND3_PIG	6.67412	0.00463035
Uncharacterized protein OS=Sus scrofa OX=9823 GN=CNTNAP1 PE=1 SV=3	tr|F1S1F0|F1S1F0_PIG	3.54677	0.00464375
Actin-related protein 2 OS=Sus scrofa OX=9823 GN=ACTR2 PE=1 SV=1	tr|B5APU3|B5APU3_PIG	3.0749	0.00468915
Uncharacterized protein OS=Sus scrofa OX=9823 GN=ACADSB PE=1 SV=1	tr|A0A287B1V1|A0A287B1V1_PIG (+1)	6.93458	0.00470508
Protein SCAI OS=Sus scrofa OX=9823 GN=SCAI PE=1 SV=1	tr|A0A287B360|A0A287B360_PIG	#DIV/0!	0.00472467
Sarcoplasmic/endoplasmic reticulum calcium ATPase 2 OS=Sus scrofa OX=9823 GN=ATP2A2 PE=1 SV=1	sp|P11607|AT2A2_PIG	3.0299	0.00487103
Annexin OS=Sus scrofa OX=9823 GN=ANXA6 PE=1 SV=3	tr|F1S0V3|F1S0V3_PIG	3.22299	0.00493017
Annexin OS=Sus scrofa OX=9823 GN=ANXA6 PE=1 SV=4
Annexin OS=Sus scrofa OX=9823 GN=ANXA6 PE=1 SV=5
Annexin OS=Sus scrofa OX=9823 GN=ANXA6 PE=1 SV=6
Annexin OS=Sus scrofa OX=9823 GN=ANXA6 PE=1 SV=7
Annexin OS=Sus scrofa OX=9823 GN=ANXA6 PE=1 SV=8
60S ribosomal protein L7a OS=Sus scrofa OX=9823 GN=RPL7A PE=1 SV=1	tr|A0A286ZQA5|A0A286ZQA5_PIG (+1)	#DIV/0!	0.00493742
26S proteasome non-ATPase regulatory subunit 12 OS=Sus scrofa OX=9823 GN=PSMD12 PE=1 SV=1	tr|F1RSM2|F1RSM2_PIG	#DIV/0!	0.00508533
Calcium-transporting ATPase OS=Sus scrofa OX=9823 GN=ATP2B2 PE=1 SV=1	tr|A0A286ZSF2|A0A286ZSF2_PIG (+3)	3.01317	0.00510911
Calcium-transporting ATPase OS=Sus scrofa OX=9823 GN=ATP2B2 PE=1 SV=2
Calcium-transporting ATPase OS=Sus scrofa OX=9823 GN=ATP2B2 PE=1 SV=3
Arginine--tRNA ligase, cytoplasmic OS=Sus scrofa OX=9823 GN=RARS PE=1 SV=3	tr|F1RR89|F1RR89_PIG	9.42276	0.00518404
Cathepsin B OS=Sus scrofa OX=9823 GN=CTSB PE=1 SV=1	tr|A0A287BF94|A0A287BF94_PIG	5.3235	0.00523953
Uncharacterized protein OS=Sus scrofa OX=9823 GN=GABRG2 PE=1 SV=1	tr|A0A287AEH9|A0A287AEH9_PIG (+1)	#DIV/0!	0.00529453
Glutamate decarboxylase 2 OS=Sus scrofa OX=9823 GN=GAD2 PE=2 SV=1	sp|P48321|DCE2_PIG	#DIV/0!	0.00535466
Glutamate decarboxylase 2 OS=Sus scrofa OX=9823 GN=GAD2 PE=2 SV=2
Rho GTPase-activating protein 35 OS=Sus scrofa OX=9823 GN=ARHGAP35 PE=2 SV=3	tr|F1RM07|F1RM07_PIG	#DIV/0!	0.00535466
Neutral alpha-glucosidase AB OS=Sus scrofa OX=9823 GN=GANAB PE=1 SV=1	sp|P79403|GANAB_PIG (+1)	2.33807	0.00542174
Uncharacterized protein OS=Sus scrofa OX=9823 GN=DNAJA2 PE=3 SV=1	tr|F1RP05|F1RP05_PIG	12.5481	0.00544208
Uncharacterized protein OS=Sus scrofa OX=9823 GN=TARS PE=1 SV=3	tr|F1SP18|F1SP18_PIG	5.25297	0.00557464
60S ribosomal protein L7 OS=Sus scrofa OX=9823 GN=RPL7 PE=1 SV=1	tr|A0A287A8T0|A0A287A8T0_PIG	#DIV/0!	0.00560549
Uncharacterized protein OS=Sus scrofa OX=9823 GN=PCYOX1L PE=1 SV=2	tr|F1RL93|F1RL93_PIG	#DIV/0!	0.00566504
Cytochrome c oxidase subunit 6C OS=Sus scrofa OX=9823 GN=COX6C PE=3 SV=1	sp|A1XQT2|COX6C_PIG (+1)	#DIV/0!	0.00566504
Coronin OS=Sus scrofa OX=9823 GN=CORO2B PE=1 SV=1	tr|A0A286ZS32|A0A286ZS32_PIG (+2)	#DIV/0!	0.0058075
Coronin OS=Sus scrofa OX=9823 GN=CORO2B PE=1 SV=2
Coronin OS=Sus scrofa OX=9823 GN=CORO2B PE=1 SV=3
Coronin OS=Sus scrofa OX=9823 GN=CORO2B PE=1 SV=4
Coronin OS=Sus scrofa OX=9823 GN=CORO2B PE=1 SV=5
Uncharacterized protein OS=Sus scrofa OX=9823 GN=RAB4A PE=1 SV=1	tr|A0A287AKG6|A0A287AKG6_PIG	#DIV/0!	0.00581652
Uncharacterized protein OS=Sus scrofa OX=9823 GN=ARF3 PE=3 SV=1	tr|A0A287B5T6|A0A287B5T6_PIG	2.4503	0.0059484
Cullin-1 OS=Sus scrofa OX=9823 GN=CUL1 PE=1 SV=3	tr|F1SAD7|F1SAD7_PIG	#DIV/0!	0.00609292
Uncharacterized protein OS=Sus scrofa OX=9823 GN=RPL24 PE=1 SV=1	tr|A0A287A286|A0A287A286_PIG	#DIV/0!	0.00609292
Angiotensinogen preproprotein OS=Sus scrofa OX=9823 GN=AGT PE=1 SV=3	tr|F1RG45|F1RG45_PIG	4.82352	0.00614844
Hemopexin OS=Sus scrofa OX=9823 GN=HPX PE=1 SV=1	sp|P50828|HEMO_PIG	4.09483	0.00623101
Pyrroline-5-carboxylate reductase OS=Sus scrofa OX=9823 GN=PYCR3 PE=1 SV=1	tr|A0A287A3W3|A0A287A3W3_PIG (+1)	#DIV/0!	0.00623694
Pyrroline-5-carboxylate reductase OS=Sus scrofa OX=9823 GN=PYCR3 PE=1 SV=2
Pyrroline-5-carboxylate reductase OS=Sus scrofa OX=9823 GN=PYCR3 PE=1 SV=3
Long-chain-fatty-acid--CoA ligase 1 isoform X2 OS=Sus scrofa OX=9823 GN=ACSL1 PE=1 SV=1	tr|A0A287AIP7|A0A287AIP7_PIG (+1)	#DIV/0!	0.00623694
Uncharacterized protein OS=Sus scrofa OX=9823 GN=LGI1 PE=4 SV=2	tr|F1SC71|F1SC71_PIG	10.0782	0.00634437
Uncharacterized protein OS=Sus scrofa OX=9823 GN=CKAP5 PE=1 SV=1	tr|A0A287A4R9|A0A287A4R9_PIG	7.18199	0.00639458
Flotillin-1 OS=Sus scrofa OX=9823 GN=FLOT1 PE=3 SV=1	sp|Q767L6|FLOT1_PIG	4.17642	0.00647399
Uncharacterized protein OS=Sus scrofa OX=9823 GN=PDXP PE=1 SV=1	tr|A0A287AZ54|A0A287AZ54_PIG	8.74544	0.00651226
Uncharacterized protein OS=Sus scrofa OX=9823 GN=AFM PE=1 SV=1	tr|A0A287A363|A0A287A363_PIG (+1)	#DIV/0!	0.00663258
Syntaxin-binding protein 1 isoform b OS=Sus scrofa OX=9823 GN=STXBP1 PE=1 SV=1	tr|A0A286ZZB2|A0A286ZZB2_PIG	2.15081	0.00670633
Uncharacterized protein OS=Sus scrofa OX=9823 GN=ITIH3 PE=1 SV=1	tr|A0A287BQK2|A0A287BQK2_PIG	#DIV/0!	0.00686475
Calcium-transporting ATPase OS=Sus scrofa OX=9823 GN=ATP2B4 PE=1 SV=1	tr|A0A287APC7|A0A287APC7_PIG	4.34412	0.00701153
Sideroflexin-1 OS=Sus scrofa OX=9823 GN=SFXN1 PE=2 SV=1	sp|A5A761|SFXN1_PIG	2.18087	0.00713578
Plasma protease C1 inhibitor OS=Sus scrofa OX=9823 GN=SERPING1 PE=1 SV=1	tr|F1SJW8|F1SJW8_PIG	#DIV/0!	0.00737395
Uncharacterized protein OS=Sus scrofa OX=9823 GN=TRAPPC11 PE=1 SV=1	tr|A0A287AUR8|A0A287AUR8_PIG (+1)	#DIV/0!	0.00743072
Estradiol 17-beta-dehydrogenase 11 OS=Sus scrofa OX=9823 GN=HSD17B13 PE=1 SV=2	tr|I3L5K3|I3L5K3_PIG	#DIV/0!	0.00743072
Uncharacterized protein OS=Sus scrofa OX=9823 GN=HSD17B6 PE=1 SV=1	tr|I3LHQ6|I3LHQ6_PIG	#DIV/0!	0.00743072
Dehydrogenase/reductase SDR family member 11 OS=Sus scrofa OX=9823 GN=DHRS11 PE=1 SV=3	tr|F1S1B9|F1S1B9_PIG	#DIV/0!	0.00743072
Phosphoribosyl pyrophosphate synthase-associated protein 2 isoform 1 OS=Sus scrofa OX=9823 GN=SLC5A10 PE=1 SV=1	tr|A0A287ABB5|A0A287ABB5_PIG (+1)	#DIV/0!	0.00752744
Uncharacterized protein OS=Sus scrofa OX=9823 GN=ARHGAP44 PE=4 SV=1	tr|A0A287A1R6|A0A287A1R6_PIG (+1)	#DIV/0!	0.00752744
Uncharacterized protein OS=Sus scrofa OX=9823 GN=CRAT PE=1 SV=1	tr|A0A287A2X3|A0A287A2X3_PIG	#DIV/0!	0.00753506
Histidine-rich glycoprotein OS=Sus scrofa OX=9823 GN=HRG PE=1 SV=2	tr|F1SFI5|F1SFI5_PIG	3.49304	0.0075511
ATP synthase subunit gamma OS=Sus scrofa OX=9823 GN=ATP5F1C PE=3 SV=1	tr|A0A287A9I8|A0A287A9I8_PIG	2.59116	0.00765979
Dual specificity mitogen-activated protein kinase kinase 4 isoform 1 OS=Sus scrofa OX=9823 GN=MAP2K4 PE=1 SV=3	tr|F1SS51|F1SS51_PIG	5.98375	0.00775843
UDP-N-acetylglucosamine--peptide N-acetylglucosaminyltransferase 110 kDa subunit OS=Sus scrofa OX=9823 GN=OGT PE=4 SV=2	tr|K7GKQ6|K7GKQ6_PIG	8.31512	0.00779156
Ras-related protein Rab-14 OS=Sus scrofa OX=9823 GN=RAB14 PE=4 SV=1	tr|A0A287AN37|A0A287AN37_PIG	2.73253	0.00783978
Neurexin 1 OS=Sus scrofa OX=9823 GN=NRXN1 PE=1 SV=1	tr|A0A286ZQ53|A0A286ZQ53_PIG (+1)	#DIV/0!	0.00785337
Uncharacterized protein OS=Sus scrofa OX=9823 PE=4 SV=1	tr|A0A286ZI90|A0A286ZI90_PIG (+1)	3.03026	0.00792037
Alpha-1,4 glucan phosphorylase OS=Sus scrofa OX=9823 GN=PYGM PE=1 SV=2	tr|F1RQQ8|F1RQQ8_PIG	2.72568	0.008028
Voltage-dependent anion-selective channel protein 3 OS=Sus scrofa OX=9823 GN=VDAC3 PE=1 SV=3	tr|F1SE26|F1SE26_PIG (+1)	6.01361	0.00805055
Malic enzyme OS=Sus scrofa OX=9823 GN=ME3 PE=1 SV=3	tr|F1STS4|F1STS4_PIG	3.02398	0.00805612
Uncharacterized protein OS=Sus scrofa OX=9823 GN=PHB2 PE=1 SV=1	tr|A0A287A7F6|A0A287A7F6_PIG (+1)	3.13301	0.00808781
Trifunctional enzyme subunit alpha, mitochondrial OS=Sus scrofa OX=9823 GN=HADHA PE=1 SV=1	sp|Q29554|ECHA_PIG	3.59737	0.00819104
Exportin-2 OS=Sus scrofa OX=9823 GN=CSE1L PE=1 SV=2	tr|I3LPP4|I3LPP4_PIG	#DIV/0!	0.00833855
Protein ERGIC-53 OS=Sus scrofa OX=9823 GN=LMAN1 PE=1 SV=2	tr|F1SMS8|F1SMS8_PIG	#DIV/0!	0.00833855
Mitogen-activated protein kinase OS=Sus scrofa OX=9823 GN=MAPK10 PE=4 SV=2	tr|K7GP94|K7GP94_PIG (+1)	#DIV/0!	0.00841841
Calcium-transporting ATPase OS=Sus scrofa OX=9823 GN=ATP2B3 PE=1 SV=1	tr|A0A287BKH5|A0A287BKH5_PIG	6.31495	0.00855379
ATP synthase subunit beta OS=Sus scrofa OX=9823 GN=ATP5F1B PE=1 SV=2	tr|K7GLT8|K7GLT8_PIG	1.8935	0.0085973
PDZ and LIM domain protein 1 OS=Sus scrofa OX=9823 GN=PDLIM1 PE=1 SV=3	tr|F1SC51|F1SC51_PIG	0	0.00861887
Uncharacterized protein OS=Sus scrofa OX=9823 GN=DLGAP1 PE=4 SV=1	tr|A0A287A593|A0A287A593_PIG	#DIV/0!	0.00878356
Uncharacterized protein OS=Sus scrofa OX=9823 GN=C8B PE=1 SV=1	tr|A0A287AT36|A0A287AT36_PIG (+1)	#DIV/0!	0.00892244
Complement C5a anaphylatoxin OS=Sus scrofa OX=9823 GN=C5 PE=1 SV=1	tr|A0A287AIM8|A0A287AIM8_PIG (+1)	#DIV/0!	0.00892244
Uncharacterized protein OS=Sus scrofa OX=9823 GN=PLEC PE=1 SV=1	tr|A0A287B2H9|A0A287B2H9_PIG	3.27833	0.00906638
GBAK OS=Sus scrofa OX=9823 GN=GNAI3 PE=1 SV=1	tr|Q06AS8|Q06AS8_PIG	3.46902	0.00911164
Ras-related protein Rab-2B isoform 1 OS=Sus scrofa OX=9823 GN=RAB2B PE=1 SV=1	tr|F1S8J6|F1S8J6_PIG	5.8914	0.00911882
Uncharacterized protein OS=Sus scrofa OX=9823 GN=CAND1 PE=1 SV=2	tr|F2Z5R6|F2Z5R6_PIG	2.87784	0.00914373
Serine/threonine-protein kinase DCLK1 isoform 5 OS=Sus scrofa OX=9823 GN=DCLK1 PE=1 SV=1	tr|A0A286ZWQ7|A0A286ZWQ7_PIG	2.27163	0.00940976
Alpha-1,4 glucan phosphorylase OS=Sus scrofa OX=9823 GN=PYGB PE=1 SV=1	tr|A0A287AL55|A0A287AL55_PIG	2.60461	0.00945263
Complement component C7 OS=Sus scrofa OX=9823 GN=C7 PE=1 SV=1	sp|Q9TUQ3|CO7_PIG (+1)	#DIV/0!	0.00957234
Importin-7 OS=Sus scrofa OX=9823 GN=IPO7 PE=1 SV=1	tr|A0A287A5B3|A0A287A5B3_PIG	5.72608	0.00958481
Serum albumin OS=Sus scrofa OX=9823 GN=ALB PE=1 SV=1	tr|A0A286ZT13|A0A286ZT13_PIG (+2)	2.74836	0.00959088
Uncharacterized protein OS=Sus scrofa OX=9823 GN=GNB4 PE=1 SV=1	tr|A0A287A365|A0A287A365_PIG	1.97209	0.00962216
Uncharacterized protein OS=Sus scrofa OX=9823 GN=VARS PE=1 SV=1	tr|A0A287BPW4|A0A287BPW4_PIG	10.5265	0.00964559
Profilin OS=Sus scrofa OX=9823 GN=PFN2 PE=1 SV=2
Profilin OS=Sus scrofa OX=9823 GN=PFN2 PE=1 SV=2	tr|I3L660|I3L660_PIG	1.61536	0.00982163
26S proteasome non-ATPase regulatory subunit 3 OS=Sus scrofa OX=9823 GN=PSMD3 PE=1 SV=3	tr|F1RXA7|F1RXA7_PIG (+1)	6.69433	0.00989721
Ras-related protein Rab-1A OS=Sus scrofa OX=9823 GN=RAB1A PE=1 SV=2	tr|F2Z5U4|F2Z5U4_PIG	2.56747	0.00995901
Uncharacterized protein OS=Sus scrofa OX=9823 GN=KCNJ10 PE=1 SV=1	tr|A0A287B806|A0A287B806_PIG	#DIV/0!	0.0101352
Uncharacterized protein OS=Sus scrofa OX=9823 GN=ISOC2 PE=1 SV=3	tr|F1RMR5|F1RMR5_PIG	#DIV/0!	0.0101352
Vacuolar protein sorting-associated protein 53 homolog isoform 1 OS=Sus scrofa OX=9823 GN=VPS53 PE=1 SV=1	tr|A0A287B300|A0A287B300_PIG	#DIV/0!	0.0101409
Isochorismatase domain-containing protein 1 OS=Sus scrofa OX=9823 GN=ISOC1 PE=1 SV=1	tr|F1RKJ9|F1RKJ9_PIG	#DIV/0!	0.0101409
Lysosomal acid glucosylceramidase OS=Sus scrofa OX=9823 GN=GBA PE=3 SV=1	sp|Q70KH2|GLCM_PIG (+1)	#DIV/0!	0.0102507
Uncharacterized protein OS=Sus scrofa OX=9823 GN=DDX6 PE=1 SV=1	tr|A0A287A5V9|A0A287A5V9_PIG (+1)	#DIV/0!	0.0102507
60S ribosomal protein L5 OS=Sus scrofa OX=9823 GN=RPL5 PE=1 SV=1	tr|A0A287ASD0|A0A287ASD0_PIG	#DIV/0!	0.0102507
Uncharacterized protein OS=Sus scrofa OX=9823 GN=GUCY1B1 PE=1 SV=1	tr|A0A287AUB7|A0A287AUB7_PIG (+1)	#DIV/0!	0.0102507
Synaptotagmin-7 isoform X2 OS=Sus scrofa OX=9823 GN=SYT7 PE=1 SV=1	tr|A0A287AWQ2|A0A287AWQ2_PIG	#DIV/0!	0.0102507
Delta-1-pyrroline-5-carboxylate synthase OS=Sus scrofa OX=9823 GN=ALDH18A1 PE=1 SV=1	tr|F1SC47|F1SC47_PIG	#DIV/0!	0.0102507
Uncharacterized protein OS=Sus scrofa OX=9823 GN=STUM PE=1 SV=2	tr|I3LAT3|I3LAT3_PIG	#DIV/0!	0.0102507
Geranylgeranyl transferase type-2 subunit alpha OS=Sus scrofa OX=9823 GN=RABGGTA PE=2 SV=1	sp|A5A779|PGTA_PIG	#DIV/0!	0.0102507
Uncharacterized protein OS=Sus scrofa OX=9823 GN=GSK3A PE=1 SV=1	tr|A0A286ZZN4|A0A286ZZN4_PIG (+1)	#DIV/0!	0.0102507
Uncharacterized protein OS=Sus scrofa OX=9823 GN=RHEB PE=1 SV=1	tr|A0A287A6X6|A0A287A6X6_PIG (+2)	#DIV/0!	0.0102507
Uncharacterized protein OS=Sus scrofa OX=9823 GN=DOCK3 PE=3 SV=1	tr|A0A287AKJ4|A0A287AKJ4_PIG (+3)	#DIV/0!	0.0102507
MAL2 proteolipid protein OS=Sus scrofa OX=9823 GN=MAL2 PE=1 SV=1	tr|C3UP60|C3UP60_PIG	6.23173	0.0102996
Phosphatidylinositide phosphatase SAC1 isoform 1 OS=Sus scrofa OX=9823 GN=SACM1L PE=1 SV=2	tr|I3LJB6|I3LJB6_PIG	#DIV/0!	0.0104423
Vesicle-fusing ATPase OS=Sus scrofa OX=9823 GN=NSF PE=1 SV=3	tr|F1RRS3|F1RRS3_PIG	2.13361	0.0104554
Uncharacterized protein OS=Sus scrofa OX=9823 GN=SLC25A4 PE=1 SV=1	tr|A0A286ZIE8|A0A286ZIE8_PIG	2.6625	0.0104866
Voltage-dependent anion-selective channel protein 2 OS=Sus scrofa OX=9823 GN=VDAC2 PE=4 SV=3	tr|F1S2F6|F1S2F6_PIG	2.16488	0.0106938
ATP-binding cassette sub-family B member 8, mitochondrial isoform X1 OS=Sus scrofa OX=9823 GN=ABCB8 PE=1 SV=2	tr|I3LMV8|I3LMV8_PIG	#DIV/0!	0.0107117
Uncharacterized protein OS=Sus scrofa OX=9823 GN=LOC100153899 PE=1 SV=1	tr|A0A287AVA9|A0A287AVA9_PIG (+1)	#DIV/0!	0.0107264
Prohibitin isoform 1 OS=Sus scrofa OX=9823 GN=PHB PE=1 SV=3	tr|F2Z543|F2Z543_PIG	2.49225	0.0108091
Calcium-transporting ATPase OS=Sus scrofa OX=9823 GN=ATP2B1 PE=1 SV=3	tr|F1SPZ4|F1SPZ4_PIG	3.63053	0.0108195
C4b-binding protein alpha chain isoform X1 OS=Sus scrofa OX=9823 GN=C4BPA PE=1 SV=1	tr|A0A286ZU55|A0A286ZU55_PIG (+1)	7.36433	0.0109182
Uncharacterized protein OS=Sus scrofa OX=9823 GN=LOC100153899 PE=1 SV=1	tr|F1SCD0|F1SCD0_PIG	2.255	0.0109525
MICOS complex subunit OS=Sus scrofa OX=9823 GN=APOO PE=1 SV=1	tr|K7GPW3|K7GPW3_PIG	3.94413	0.0111619
Acyl-CoA synthetase family member 3, mitochondrial isoform 1 OS=Sus scrofa OX=9823 GN=ACSF3 PE=1 SV=1	tr|A0A286ZYB0|A0A286ZYB0_PIG (+1)	#DIV/0!	0.0112754
Mitochondrial carrier homolog 2 isoform 1 OS=Sus scrofa OX=9823 GN=MTCH2 PE=1 SV=1	tr|A0A286ZU97|A0A286ZU97_PIG	4.31046	0.0113383
Uncharacterized protein OS=Sus scrofa OX=9823 GN=A2M PE=1 SV=2	tr|K7GQ48|K7GQ48_PIG	3.19286	0.0114242
Uncharacterized protein OS=Sus scrofa OX=9823 GN=SEPT9 PE=1 SV=3	tr|F1RZ71|F1RZ71_PIG	3.44826	0.0114566
Peptidylprolyl isomerase OS=Sus scrofa OX=9823 GN=FKBP4 PE=1 SV=2	tr|F1SK86|F1SK86_PIG	#DIV/0!	0.0116205
Ganglioside-induced differentiation-associated protein 1 OS=Sus scrofa OX=9823 GN=GDAP1 PE=1 SV=1	tr|F1RWK1|F1RWK1_PIG	6.25111	0.0116386
Uncharacterized protein OS=Sus scrofa OX=9823 GN=STX1B PE=1 SV=2	tr|I3LIF3|I3LIF3_PIG	2.14272	0.0117271
ADP/ATP translocase 3 OS=Sus scrofa OX=9823 GN=SLC25A6 PE=3 SV=1	tr|A0A287AXS7|A0A287AXS7_PIG	2.73673	0.0120741
Gamma-synuclein OS=Sus scrofa OX=9823 GN=SNCG PE=1 SV=1	tr|A7YX24|A7YX24_PIG	0.302761	0.0121105
NADH dehydrogenase ubiquinone 1 alpha subcomplex subunit 11 OS=Sus scrofa OX=9823 GN=NDUFA11 PE=1 SV=1	tr|I3LGM4|I3LGM4_PIG	5.7221	0.012156
Interleukin enhancer-binding factor 2 OS=Sus scrofa OX=9823 GN=ILF2 PE=1 SV=1	tr|K7GS49|K7GS49_PIG	3.42563	0.0122498
Calcium-binding mitochondrial carrier protein SCaMC-2 isoform c OS=Sus scrofa OX=9823 GN=SLC25A25 PE=1 SV=1	tr|A0A286ZK04|A0A286ZK04_PIG (+1)	7.51631	0.0122754
Adenosylhomocysteinase OS=Sus scrofa OX=9823 GN=AHCYL1 PE=1 SV=1	tr|E7EI18|E7EI18_PIG	4.23361	0.0124295
Uncharacterized protein OS=Sus scrofa OX=9823 GN=NPTN PE=1 SV=1	tr|A0A287BAZ0|A0A287BAZ0_PIG	2.06029	0.012443
Uncharacterized protein OS=Sus scrofa OX=9823 GN=GABRB3 PE=1 SV=3	tr|F1RR58|F1RR58_PIG	#DIV/0!	0.0125095
NAD(P) transhydrogenase, mitochondrial isoform X1 OS=Sus scrofa OX=9823 GN=NNT PE=1 SV=2	tr|F1SMG3|F1SMG3_PIG	2.9897	0.0125215
V-type proton ATPase subunit C OS=Sus scrofa OX=9823 GN=ATP6V1C1 PE=1 SV=1	tr|A0A287AXI2|A0A287AXI2_PIG (+1)	3.99832	0.012569
Uncharacterized protein OS=Sus scrofa OX=9823 GN=MGLL PE=1 SV=1	tr|A0A286ZUB0|A0A286ZUB0_PIG (+1)	5.89447	0.0126653
Uncharacterized protein OS=Sus scrofa OX=9823 GN=SCN2B PE=4 SV=1	tr|A0A286ZLV7|A0A286ZLV7_PIG (+2)	8.92265	0.0128758
Uncharacterized protein OS=Sus scrofa OX=9823 GN=STXBP5 PE=1 SV=1	tr|A0A287A335|A0A287A335_PIG (+2)	#DIV/0!	0.0128983
Actin-related protein 2/3 complex subunit OS=Sus scrofa OX=9823 GN=ARPC1A PE=1 SV=1	tr|F1REX9|F1REX9_PIG	2.36452	0.0129456
Elongation factor Tu OS=Sus scrofa OX=9823 GN=TUFM PE=1 SV=1	tr|F1RFI1|F1RFI1_PIG	1.94137	0.013049
Exportin-7 OS=Sus scrofa OX=9823 GN=XPO7 PE=1 SV=3	tr|F1RMC3|F1RMC3_PIG (+1)	#DIV/0!	0.0130844
Phosphatidate cytidylyltransferase OS=Sus scrofa OX=9823 GN=CDS2 PE=1 SV=1	tr|A0A287BFG8|A0A287BFG8_PIG (+1)	#DIV/0!	0.013179
Serum paraoxonase/arylesterase 2 isoform 1 OS=Sus scrofa OX=9823 GN=PON2 PE=1 SV=2	tr|F1SFA2|F1SFA2_PIG	#DIV/0!	0.013179
Guanine nucleotide-binding protein G(I) subunit alpha-1 isoform 1 OS=Sus scrofa OX=9823 GN=GNAI1 PE=1 SV=3	tr|F1SB90|F1SB90_PIG	3.23976	0.01326
Uncharacterized protein OS=Sus scrofa OX=9823 GN=SLC8A2 PE=1 SV=1	tr|A0A286ZK85|A0A286ZK85_PIG (+1)	5.30825	0.013272
Uncharacterized protein OS=Sus scrofa OX=9823 GN=FMNL2 PE=4 SV=3	tr|F1RQH3|F1RQH3_PIG	#DIV/0!	0.0134587
Uncharacterized protein OS=Sus scrofa OX=9823 GN=NRXN3 PE=1 SV=1	tr|A0A287AG03|A0A287AG03_PIG	#DIV/0!	0.0137431
Uncharacterized protein OS=Sus scrofa OX=9823 GN=PCCA PE=1 SV=1	tr|A0A287A1V2|A0A287A1V2_PIG (+3)	#DIV/0!	0.0137431
Pyruvate kinase OS=Sus scrofa OX=9823 GN=PKM PE=1 SV=1	tr|A0A287ACX9|A0A287ACX9_PIG	1.62104	0.0139006
Tripartite motif-containing protein 2 isoform X5 OS=Sus scrofa OX=9823 GN=TRIM2 PE=1 SV=2	tr|I3L8U3|I3L8U3_PIG	2.37791	0.0139345
Epidermal fatty acid-binding protein OS=Sus scrofa OX=9823 GN=FABP5 PE=1 SV=1	tr|Q2EN74|Q2EN74_PIG	#DIV/0!	0.0140326
Dolichyl-diphosphooligosaccharide--protein glycosyltransferase subunit 1 OS=Sus scrofa OX=9823 GN=RPN1 PE=1 SV=1	sp|Q9GMB0|RPN1_PIG (+1)	2.17146	0.0142297
Inter-alpha-trypsin inhibitor heavy chain H2 OS=Sus scrofa OX=9823 GN=ITIH2 PE=2 SV=1	sp|O02668|ITIH2_PIG (+1)	5.17179	0.0143163
RAB5B, member RAS oncogene family OS=Sus scrofa OX=9823 GN=RAB5B PE=1 SV=1	tr|A0A287BNU5|A0A287BNU5_PIG	6.40147	0.0143974
Receptor of activated protein C kinase 1 OS=Sus scrofa OX=9823 GN=RACK1 PE=1 SV=3	sp|P63246|RACK1_PIG	6.82892	0.0144746
Casein kinase II subunit alpha isoform X1 OS=Sus scrofa OX=9823 GN=CSNK2A1 PE=1 SV=1	tr|F2Z5I5|F2Z5I5_PIG	5.48481	0.0145438
Transporter OS=Sus scrofa OX=9823 GN=SLC6A1 PE=1 SV=1	tr|F1SQA4|F1SQA4_PIG	3.39181	0.014604
Guanine nucleotide-binding protein subunit gamma OS=Sus scrofa OX=9823 GN=GNG2 PE=1 SV=2	tr|I3LJ42|I3LJ42_PIG	0.410922	0.0147161
Calcium/calmodulin-dependent protein kinase type II subunit alpha isoform 2 OS=Sus scrofa OX=9823 GN=CAMK2A PE=1 SV=2	tr|I3LNG5|I3LNG5_PIG	2.047	0.0147963
Uncharacterized protein OS=Sus scrofa OX=9823 GN=SERPINA3-2 PE=1 SV=3	tr|F1SCD1|F1SCD1_PIG	3.12719	0.0148432
60S ribosomal protein L13 OS=Sus scrofa OX=9823 GN=RPL13 PE=1 SV=1	tr|I3LSD3|I3LSD3_PIG	5.67256	0.0150248
Uncharacterized protein OS=Sus scrofa OX=9823 GN=OPA1 PE=1 SV=1	tr|A0A287AAF5|A0A287AAF5_PIG (+1)	3.77783	0.0151389
Asparagine--tRNA ligase, cytoplasmic OS=Sus scrofa OX=9823 GN=NARS PE=1 SV=3	tr|F1S1X3|F1S1X3_PIG	6.77678	0.015253
Electron transfer flavoprotein subunit beta OS=Sus scrofa OX=9823 GN=ETFB PE=1 SV=3	sp|Q6UAQ8|ETFB_PIG	2.1075	0.0152801
ADP/ATP translocase 2 OS=Sus scrofa OX=9823 GN=SLC25A5 PE=1 SV=1	tr|F2Z565|F2Z565_PIG	2.39662	0.0153066
Disks large homolog 4 isoform 4 OS=Sus scrofa OX=9823 GN=DLG4 PE=1 SV=1	tr|A0A287B083|A0A287B083_PIG	4.86424	0.0153194
14 kDa phosphohistidine phosphatase OS=Sus scrofa OX=9823 GN=PHPT1 PE=1 SV=2	sp|P59083|PHP14_PIG	0.449834	0.0153562
Uncharacterized protein OS=Sus scrofa OX=9823 GN=NT5DC3 PE=1 SV=3	tr|F1SRK2|F1SRK2_PIG (+1)	6.4951	0.0153805
Elongation factor 1-alpha OS=Sus scrofa OX=9823 GN=EEF1A1 PE=1 SV=1	tr|A0A288CG57|A0A288CG57_PIG (+1)	1.18025	0.015415
Armadillo repeat-containing protein 10 isoform b OS=Sus scrofa OX=9823 GN=ARMC10 PE=1 SV=1	tr|I3LLX9|I3LLX9_PIG	7.1586	0.015524
Uncharacterized protein OS=Sus scrofa OX=9823 GN=MYH14 PE=1 SV=2	tr|I3LIE3|I3LIE3_PIG (+1)	8.73667	0.0155583
Uncharacterized protein OS=Sus scrofa OX=9823 GN=ACSBG1 PE=1 SV=3	tr|F1RKU1|F1RKU1_PIG	#DIV/0!	0.0156337
40S ribosomal protein S7 OS=Sus scrofa OX=9823 GN=RPS7 PE=1 SV=1	tr|A0A287A9Y6|A0A287A9Y6_PIG (+1)	3.14309	0.0157943
DnaJ homolog subfamily A member 1 isoform 1 OS=Sus scrofa OX=9823 GN=DNAJA1 PE=1 SV=1	tr|F1SE73|F1SE73_PIG	3.71651	0.0158439
Aspartate--tRNA ligase, cytoplasmic isoform 1 OS=Sus scrofa OX=9823 GN=DARS PE=1 SV=1	tr|F1S0D9|F1S0D9_PIG	4.2892	0.0159165
Solute carrier family 2, facilitated glucose transporter member 1 OS=Sus scrofa OX=9823 GN=SLC2A1 PE=2 SV=2	sp|P20303|GTR1_PIG (+2)	5.05267	0.0162397
Glycogen debranching enzyme isoform 1 OS=Sus scrofa OX=9823 GN=AGL PE=1 SV=1	tr|A0A287AXA8|A0A287AXA8_PIG (+1)	11.8792	0.0163371
Complement C3 OS=Sus scrofa OX=9823 GN=C3 PE=1 SV=3	tr|F1SBS4|F1SBS4_PIG	3.64901	0.0164586
Phytanoyl-CoA hydroxylase-interacting protein OS=Sus scrofa OX=9823 GN=PHYHIP PE=1 SV=3	tr|F1RMB1|F1RMB1_PIG	2.71167	0.0167679
26S proteasome non-ATPase regulatory subunit 8 OS=Sus scrofa OX=9823 GN=PSMD8 PE=1 SV=1	tr|A0A287B5Q7|A0A287B5Q7_PIG	5.68107	0.0169197
Uncharacterized protein OS=Sus scrofa OX=9823 GN=ACLY PE=1 SV=1	tr|A0A287B3W8|A0A287B3W8_PIG (+1)	3.29414	0.0169524
ATP-dependent 6-phosphofructokinase OS=Sus scrofa OX=9823 GN=PFKP PE=1 SV=2	tr|I3LK68|I3LK68_PIG	3.79687	0.0173523
Uncharacterized protein OS=Sus scrofa OX=9823 GN=LRG1 PE=1 SV=2	tr|F1S7K2|F1S7K2_PIG	#DIV/0!	0.017535
Cell adhesion molecule 4 OS=Sus scrofa OX=9823 GN=CADM4 PE=1 SV=3	tr|F1RMV8|F1RMV8_PIG	0.578124	0.0178291
Uncharacterized protein OS=Sus scrofa OX=9823 GN=DPP6 PE=1 SV=1	tr|A0A287AZT3|A0A287AZT3_PIG (+1)	2.89342	0.0179458
GTP-binding protein SAR1a OS=Sus scrofa OX=9823 GN=SAR1A PE=2 SV=1	sp|Q52NJ3|SAR1A_PIG	#DIV/0!	0.018044
Uncharacterized protein OS=Sus scrofa OX=9823 GN=VPS26A PE=1 SV=1	tr|A0A287B900|A0A287B900_PIG (+1)	#DIV/0!	0.018044
V-type proton ATPase catalytic subunit A OS=Sus scrofa OX=9823 GN=ATP6V1A PE=1 SV=1	tr|F1SP93|F1SP93_PIG	2.09623	0.018483
Complement factor B OS=Sus scrofa OX=9823 GN=CFB PE=1 SV=1	tr|F1RQW6|F1RQW6_PIG	3.48317	0.0188431
Coatomer subunit alpha OS=Sus scrofa OX=9823 GN=COPA PE=1 SV=1	tr|F1RJX8|F1RJX8_PIG	#DIV/0!	0.0188594
Guanine nucleotide-binding protein subunit alpha-11 OS=Sus scrofa OX=9823 GN=GNA11 PE=2 SV=2	sp|Q2XSV9|GNA11_PIG	5.48007	0.018893
GNAS complex locus OS=Sus scrofa OX=9823 GN=GNAS PE=1 SV=1	tr|A5GFU0|A5GFU0_PIG	3.45853	0.0189496
V-type proton ATPase subunit B, brain isoform OS=Sus scrofa OX=9823 GN=ATP6V1B2 PE=1 SV=1	tr|F1RMZ8|F1RMZ8_PIG	1.97775	0.0191899
Uncharacterized protein OS=Sus scrofa OX=9823 GN=MADD PE=1 SV=1	tr|A0A286ZQM2|A0A286ZQM2_PIG (+3)	8.14033	0.019419
Malic enzyme OS=Sus scrofa OX=9823 GN=ME1 PE=1 SV=3	tr|F1RQM4|F1RQM4_PIG	3.36453	0.0194461
Uncharacterized protein OS=Sus scrofa OX=9823 GN=PPM1B PE=1 SV=3	tr|F1S5K0|F1S5K0_PIG	#DIV/0!	0.0200766
1,4-alpha-glucan-branching enzyme OS=Sus scrofa OX=9823 GN=GBE1 PE=1 SV=1	tr|A0A287AII8|A0A287AII8_PIG	#DIV/0!	0.0202294
Protein transport protein SEC23 OS=Sus scrofa OX=9823 GN=SEC23A PE=1 SV=1	tr|F1SHL3|F1SHL3_PIG	#DIV/0!	0.0202294
Ras-related protein Rab-21 OS=Sus scrofa OX=9823 GN=RAB21 PE=1 SV=1	tr|A0A287A4W6|A0A287A4W6_PIG	4.15074	0.0202473
Isocitrate dehydrogenase [NAD] subunit, mitochondrial OS=Sus scrofa OX=9823 GN=IDH3G PE=1 SV=3	tr|F1S297|F1S297_PIG	2.47444	0.0202857
Glycerol-3-phosphate dehydrogenase OS=Sus scrofa OX=9823 GN=GPD2 PE=1 SV=1	tr|A0A287AIB2|A0A287AIB2_PIG (+1)	2.64971	0.0203351
Succinate-semialdehyde dehydrogenase OS=Sus scrofa OX=9823 GN=ALDH5A1 PE=1 SV=1	tr|A0A287AR05|A0A287AR05_PIG	3.34738	0.0205538
Uncharacterized protein OS=Sus scrofa OX=9823 GN=DDX1 PE=1 SV=3	tr|F1SCS1|F1SCS1_PIG	1.95566	0.0206786
Uncharacterized protein OS=Sus scrofa OX=9823 GN=PGM1 PE=1 SV=3	tr|F1S814|F1S814_PIG	2.73396	0.0207097
AP-2 complex subunit alpha OS=Sus scrofa OX=9823 GN=AP2A2 PE=1 SV=3	tr|F1RZ02|F1RZ02_PIG	3.09263	0.0210159
Malignant T-cell-amplified sequence OS=Sus scrofa OX=9823 GN=LOC100738684 PE=1 SV=1	tr|A0A286ZJU5|A0A286ZJU5_PIG	#DIV/0!	0.0211831
Uncharacterized protein OS=Sus scrofa OX=9823 GN=GC PE=1 SV=2	tr|I3LN42|I3LN42_PIG	2.68211	0.0216401
NADH-ubiquinone oxidoreductase chain 4 OS=Sus scrofa OX=9823 GN=MT-ND4 PE=1 SV=2	sp|O79881|NU4M_PIG	#DIV/0!	0.0218189
Uncharacterized protein OS=Sus scrofa OX=9823 GN=UQCRQ PE=1 SV=1	tr|F1RI18|F1RI18_PIG	6.8816	0.0219556
Sacsin isoform X1 OS=Sus scrofa OX=9823 GN=SACS PE=4 SV=1	tr|A0A286ZMI9|A0A286ZMI9_PIG (+3)	#DIV/0!	0.0221742
Uncharacterized protein OS=Sus scrofa OX=9823 GN=SLC24A2 PE=3 SV=1	tr|A0A287AZT4|A0A287AZT4_PIG	#DIV/0!	0.0221742
Coatomer subunit beta' OS=Sus scrofa OX=9823 GN=COPB2 PE=1 SV=1	tr|A0A286ZPT0|A0A286ZPT0_PIG (+1)	4.89041	0.0222386
Uncharacterized protein OS=Sus scrofa OX=9823 GN=UBR4 PE=1 SV=3	tr|F1SUQ5|F1SUQ5_PIG	4.94123	0.0222562
Uncharacterized protein OS=Sus scrofa OX=9823 GN=ERLIN2 PE=1 SV=1	tr|A0A287BRP6|A0A287BRP6_PIG (+1)	#DIV/0!	0.0224211
Gamma-aminobutyric acid receptor subunit beta-2 isoform 2 OS=Sus scrofa OX=9823 GN=GABRB2 PE=1 SV=1	tr|A0A287BG52|A0A287BG52_PIG	#DIV/0!	0.0224899
Ras-related protein Rab-1B OS=Sus scrofa OX=9823 GN=RAB1B PE=4 SV=1	tr|A0A286ZJ53|A0A286ZJ53_PIG	4.71635	0.0227036
MICOS complex subunit MIC60 OS=Sus scrofa OX=9823 GN=IMMT PE=1 SV=1	tr|A0A287AMM6|A0A287AMM6_PIG	2.94034	0.0228224
Ras-related protein Rap-2a OS=Sus scrofa OX=9823 GN=RAP2A PE=1 SV=1	tr|A0A286ZUT3|A0A286ZUT3_PIG	2.87653	0.0229925
Fetuin-B isoform 1 OS=Sus scrofa OX=9823 GN=FETUB PE=1 SV=3	tr|F1SFI6|F1SFI6_PIG	5.73652	0.0230127
Neutral cholesterol ester hydrolase 1 isoform b OS=Sus scrofa OX=9823 GN=NCEH1 PE=1 SV=1	tr|A0A287A310|A0A287A310_PIG	4.57187	0.0234542
Dynactin subunit 1 isoform 6 OS=Sus scrofa OX=9823 GN=DCTN1 PE=1 SV=1	tr|A0A286ZRC7|A0A286ZRC7_PIG (+2)	1.51842	0.023892
Uncharacterized protein OS=Sus scrofa OX=9823 GN=ALDH4A1 PE=1 SV=2	tr|I3LNB4|I3LNB4_PIG	3.77459	0.0240098
SH3 domain-binding glutamic acid-rich-like protein OS=Sus scrofa OX=9823 GN=SH3BGRL3 PE=1 SV=1	tr|A0A286ZWS0|A0A286ZWS0_PIG	0.343422	0.0240691
Uncharacterized protein OS=Sus scrofa OX=9823 GN=PPA1 PE=1 SV=2	tr|F1SUE3|F1SUE3_PIG	1.29171	0.0242713
Uncharacterized protein OS=Sus scrofa OX=9823 GN=ATP5MD PE=1 SV=1	tr|F1RFD4|F1RFD4_PIG	6.57716	0.0242919
Fatty-acid amide hydrolase 1 OS=Sus scrofa OX=9823 GN=FAAH PE=1 SV=1	sp|Q9TUI8|FAAH1_PIG (+2)	4.55772	0.0243119
V-type proton ATPase subunit a OS=Sus scrofa OX=9823 GN=ATP6V0A1 PE=1 SV=1	tr|A0A287BB51|A0A287BB51_PIG (+1)	3.188	0.024445
Uncharacterized protein OS=Sus scrofa OX=9823 GN=CAMKV PE=1 SV=2	tr|I3LSE4|I3LSE4_PIG	2.86549	0.0244833
Uncharacterized protein OS=Sus scrofa OX=9823 GN=SEPT7 PE=1 SV=1	tr|A0A287BDJ1|A0A287BDJ1_PIG	2.05385	0.0247099
Uncharacterized protein OS=Sus scrofa OX=9823 GN=LANCL1 PE=1 SV=1	tr|A0A286ZXU8|A0A286ZXU8_PIG (+1)	3.1414	0.0247874
40S ribosomal protein S18 OS=Sus scrofa OX=9823 GN=RPS18 PE=1 SV=3	sp|P62272|RS18_PIG	3.31989	0.0249837
Sodium/potassium-transporting ATPase subunit alpha OS=Sus scrofa OX=9823 GN=ATP1A1 PE=1 SV=1	tr|D2WKD6|D2WKD6_PIG (+1)	2.11553	0.0256474
Adenylyl cyclase-associated protein OS=Sus scrofa OX=9823 GN=CAP2 PE=1 SV=3	tr|F1RUJ0|F1RUJ0_PIG	2.65017	0.0256933
Uncharacterized protein OS=Sus scrofa OX=9823 GN=MYO1D PE=1 SV=1	tr|A0A287ARN5|A0A287ARN5_PIG	#DIV/0!	0.0258464
Isocitrate dehydrogenase [NAD] subunit, mitochondrial OS=Sus scrofa OX=9823 GN=IDH3B PE=1 SV=1	tr|Q1G1K7|Q1G1K7_PIG	2.2422	0.0259363
cAMP-dependent protein kinase catalytic subunit alpha OS=Sus scrofa OX=9823 GN=PRKACA PE=3 SV=1	tr|A0A287ABM2|A0A287ABM2_PIG (+1)	2.8484	0.0259547
Heparin cofactor 2 OS=Sus scrofa OX=9823 GN=SERPIND1 PE=1 SV=1	tr|F1RKY2|F1RKY2_PIG	4.67432	0.026058
Uncharacterized protein OS=Sus scrofa OX=9823 PE=1 SV=2	tr|I3LFH1|I3LFH1_PIG	2.47398	0.0265662
Uncharacterized protein OS=Sus scrofa OX=9823 GN=CADPS PE=1 SV=1	tr|A0A286ZKF9|A0A286ZKF9_PIG	4.09139	0.0268048
Methylglutaconyl-CoA hydratase, mitochondrial isoform 1 OS=Sus scrofa OX=9823 GN=AUH PE=1 SV=3	tr|F1RN10|F1RN10_PIG	10.6738	0.0270997
Uncharacterized protein OS=Sus scrofa OX=9823 GN=CFH PE=1 SV=1	tr|A0A286ZJK1|A0A286ZJK1_PIG (+2)	9.95686	0.0273065
AP complex subunit sigma OS=Sus scrofa OX=9823 GN=AP2S1 PE=1 SV=1	tr|A0A287BIG4|A0A287BIG4_PIG	4.71005	0.0273798
Propionyl-CoA carboxylase beta chain, mitochondrial OS=Sus scrofa OX=9823 GN=PCCB PE=2 SV=1	sp|P79384|PCCB_PIG	#DIV/0!	0.0273939
Uncharacterized protein OS=Sus scrofa OX=9823 GN=NGEF PE=4 SV=1	tr|A0A287AV01|A0A287AV01_PIG (+1)	4.67379	0.0275983
Oxysterol-binding protein OS=Sus scrofa OX=9823 GN=OSBPL1A PE=1 SV=3	tr|F1SBB0|F1SBB0_PIG	4.39892	0.027748
Uncharacterized protein OS=Sus scrofa OX=9823 GN=SELENOI PE=1 SV=2	tr|I3L5E9|I3L5E9_PIG	5.32474	0.0278684
Uncharacterized protein OS=Sus scrofa OX=9823 GN=COPS5 PE=1 SV=1	tr|A0A287A976|A0A287A976_PIG (+1)	4.86705	0.0281113
Uncharacterized protein OS=Sus scrofa OX=9823 GN=LGI3 PE=1 SV=1	tr|A0A287BHH5|A0A287BHH5_PIG	#DIV/0!	0.0284507
Uncharacterized protein OS=Sus scrofa OX=9823 GN=ANKS1B PE=4 SV=1	tr|A0A287ABN9|A0A287ABN9_PIG (+1)	8.20522	0.0284932
Uncharacterized protein OS=Sus scrofa OX=9823 GN=PSMD6 PE=1 SV=3	tr|F1SGF1|F1SGF1_PIG	4.60539	0.0287889
Uncharacterized protein OS=Sus scrofa OX=9823 GN=EIF4G2 PE=1 SV=1	tr|A0A287BKE1|A0A287BKE1_PIG (+1)	#DIV/0!	0.0288007
Uncharacterized protein OS=Sus scrofa OX=9823 GN=MBLAC2 PE=1 SV=2	tr|F1RNZ3|F1RNZ3_PIG	#DIV/0!	0.0288007
ADP-ribosylation factor 4 OS=Sus scrofa OX=9823 GN=ARF4 PE=1 SV=1	tr|Q56P20|Q56P20_PIG	2.67643	0.0289986
Aconitate hydratase, mitochondrial OS=Sus scrofa OX=9823 GN=ACO2 PE=1 SV=1	sp|P16276|ACON_PIG	1.55388	0.029429
ELAV-like protein OS=Sus scrofa OX=9823 GN=ELAVL4 PE=3 SV=1	tr|A0A287BJB0|A0A287BJB0_PIG	5.69561	0.0294499
AP complex subunit beta OS=Sus scrofa OX=9823 GN=AP2B1 PE=1 SV=1	tr|A0A287AZ79|A0A287AZ79_PIG (+1)	2.4028	0.0299772
Dolichyl-diphosphooligosaccharide--protein glycosyltransferase 48 kDa subunit OS=Sus scrofa OX=9823 GN=DDOST PE=1 SV=2	tr|F1SU12|F1SU12_PIG	3.42474	0.0303509
Uncharacterized protein OS=Sus scrofa OX=9823 GN=SBF1 PE=1 SV=1	tr|A0A287B8L8|A0A287B8L8_PIG	4.98398	0.0305189
Uncharacterized protein OS=Sus scrofa OX=9823 GN=ADD3 PE=1 SV=1	tr|A0A287BQQ3|A0A287BQQ3_PIG	1.85975	0.030625
Uncharacterized protein OS=Sus scrofa OX=9823 GN=PI4KA PE=1 SV=1	tr|A0A286ZMT5|A0A286ZMT5_PIG (+3)	#DIV/0!	0.0318495
Uncharacterized protein OS=Sus scrofa OX=9823 GN=DNAJB1 PE=1 SV=1	tr|F1SCF5|F1SCF5_PIG	4.49702	0.0319576
Uncharacterized protein OS=Sus scrofa OX=9823 GN=HP1BP3 PE=1 SV=2	tr|F1SU06|F1SU06_PIG	4.49702	0.0319576
Uncharacterized protein OS=Sus scrofa OX=9823 GN=DYNC1H1 PE=1 SV=1	tr|A0A287B9W3|A0A287B9W3_PIG	3.20082	0.0321142
Uncharacterized protein OS=Sus scrofa OX=9823 GN=DCLK2 PE=1 SV=1	tr|A0A286ZZZ6|A0A286ZZZ6_PIG (+1)	#DIV/0!	0.0323317
Uncharacterized protein OS=Sus scrofa OX=9823 GN=ATL1 PE=1 SV=3	tr|F1SHX6|F1SHX6_PIG	3.12641	0.0325876
Uncharacterized protein OS=Sus scrofa OX=9823 GN=HK1 PE=1 SV=1	tr|A0A287A1G6|A0A287A1G6_PIG	1.8681	0.0327565
Uncharacterized protein OS=Sus scrofa OX=9823 GN=SEPT5 PE=3 SV=4	tr|F1RHN7|F1RHN7_PIG	2.18173	0.0330764
Uncharacterized protein OS=Sus scrofa OX=9823 GN=KIF21A PE=1 SV=3	tr|F1SHQ3|F1SHQ3_PIG	3.11371	0.0340206
Ficolin-2 OS=Sus scrofa OX=9823 GN=FCN2 PE=1 SV=1	sp|Q29041|FCN2_PIG (+1)	6.13516	0.0342367
Uncharacterized protein OS=Sus scrofa OX=9823 GN=SEC22B PE=1 SV=1	tr|A0A287A4A5|A0A287A4A5_PIG (+1)	4.16746	0.0342774
Uncharacterized protein OS=Sus scrofa OX=9823 GN=UBE2O PE=1 SV=1	tr|A0A287B778|A0A287B778_PIG	3.06851	0.0345308
Uncharacterized protein OS=Sus scrofa OX=9823 GN=SCCPDH PE=1 SV=3	tr|F1S8P1|F1S8P1_PIG	#DIV/0!	0.034749
Uncharacterized protein OS=Sus scrofa OX=9823 GN=C8G PE=1 SV=1	tr|A0A287AFQ4|A0A287AFQ4_PIG (+1)	6.48877	0.0350935
Uncharacterized protein OS=Sus scrofa OX=9823 GN=STX1A PE=1 SV=3	tr|F1RGA3|F1RGA3_PIG	2.90296	0.0351401
Guanine nucleotide-binding protein subunit gamma OS=Sus scrofa OX=9823 GN=GNG12 PE=2 SV=1	tr|B9TRW9|B9TRW9_PIG	0	0.035192
Inter-alpha-trypsin inhibitor heavy chain H1 OS=Sus scrofa OX=9823 GN=ITIH1 PE=1 SV=1	tr|A0A287B3S3|A0A287B3S3_PIG (+1)	5.33087	0.0356595
Glutathione peroxidase OS=Sus scrofa OX=9823 GN=GPX3 PE=1 SV=1	tr|A0A287AIJ3|A0A287AIJ3_PIG	5.26808	0.0357627
Uncharacterized protein OS=Sus scrofa OX=9823 GN=TBC1D24 PE=1 SV=1	tr|A0A286ZPP9|A0A286ZPP9_PIG (+1)	5.26808	0.0357627
40S ribosomal protein S4 OS=Sus scrofa OX=9823 GN=RPS4X PE=1 SV=1	tr|A0A287B771|A0A287B771_PIG (+1)	2.51156	0.035767
3-hydroxyisobutyrate dehydrogenase, mitochondrial OS=Sus scrofa OX=9823 GN=HIBADH PE=1 SV=3	tr|F1SHU0|F1SHU0_PIG	2.69673	0.0360239
Ethylmalonyl-CoA decarboxylase isoform X1 OS=Sus scrofa OX=9823 GN=ECHDC1 PE=1 SV=3	tr|F1S2X3|F1S2X3_PIG	2.84603	0.0360389
Adenosylhomocysteinase OS=Sus scrofa OX=9823 GN=AHCYL2 PE=1 SV=3	tr|F1SMQ4|F1SMQ4_PIG	4.34048	0.0367951
Uncharacterized protein OS=Sus scrofa OX=9823 GN=NCDN PE=4 SV=1	tr|A0A287BK50|A0A287BK50_PIG	2.09854	0.0371534
Sodium/potassium-transporting ATPase subunit alpha-2 OS=Sus scrofa OX=9823 GN=ATP1A2 PE=1 SV=1	sp|D2WKD8|AT1A2_PIG	2.00333	0.0372878
Uncharacterized protein OS=Sus scrofa OX=9823 GN=EFHD2 PE=1 SV=1	tr|F1SUW3|F1SUW3_PIG	#DIV/0!	0.0374823
Uncharacterized protein OS=Sus scrofa OX=9823 GN=GNA13 PE=1 SV=1	tr|A0A287A853|A0A287A853_PIG	4.18241	0.0378693
Uncharacterized protein OS=Sus scrofa OX=9823 GN=C8A PE=1 SV=3	tr|F1S788|F1S788_PIG	#DIV/0!	0.0379576
Uncharacterized protein OS=Sus scrofa OX=9823 GN=RAB18 PE=1 SV=1	tr|I3LC07|I3LC07_PIG	3.59436	0.0379617
Prolyl endopeptidase OS=Sus scrofa OX=9823 GN=PREP PE=1 SV=1	tr|A0A287AZX9|A0A287AZX9_PIG	2.80632	0.038126
Uncharacterized protein OS=Sus scrofa OX=9823 GN=LPCAT4 PE=4 SV=1	tr|A0A287AZE1|A0A287AZE1_PIG (+1)	#DIV/0!	0.038622
Uncharacterized protein OS=Sus scrofa OX=9823 GN=RAB5C PE=1 SV=1	tr|A0A287BN36|A0A287BN36_PIG	1.90036	0.0386815
Uncharacterized protein OS=Sus scrofa OX=9823 GN=PSMD9 PE=1 SV=1	tr|A0A286ZLP7|A0A286ZLP7_PIG	0	0.038685
Pyruvate dehydrogenase E1 component subunit alpha OS=Sus scrofa OX=9823 GN=PDHA1 PE=1 SV=1	tr|I3LCI2|I3LCI2_PIG	3.44913	0.0387132
Uncharacterized protein OS=Sus scrofa OX=9823 GN=RDH11 PE=1 SV=3	tr|F1SA24|F1SA24_PIG	4.16071	0.0390692
60S ribosomal protein L10a (Fragment) OS=Sus scrofa OX=9823 GN=RPL10A PE=2 SV=3	sp|P53027|RL10A_PIG	4.16071	0.0390692
Dynactin subunit 4 OS=Sus scrofa OX=9823 GN=DCTN4 PE=1 SV=1	tr|A0A286ZL98|A0A286ZL98_PIG (+1)	4.61509	0.0393025
Uncharacterized protein OS=Sus scrofa OX=9823 GN=ACOT4 PE=1 SV=1	tr|A0A286ZVQ0|A0A286ZVQ0_PIG	5.78962	0.039341
Uncharacterized protein OS=Sus scrofa OX=9823 GN=PSMD11 PE=1 SV=2	tr|F1RKW8|F1RKW8_PIG	3.9722	0.0396636
Uncharacterized protein OS=Sus scrofa OX=9823 GN=PTGES2 PE=1 SV=3	tr|F1RRY6|F1RRY6_PIG	#DIV/0!	0.040305
Amine oxidase OS=Sus scrofa OX=9823 GN=LOC110256000 PE=3 SV=3	tr|F1S1G8|F1S1G8_PIG	4.41865	0.0403845
Disintegrin and metalloproteinase domain-containing protein 22 isoform X7 OS=Sus scrofa OX=9823 GN=ADAM22 PE=1 SV=1	tr|A0A287BHK8|A0A287BHK8_PIG	3.57582	0.040508
60S ribosomal protein L14 OS=Sus scrofa OX=9823 GN=RPL14 PE=1 SV=1	sp|A1XQU3|RL14_PIG (+2)	4.54422	0.0405446
Isocitrate dehydrogenase [NADP], mitochondrial (Fragment) OS=Sus scrofa OX=9823 GN=IDH2 PE=1 SV=1	sp|P33198|IDHP_PIG (+2)	1.85581	0.0406761
Uncharacterized protein OS=Sus scrofa OX=9823 GN=FASN PE=1 SV=2	tr|I3LC73|I3LC73_PIG	3.14307	0.0406804
Uncharacterized protein OS=Sus scrofa OX=9823 PE=1 SV=3	tr|F1SSA6|F1SSA6_PIG	2.16785	0.040849
Uncharacterized protein OS=Sus scrofa OX=9823 PE=1 SV=1	tr|A0A287AMU3|A0A287AMU3_PIG	3.27433	0.0414432
Ras-related protein Rab-3A OS=Sus scrofa OX=9823 GN=RAB3A PE=2 SV=1	sp|Q06AU3|RAB3A_PIG	2.45355	0.0416553
Uncharacterized protein OS=Sus scrofa OX=9823 GN=FAM49B PE=1 SV=1	tr|A0A287BLQ0|A0A287BLQ0_PIG	2.52072	0.0420082
Complement factor I isoform 1 preproprotein OS=Sus scrofa OX=9823 GN=CFI PE=1 SV=1	tr|A0A287AQ20|A0A287AQ20_PIG (+2)	#DIV/0!	0.0420745
Uncharacterized protein OS=Sus scrofa OX=9823 GN=SYNJ1 PE=1 SV=1	tr|A0A286ZYK1|A0A286ZYK1_PIG	2.22412	0.0421313
Guanine nucleotide-binding protein G(I)/G(S)/G(T) subunit beta-1 isoform X1 OS=Sus scrofa OX=9823 GN=GNB1 PE=4 SV=2	tr|I3LSK5|I3LSK5_PIG	1.65931	0.042685
Uncharacterized protein OS=Sus scrofa OX=9823 GN=MPP6 PE=1 SV=1	tr|A0A287AYL1|A0A287AYL1_PIG (+1)	5.64732	0.043073
Uncharacterized protein OS=Sus scrofa OX=9823 GN=DIP2B PE=1 SV=2	tr|I3L8J8|I3L8J8_PIG	0.596413	0.0437247
Aldose 1-epimerase OS=Sus scrofa OX=9823 GN=GALM PE=2 SV=1	sp|Q9GKX6|GALM_PIG	2.82057	0.0438283
Uncharacterized protein OS=Sus scrofa OX=9823 GN=AGAP2 PE=4 SV=1	tr|A0A287AEF9|A0A287AEF9_PIG (+1)	3.95675	0.0438597
Uncharacterized protein OS=Sus scrofa OX=9823 GN=PTGES3 PE=1 SV=3	tr|F1SL99|F1SL99_PIG	2.87228	0.0442906
B-cell receptor-associated protein 31 isoform b OS=Sus scrofa OX=9823 GN=BCAP31 PE=1 SV=2	tr|F1S2A8|F1S2A8_PIG	3.90662	0.0446668
Cyclin-dependent kinase 5 OS=Sus scrofa OX=9823 GN=CDK5 PE=1 SV=2	tr|Q197W4|Q197W4_PIG	3.12589	0.0447624
Malic enzyme OS=Sus scrofa OX=9823 GN=ME2 PE=1 SV=3	tr|F1RPN9|F1RPN9_PIG	4.65557	0.0448018
Pyruvate kinase OS=Sus scrofa OX=9823 GN=PKM PE=1 SV=3	tr|F1SHL9|F1SHL9_PIG	3.87894	0.0450719
Actin-related protein 10 OS=Sus scrofa OX=9823 GN=ACTR10 PE=1 SV=1	tr|I3LHK5|I3LHK5_PIG	5.64005	0.0460148
Uncharacterized protein OS=Sus scrofa OX=9823 GN=RAPGEF2 PE=4 SV=1	tr|A0A287A643|A0A287A643_PIG	4.26765	0.0463045
Histone H4 OS=Sus scrofa OX=9823 PE=1 SV=2	sp|P62802|H4_PIG	1.504	0.0463072
Obg-like ATPase 1 OS=Sus scrofa OX=9823 GN=OLA1 PE=1 SV=3	tr|F1S062|F1S062_PIG	2.89213	0.0463415
Uncharacterized protein OS=Sus scrofa OX=9823 GN=EPHA4 PE=1 SV=3	tr|F1SR66|F1SR66_PIG	5.3784	0.0470799
60S acidic ribosomal protein P1 OS=Sus scrofa OX=9823 GN=RPLP1 PE=1 SV=1	tr|F1SIT7|F1SIT7_PIG	0.539959	0.0477941
Tetranectin OS=Sus scrofa OX=9823 GN=CLEC3B PE=1 SV=1	tr|F1SRC8|F1SRC8_PIG	3.07608	0.0481098
Alpha-enolase isoform 1 OS=Sus scrofa OX=9823 GN=ENO1 PE=1 SV=2	tr|I3LK59|I3LK59_PIG	1.55947	0.0481251
Electrogenic sodium bicarbonate cotransporter 1 OS=Sus scrofa OX=9823 GN=SLC4A4 PE=1 SV=1	sp|Q4U116|S4A4_PIG (+3)	2.8719	0.048262
Protein FAM49A isoform X1 OS=Sus scrofa OX=9823 GN=FAM49A PE=1 SV=1	tr|F2Z5E7|F2Z5E7_PIG	4.06029	0.0485361
Glutathione peroxidase OS=Sus scrofa OX=9823 GN=GPX1 PE=3 SV=1	tr|A0A287AG70|A0A287AG70_PIG	0.206168	0.0487811
Guanine nucleotide-binding protein G(Z) subunit alpha OS=Sus scrofa OX=9823 GN=GNAZ PE=1 SV=1	tr|F1RLT6|F1RLT6_PIG	2.88183	0.0489123
40S ribosomal protein S16 OS=Sus scrofa OX=9823 GN=RPS16 PE=1 SV=4	sp|Q29201|RS16_PIG	7.91572	0.048922
Uncharacterized protein OS=Sus scrofa OX=9823 GN=IQSEC1 PE=1 SV=1	tr|A0A287B765|A0A287B765_PIG	3.25852	0.0489351
UTP--glucose-1-phosphate uridylyltransferase OS=Sus scrofa OX=9823 GN=UGP2 PE=1 SV=3	tr|F1SIX3|F1SIX3_PIG	3.03258	0.0495646
Septin-4 isoform 1 OS=Sus scrofa OX=9823 GN=SEPT4 PE=1 SV=2	tr|F1RRN6|F1RRN6_PIG	2.58193	0.0502549
Amyloid-beta A4 protein OS=Sus scrofa OX=9823 GN=APP PE=2 SV=2	sp|P79307|A4_PIG (+2)	0.375275	0.0503268
Uncharacterized protein OS=Sus scrofa OX=9823 GN=PLXNA4 PE=4 SV=1	tr|A0A287APF0|A0A287APF0_PIG	4.10858	0.0506899
Mitochondrial pyruvate carrier OS=Sus scrofa OX=9823 GN=MPC2 PE=1 SV=3	tr|F1RPU8|F1RPU8_PIG	4.07482	0.0508226
Uncharacterized protein OS=Sus scrofa OX=9823 GN=SLC44A1 PE=1 SV=3	tr|F1SP53|F1SP53_PIG (+2)	4.1409	0.0509731
Uncharacterized protein OS=Sus scrofa OX=9823 GN=NEDD4L PE=1 SV=1	tr|A0A286ZR21|A0A286ZR21_PIG	4.58001	0.0510576
Elongation factor Ts, mitochondrial OS=Sus scrofa OX=9823 GN=TSFM PE=1 SV=1	tr|A0A287AVW2|A0A287AVW2_PIG	3.80504	0.0515445
C-1-tetrahydrofolate synthase, cytoplasmic OS=Sus scrofa OX=9823 GN=MTHFD1 PE=1 SV=3	tr|F1SA74|F1SA74_PIG	4.58774	0.0519544
Sodium/potassium-transporting ATPase subunit alpha OS=Sus scrofa OX=9823 GN=ATP1A3 PE=1 SV=1	tr|A0A286ZRK2|A0A286ZRK2_PIG (+1)	1.94009	0.0523704
Adenosylhomocysteinase OS=Sus scrofa OX=9823 GN=AHCY PE=3 SV=3	sp|Q710C4|SAHH_PIG (+1)	2.49294	0.0524504
Uncharacterized protein OS=Sus scrofa OX=9823 GN=RGS6 PE=1 SV=1	tr|A0A286ZUE2|A0A286ZUE2_PIG (+1)	5.27814	0.0527084
Uncharacterized protein OS=Sus scrofa OX=9823 PE=4 SV=1	tr|A0A287A8T9|A0A287A8T9_PIG (+1)	3.91291	0.0528358
NADH dehydrogenase [ubiquinone] flavoprotein 1, mitochondrial OS=Sus scrofa OX=9823 GN=NDUFV1 PE=1 SV=1	tr|F1RVN1|F1RVN1_PIG	2.63112	0.0531372
LanC-like protein 2 OS=Sus scrofa OX=9823 GN=LANCL2 PE=1 SV=1	tr|A0A287A9G0|A0A287A9G0_PIG	3.47302	0.0531922
Acetyl-CoA carboxylase 1 isoform X2 OS=Sus scrofa OX=9823 GN=ACACA PE=1 SV=1	tr|D2D0D8|D2D0D8_PIG	#DIV/0!	0.0538092
GTPase KRas isoform X2 OS=Sus scrofa OX=9823 GN=KRAS PE=1 SV=2	tr|I3LCQ9|I3LCQ9_PIG	2.45976	0.0538905
Uncharacterized protein OS=Sus scrofa OX=9823 GN=NDUFA13 PE=1 SV=3	tr|F1S6Q1|F1S6Q1_PIG	2.53572	0.0541643
T-complex protein 1 subunit epsilon OS=Sus scrofa OX=9823 GN=CCT5 PE=1 SV=2	tr|I3LR32|I3LR32_PIG	2.26396	0.0544845
Uncharacterized protein OS=Sus scrofa OX=9823 GN=ANK3 PE=1 SV=3	tr|F1RG02|F1RG02_PIG (+1)	2.49155	0.0550979
Beta-adducin OS=Sus scrofa OX=9823 GN=ADD2 PE=1 SV=1	tr|I3L5B0|I3L5B0_PIG	1.24667	0.0551185
Dolichyl-diphosphooligosaccharide--protein glycosyltransferase subunit 2 OS=Sus scrofa OX=9823 GN=RPN2 PE=2 SV=1	sp|Q9GL01|RPN2_PIG	3.24838	0.0552779
Heat shock 70 kDa protein 12A isoform 2 OS=Sus scrofa OX=9823 GN=HSPA12A PE=1 SV=1	tr|I3L8C5|I3L8C5_PIG	1.96144	0.0553844
Amino acid transporter OS=Sus scrofa OX=9823 GN=SLC1A2 PE=1 SV=1	tr|A0A287B178|A0A287B178_PIG	1.62369	0.0556755
Cysteine and histidine-rich domain-containing protein 1 OS=Sus scrofa OX=9823 GN=CHORDC1 PE=2 SV=1	sp|A9YUB1|CHRD1_PIG (+1)	4.50703	0.0557279
Malate dehydrogenase, cytoplasmic OS=Sus scrofa OX=9823 GN=MDH1 PE=1 SV=4	sp|P11708|MDHC_PIG	1.7211	0.0558418
Ermin isoform b OS=Sus scrofa OX=9823 GN=ERMN PE=1 SV=1	tr|A0A287AH29|A0A287AH29_PIG	0.116113	0.0559316
Eukaryotic translation initiation factor 2 subunit 1 OS=Sus scrofa OX=9823 GN=EIF2S1 PE=1 SV=1	tr|A0A287A096|A0A287A096_PIG	3.68105	0.0560664
Prothrombin OS=Sus scrofa OX=9823 GN=F2 PE=2 SV=1	sp|Q19AZ8|THRB_PIG (+1)	2.00841	0.056366
Collagen alpha-1(I) chain preproprotein OS=Sus scrofa OX=9823 GN=COL1A1 PE=1 SV=1	tr|A0A287A1S6|A0A287A1S6_PIG (+1)	0	0.056699
Vesicular glutamate transporter 1 OS=Sus scrofa OX=9823 GN=SLC17A7 PE=1 SV=2	tr|F1RHZ7|F1RHZ7_PIG	4.20865	0.0567404
Plasminogen OS=Sus scrofa OX=9823 GN=PLG PE=1 SV=3	sp|P06867|PLMN_PIG	3.39003	0.0574145
Uncharacterized protein OS=Sus scrofa OX=9823 GN=GPM6A PE=1 SV=2	tr|I3LFC7|I3LFC7_PIG	1.96125	0.0577051
Calcium-binding protein A9 OS=Sus scrofa OX=9823 GN=S100A9 PE=1 SV=1	tr|C3S7K6|C3S7K6_PIG	2.5641	0.0577072
Ras-related protein Ral-A isoform X1 OS=Sus scrofa OX=9823 GN=RALA PE=1 SV=1	tr|I3LAJ6|I3LAJ6_PIG	2.40004	0.0584065
Cytoplasmic dynein 1 light intermediate chain 1 isoform 1 OS=Sus scrofa OX=9823 GN=DYNC1LI1 PE=1 SV=1	tr|A0A287AIW3|A0A287AIW3_PIG	3.1503	0.0587008
GBI2 OS=Sus scrofa OX=9823 GN=GNAI2 PE=1 SV=1	tr|Q06AS6|Q06AS6_PIG	2.36683	0.0587559
Uncharacterized protein OS=Sus scrofa OX=9823 PE=4 SV=1	tr|A0A286ZJL9|A0A286ZJL9_PIG	2.54981	0.0591332
Catechol O-methyltransferase OS=Sus scrofa OX=9823 GN=COMT PE=1 SV=1	tr|A0A287AXW3|A0A287AXW3_PIG (+1)	1.74512	0.0593973
Acyl-CoA:lysophosphatidylglycerol acyltransferase 1 OS=Sus scrofa OX=9823 GN=LPGAT1 PE=1 SV=3	tr|F1S2U6|F1S2U6_PIG	3.7817	0.0594824
Peroxisomal multifunctional enzyme type 2 isoform 2 OS=Sus scrofa OX=9823 GN=HSD17B4 PE=1 SV=2	tr|I3LEF8|I3LEF8_PIG	2.4365	0.0595015
Rabphilin-3A isoform 1 OS=Sus scrofa OX=9823 GN=RPH3A PE=1 SV=1	tr|A0A287AX24|A0A287AX24_PIG	2.44839	0.0596088
Guanine nucleotide-binding protein G(O) subunit alpha isoform b OS=Sus scrofa OX=9823 GN=GNAO1 PE=1 SV=1	tr|A0A287A9G3|A0A287A9G3_PIG	3.62176	0.0604093
Uncharacterized protein OS=Sus scrofa OX=9823 GN=AARS PE=1 SV=3	tr|F1S431|F1S431_PIG	2.27437	0.0606449
Putative ubiquitin carboxyl-terminal hydrolase FAF-X isoform X2 OS=Sus scrofa OX=9823 GN=USP9X PE=1 SV=1	tr|A0A287ACW6|A0A287ACW6_PIG (+2)	4.13029	0.0609398
Neurofilament heavy polypeptide OS=Sus scrofa OX=9823 GN=NEFH PE=1 SV=1	tr|A0A287B1G9|A0A287B1G9_PIG	1.97926	0.0612997
Uncharacterized protein OS=Sus scrofa OX=9823 GN=NUDC PE=1 SV=1	tr|A0A287B8R2|A0A287B8R2_PIG	4.53611	0.0616315
Uncharacterized protein OS=Sus scrofa OX=9823 GN=ATP5PB PE=1 SV=1	tr|A0A286ZYM6|A0A286ZYM6_PIG	2.85213	0.0618954
Protein kinase C epsilon type OS=Sus scrofa OX=9823 GN=PRKCE PE=1 SV=2	tr|F1S5K7|F1S5K7_PIG	#DIV/0!	0.0619073
Uncharacterized protein OS=Sus scrofa OX=9823 GN=SURF4 PE=1 SV=1	tr|A0A286ZQW5|A0A286ZQW5_PIG	3.7891	0.0620994
Glyceraldehyde-3-phosphate dehydrogenase OS=Sus scrofa OX=9823 GN=GAPDH PE=1 SV=4	sp|P00355|G3P_PIG	1.3485	0.0621558
Uncharacterized protein OS=Sus scrofa OX=9823 GN=ACO1 PE=1 SV=1	tr|A0A287BQT2|A0A287BQT2_PIG (+1)	2.90543	0.0627658
Uncharacterized protein OS=Sus scrofa OX=9823 GN=CAMK2B PE=1 SV=1	tr|A0A286ZTV0|A0A286ZTV0_PIG (+1)	1.78559	0.0628606
Uncharacterized protein OS=Sus scrofa OX=9823 GN=CTBP1 PE=3 SV=1	tr|A0A287ABW5|A0A287ABW5_PIG	3.56755	0.0630918
Serotransferrin OS=Sus scrofa OX=9823 GN=TF PE=1 SV=2	sp|P09571|TRFE_PIG	1.89657	0.0638702
Protein kinase C OS=Sus scrofa OX=9823 GN=PRKCG PE=1 SV=3	tr|F1RNJ0|F1RNJ0_PIG	2.2253	0.0644004
Uncharacterized protein OS=Sus scrofa OX=9823 GN=CNTN1 PE=1 SV=3	tr|F1SHN1|F1SHN1_PIG	1.5364	0.0644855
Uncharacterized protein OS=Sus scrofa OX=9823 GN=TOMM22 PE=1 SV=2	tr|F1SLC2|F1SLC2_PIG	3.67379	0.0645894
Uncharacterized protein OS=Sus scrofa OX=9823 GN=FLOT2 PE=1 SV=2	tr|F1RNA6|F1RNA6_PIG (+1)	4.10374	0.064676
Uncharacterized protein OS=Sus scrofa OX=9823 GN=SERPINF2 PE=1 SV=1	tr|A0A287AJI4|A0A287AJI4_PIG (+1)	3.09552	0.0647309
Monocyte differentiation antigen CD14 OS=Sus scrofa OX=9823 GN=CD14 PE=1 SV=1	tr|A2SW51|A2SW51_PIG	4.04477	0.0649265
Uncharacterized protein OS=Sus scrofa OX=9823 GN=NCAM1 PE=1 SV=2	tr|K7GR86|K7GR86_PIG	1.98886	0.0654437
Uncharacterized protein OS=Sus scrofa OX=9823 GN=EHD1 PE=1 SV=1	tr|A0A287A229|A0A287A229_PIG	1.94999	0.0656591
Tubulin beta chain OS=Sus scrofa OX=9823 PE=1 SV=1	tr|F1S6M7|F1S6M7_PIG	1.28938	0.0659796
BTB/POZ domain-containing protein KCTD16 isoform X1 OS=Sus scrofa OX=9823 GN=KCTD16 PE=4 SV=1	tr|A0A287BF73|A0A287BF73_PIG	9.84781	0.0661829
Uncharacterized protein OS=Sus scrofa OX=9823 PE=1 SV=1	tr|A0A286ZQF6|A0A286ZQF6_PIG	1.72181	0.0664681
Leukotriene A(4) hydrolase OS=Sus scrofa OX=9823 GN=LTA4H PE=3 SV=3	tr|F1SQR8|F1SQR8_PIG	3.00268	0.066751
Uncharacterized protein OS=Sus scrofa OX=9823 GN=ARL8B PE=1 SV=1	tr|A0A287B0I4|A0A287B0I4_PIG	2.45439	0.066815
Guanine nucleotide-binding protein G(q) subunit alpha OS=Sus scrofa OX=9823 GN=GNAQ PE=2 SV=3	sp|Q2PKF4|GNAQ_PIG	1.96385	0.0668988
Uncharacterized protein OS=Sus scrofa OX=9823 GN=SEPT6 PE=1 SV=4	tr|F1RUA1|F1RUA1_PIG (+3)	3.74944	0.0672567
Emerin OS=Sus scrofa OX=9823 GN=EMD PE=4 SV=1	tr|A0A0U2ETD0|A0A0U2ETD0_PIG	0	0.0672914
Actin-related protein 3B isoform 1 OS=Sus scrofa OX=9823 GN=ACTR3B PE=1 SV=3	tr|F1SSP6|F1SSP6_PIG	1.94719	0.0684906
Uncharacterized protein OS=Sus scrofa OX=9823 GN=TPPP3 PE=1 SV=2	tr|F1S2I8|F1S2I8_PIG	0.215316	0.0690015
Uncharacterized protein OS=Sus scrofa OX=9823 GN=IVD PE=1 SV=2	tr|F1SSR4|F1SSR4_PIG	2.39273	0.0702439
Transporter OS=Sus scrofa OX=9823 GN=SLC6A17 PE=1 SV=3	tr|F1S617|F1S617_PIG	3.57384	0.0703775
Uncharacterized protein OS=Sus scrofa OX=9823 GN=PZP PE=1 SV=1	tr|A0A287BN06|A0A287BN06_PIG	3.66397	0.0704681
Transmembrane emp24 domain-containing protein 9 OS=Sus scrofa OX=9823 GN=TMED9 PE=1 SV=3	tr|F1S3E0|F1S3E0_PIG	2.55631	0.0708518
Antithrombin-III OS=Sus scrofa OX=9823 GN=SERPINC1 PE=1 SV=1	tr|F2Z5E2|F2Z5E2_PIG	2.43963	0.0712371
Rho guanine nucleotide exchange factor 2 OS=Sus scrofa OX=9823 GN=ARHGEF2 PE=4 SV=1	tr|A0A287A8R4|A0A287A8R4_PIG	2.37689	0.0712968
Elongation factor 2 OS=Sus scrofa OX=9823 GN=EEF2 PE=1 SV=1	tr|A0A287AWI9|A0A287AWI9_PIG	1.79609	0.0715246
60S ribosomal protein L22 OS=Sus scrofa OX=9823 GN=RPL22 PE=1 SV=2	sp|P67985|RL22_PIG	3.54737	0.0715402
Uncharacterized protein OS=Sus scrofa OX=9823 PE=4 SV=1	tr|A0A286ZXZ6|A0A286ZXZ6_PIG (+3)	3.44913	0.0718483
Uncharacterized protein OS=Sus scrofa OX=9823 GN=ADAP1 PE=4 SV=3	tr|F1RIX6|F1RIX6_PIG	2.52054	0.0730174
Uncharacterized protein OS=Sus scrofa OX=9823 GN=YKT6 PE=1 SV=1	tr|F1SSG1|F1SSG1_PIG	3.08476	0.0733724
Peptidylprolyl isomerase OS=Sus scrofa OX=9823 GN=FKBP3 PE=1 SV=2	tr|I3LR51|I3LR51_PIG	0.0415346	0.0734025
Beta-hexosaminidase OS=Sus scrofa OX=9823 GN=HEXA PE=1 SV=1	tr|A0A287A7V3|A0A287A7V3_PIG	0.401207	0.0734165
Beta-hexosaminidase OS=Sus scrofa OX=9823 GN=HEXA PE=1 SV=1	tr|A0A287A7V3|A0A287A7V3_PIG
Solute carrier family 2, facilitated glucose transporter member 3 OS=Sus scrofa OX=9823 GN=SLC2A3 PE=1 SV=2	tr|I3LG15|I3LG15_PIG (+1)	2.26154	0.0734693
Uncharacterized protein OS=Sus scrofa OX=9823 GN=CYTH2 PE=4 SV=1	tr|A0A287APG9|A0A287APG9_PIG (+1)	3.41829	0.0738581
Serine-threonine kinase receptor-associated protein OS=Sus scrofa OX=9823 GN=STRAP PE=1 SV=1	tr|I3LEQ7|I3LEQ7_PIG	1.97404	0.0740109
Uncharacterized protein OS=Sus scrofa OX=9823 GN=PHYHIPL PE=1 SV=1	tr|A0A287AA99|A0A287AA99_PIG	1.92967	0.0759653
Uncharacterized protein OS=Sus scrofa OX=9823 GN=PADI2 PE=1 SV=1	tr|A0A287B865|A0A287B865_PIG	3.56157	0.0760711
Transporter OS=Sus scrofa OX=9823 GN=SLC6A11 PE=1 SV=1	tr|A0A287AW15|A0A287AW15_PIG	4.1291	0.0760862
Uncharacterized protein OS=Sus scrofa OX=9823 GN=SET PE=1 SV=2	tr|F1RR69|F1RR69_PIG	0.234278	0.0761833
Uncharacterized protein OS=Sus scrofa OX=9823 GN=RAB4B PE=1 SV=1	tr|A0A287BCX1|A0A287BCX1_PIG (+1)	3.93235	0.0764927
Uncharacterized protein OS=Sus scrofa OX=9823 GN=GNB2 PE=1 SV=3	tr|F2Z4Z8|F2Z4Z8_PIG	1.63479	0.0769698
Staphylococcal nuclease domain-containing protein OS=Sus scrofa OX=9823 GN=SND1 PE=1 SV=2	tr|F1SML4|F1SML4_PIG	3.68747	0.0772945
Uncharacterized protein OS=Sus scrofa OX=9823 GN=PSMD7 PE=1 SV=1	tr|A0A287AEH0|A0A287AEH0_PIG	3.42506	0.077309
Uncharacterized protein OS=Sus scrofa OX=9823 GN=ALYREF PE=1 SV=1	tr|A0A287BET5|A0A287BET5_PIG	0.102046	0.0777037
Uncharacterized protein OS=Sus scrofa OX=9823 GN=KHSRP PE=1 SV=1	tr|A0A286ZY30|A0A286ZY30_PIG (+1)	0.0329902	0.0778655
Spectrin beta chain OS=Sus scrofa OX=9823 GN=SPTBN2 PE=3 SV=1	tr|A0A287B3A4|A0A287B3A4_PIG	2.32306	0.0779838
Peptidylprolyl isomerase OS=Sus scrofa OX=9823 GN=FKBP1A PE=4 SV=1	tr|Q2VTP6|Q2VTP6_PIG	0.371696	0.0781504
Exocyst complex component 2 OS=Sus scrofa OX=9823 GN=EXOC2 PE=1 SV=1	tr|F1RXP8|F1RXP8_PIG	#DIV/0!	0.0783582
Inhibitor of carbonic anhydrase OS=Sus scrofa OX=9823 GN=ICA PE=1 SV=1	sp|Q29545|ICA_PIG (+1)	4.16107	0.078701
Uncharacterized protein OS=Sus scrofa OX=9823 GN=YWHAB PE=1 SV=1	tr|F1SDR7|F1SDR7_PIG	1.92149	0.0790285
Peptidylprolyl isomerase OS=Sus scrofa OX=9823 GN=FKBP8 PE=1 SV=1	tr|A0A286ZS80|A0A286ZS80_PIG (+2)	3.51703	0.0793721
Serine/threonine-protein phosphatase 2A activator OS=Sus scrofa OX=9823 GN=PTPA PE=1 SV=1	tr|A0A286ZTF3|A0A286ZTF3_PIG (+1)	2.66877	0.0794269
AP complex subunit beta OS=Sus scrofa OX=9823 GN=AP1B1 PE=1 SV=1	tr|A0A287B5G9|A0A287B5G9_PIG (+1)	2.65378	0.0796939
Voltage-dependent anion-selective channel protein 1 OS=Sus scrofa OX=9823 GN=VDAC1 PE=2 SV=3	sp|Q9MZ16|VDAC1_PIG	1.97836	0.0801428
Uncharacterized protein OS=Sus scrofa OX=9823 GN=ACOT4 PE=1 SV=1	tr|A0A287B5Z7|A0A287B5Z7_PIG (+1)	2.58722	0.080407
Sodium/potassium-transporting ATPase subunit beta OS=Sus scrofa OX=9823 GN=ATP1B3 PE=1 SV=1	tr|A0A287AR12|A0A287AR12_PIG (+1)	3.65327	0.0807024
Ras-related protein Rab-2A isoform a OS=Sus scrofa OX=9823 GN=RAB2A PE=1 SV=3	tr|F1RT87|F1RT87_PIG	2.08067	0.0808269
Serine/threonine-protein phosphatase 2A 56 kDa regulatory subunit OS=Sus scrofa OX=9823 GN=PPP2R5D PE=1 SV=1	tr|A5GFQ9|A5GFQ9_PIG	3.37189	0.0815445
Uncharacterized protein OS=Sus scrofa OX=9823 GN=DLG2 PE=1 SV=1	tr|A0A287AN82|A0A287AN82_PIG (+1)	2.01025	0.0815555
Inter-alpha-trypsin inhibitor heavy chain H4 OS=Sus scrofa OX=9823 GN=ITIH4 PE=1 SV=1	tr|A0A286ZN24|A0A286ZN24_PIG (+1)	3.73285	0.0816037
Uncharacterized protein OS=Sus scrofa OX=9823 GN=XPO1 PE=1 SV=1	tr|A0A287BHC9|A0A287BHC9_PIG	4.97647	0.0817584
Ribose-phosphate pyrophosphokinase 1 isoform 1 OS=Sus scrofa OX=9823 GN=PRPS1 PE=1 SV=1	tr|F2Z572|F2Z572_PIG	2.16085	0.0821329
Adaptor protein phosphotyrosine interaction PH domain and leucine zipper containing 1 OS=Sus scrofa OX=9823 GN=APPL1 PE=2 SV=1	tr|B5LX40|B5LX40_PIG	2.19342	0.0835394
Vacuolar protein sorting 33A homolog OS=Sus scrofa OX=9823 GN=VPS33A PE=1 SV=1	tr|A5A780|A5A780_PIG	4.14962	0.0835561
Uncharacterized protein OS=Sus scrofa OX=9823 GN=ALDH3A2 PE=1 SV=1	tr|A0A287BBJ7|A0A287BBJ7_PIG	2.49701	0.0839884
Uncharacterized protein OS=Sus scrofa OX=9823 GN=OPCML PE=1 SV=1	tr|A0A286ZLA3|A0A286ZLA3_PIG	0.871698	0.0840381
Dihydropyrimidinase-related protein 2 isoform 1 OS=Sus scrofa OX=9823 GN=DPYSL2 PE=1 SV=1	tr|I3LJE2|I3LJE2_PIG	1.59347	0.0841916
Elongation factor 1-alpha 2 OS=Sus scrofa OX=9823 GN=EEF1A2 PE=3 SV=1	tr|A0A286ZNV2|A0A286ZNV2_PIG	1.34434	0.0848142
Uncharacterized protein OS=Sus scrofa OX=9823 GN=TFG PE=1 SV=1	tr|A0A287AB01|A0A287AB01_PIG (+1)	2.53655	0.0849686
Uncharacterized protein OS=Sus scrofa OX=9823 GN=PGM2L1 PE=1 SV=1	tr|A0A286ZWR7|A0A286ZWR7_PIG	7.81012	0.0850871
Uncharacterized protein OS=Sus scrofa OX=9823 PE=1 SV=1	tr|A0A287B626|A0A287B626_PIG	2.0973	0.0868596
Uncharacterized protein OS=Sus scrofa OX=9823 GN=RGS7 PE=1 SV=1	tr|A0A287A5H6|A0A287A5H6_PIG (+3)	2.76328	0.0871264
Haptoglobin OS=Sus scrofa OX=9823 GN=HP PE=1 SV=1	sp|Q8SPS7|HPT_PIG (+1)	0.421743	0.0873087
Uncharacterized protein OS=Sus scrofa OX=9823 GN=LOC106504545 PE=1 SV=2	tr|F1SCC9|F1SCC9_PIG	3.6716	0.0873273
Uncharacterized protein OS=Sus scrofa OX=9823 GN=TBCD PE=1 SV=3	tr|F1RZZ1|F1RZZ1_PIG	4.34432	0.0877464
Uncharacterized protein OS=Sus scrofa OX=9823 GN=ACOT9 PE=1 SV=2	tr|K7GPJ4|K7GPJ4_PIG	3.65457	0.0881324
Pyruvate dehydrogenase E1 component subunit beta OS=Sus scrofa OX=9823 GN=PDHB PE=1 SV=1	tr|F1SGH5|F1SGH5_PIG	2.38961	0.0882632
BCS1-like OS=Sus scrofa OX=9823 GN=BCS1L PE=1 SV=1	tr|A0A287AKM3|A0A287AKM3_PIG	3.82607	0.0883076
Phospholysine phosphohistidine inorganic pyrophosphate phosphatase OS=Sus scrofa OX=9823 GN=LHPP PE=1 SV=3	tr|F1SDP2|F1SDP2_PIG	2.35277	0.0888075
Uncharacterized protein OS=Sus scrofa OX=9823 GN=PDCD6 PE=1 SV=1	tr|A0A287AKU6|A0A287AKU6_PIG	2.12689	0.0894237
Na(+)/H(+) exchange regulatory cofactor NHE-RF OS=Sus scrofa OX=9823 GN=SLC9A3R1 PE=1 SV=1	tr|B8XH67|B8XH67_PIG	0.0605928	0.0895915
Eukaryotic initiation factor 4A-II OS=Sus scrofa OX=9823 GN=EIF4A2 PE=1 SV=1	tr|A6M930|A6M930_PIG	1.9966	0.0896204
Peptidyl-prolyl cis-trans isomerase OS=Sus scrofa OX=9823 GN=PPIB PE=1 SV=1	tr|A0A286ZW70|A0A286ZW70_PIG	1.91487	0.0896219
Uncharacterized protein OS=Sus scrofa OX=9823 GN=GABARAPL2 PE=1 SV=1	tr|F2Z5I0|F2Z5I0_PIG	2.42721	0.0896806
Tetraspanin OS=Sus scrofa OX=9823 GN=CD9 PE=1 SV=1	tr|I3LPR3|I3LPR3_PIG	2.98917	0.0900293
Serine/threonine-protein phosphatase OS=Sus scrofa OX=9823 GN=PPP5C PE=1 SV=3	tr|F1RM25|F1RM25_PIG	3.7907	0.0900422
Uncharacterized protein OS=Sus scrofa OX=9823 GN=DMTN PE=1 SV=2	tr|F1RMC1|F1RMC1_PIG	0.123668	0.0909343
Histone H2A OS=Sus scrofa OX=9823 GN=HIST2H2AB PE=1 SV=1	tr|F2Z5L6|F2Z5L6_PIG	3.28105	0.0914115
Uncharacterized protein OS=Sus scrofa OX=9823 GN=LOC396684 PE=1 SV=1	tr|A0A287BM11|A0A287BM11_PIG (+1)	3.27473	0.0914403
Cytochrome b-c1 complex subunit 2, mitochondrial OS=Sus scrofa OX=9823 GN=UQCRC2 PE=1 SV=3	tr|F1RPD2|F1RPD2_PIG	1.73698	0.091997
Triosephosphate isomerase OS=Sus scrofa OX=9823 GN=TPI1 PE=1 SV=1	tr|A0A288CFT0|A0A288CFT0_PIG (+1)	0.560952	0.0924968
Tyrosine-protein kinase OS=Sus scrofa OX=9823 GN=SRC PE=1 SV=2	tr|F1SEK8|F1SEK8_PIG (+1)	7.42901	0.0926849
EH domain-containing protein 3 OS=Sus scrofa OX=9823 GN=EHD3 PE=1 SV=1	tr|A0A287B1T2|A0A287B1T2_PIG	1.8164	0.0927481
Neurofilament light polypeptide OS=Sus scrofa OX=9823 GN=NEFL PE=1 SV=1	tr|A0A287A4Y1|A0A287A4Y1_PIG (+1)	1.90013	0.0932597
Uncharacterized protein OS=Sus scrofa OX=9823 GN=GARS PE=1 SV=1	tr|F1SII4|F1SII4_PIG	2.24471	0.0934062
Uncharacterized protein OS=Sus scrofa OX=9823 GN=SERPINH1 PE=1 SV=1	tr|A0A286ZRU9|A0A286ZRU9_PIG	0.527399	0.0938337
Serine/threonine-protein phosphatase 2A 56 kDa regulatory subunit OS=Sus scrofa OX=9823 GN=PPP2R5E PE=1 SV=2	tr|I3LGC0|I3LGC0_PIG	3.56906	0.094758
ATP synthase subunit OS=Sus scrofa OX=9823 PE=1 SV=1	tr|A0A287A725|A0A287A725_PIG	1.83331	0.0947604
Ras-related protein Rab-7a isoform X1 OS=Sus scrofa OX=9823 GN=RAB7A PE=1 SV=1	tr|A0A286ZP69|A0A286ZP69_PIG	1.71261	0.0951775
Neutrophil gelatinase-associated lipocalin OS=Sus scrofa OX=9823 GN=LCN2 PE=1 SV=2	tr|F1RRX1|F1RRX1_PIG	3.38694	0.0960513
Phosphatidylinositol 5-phosphate 4-kinase type-2 beta OS=Sus scrofa OX=9823 GN=PIP4K2B PE=1 SV=1	tr|A0A286ZQ65|A0A286ZQ65_PIG	2.44584	0.0961318
Uncharacterized protein OS=Sus scrofa OX=9823 GN=HSD17B12 PE=1 SV=2	tr|I3LE12|I3LE12_PIG (+1)	3.38469	0.0969586
Uncharacterized protein OS=Sus scrofa OX=9823 GN=RAB11B PE=1 SV=1	tr|F2Z5J9|F2Z5J9_PIG	2.22488	0.0980364
Uncharacterized protein OS=Sus scrofa OX=9823 GN=CAMK2G PE=1 SV=1	tr|A0A286ZVC8|A0A286ZVC8_PIG	2.11371	0.0985069
Eukaryotic initiation factor 4A-III OS=Sus scrofa OX=9823 GN=EIF4A3 PE=2 SV=1	sp|A6M931|IF4A3_PIG	3.17517	0.0986406
Isocitrate dehydrogenase [NADP] OS=Sus scrofa OX=9823 GN=IDH1 PE=1 SV=2	tr|I3LDC7|I3LDC7_PIG	2.64005	0.0986914
NADH dehydrogenase [ubiquinone] 1 alpha subcomplex subunit 10, mitochondrial OS=Sus scrofa OX=9823 GN=NDUFA10 PE=1 SV=1	tr|F1SIS9|F1SIS9_PIG	2.00131	0.0990719
T-complex protein 1 subunit delta OS=Sus scrofa OX=9823 GN=CCT4 PE=1 SV=1	tr|F1SQN1|F1SQN1_PIG	1.63807	0.099174
Uncharacterized protein OS=Sus scrofa OX=9823 GN=NUMBL PE=1 SV=2	tr|I3LAH3|I3LAH3_PIG	3.25492	0.100482
2-oxoisovalerate dehydrogenase subunit alpha OS=Sus scrofa OX=9823 GN=BCKDHA PE=1 SV=1	tr|A0A287ACH4|A0A287ACH4_PIG	3.25353	0.10062
Lamin-B2 OS=Sus scrofa OX=9823 GN=LMNB2 PE=1 SV=1	tr|I3LC25|I3LC25_PIG	3.61125	0.100912
Uncharacterized protein OS=Sus scrofa OX=9823 PE=1 SV=1	tr|A0A287B3U6|A0A287B3U6_PIG	0	0.101015
Calcium/calmodulin-dependent protein kinase type II subunit delta OS=Sus scrofa OX=9823 GN=CAMK2D PE=2 SV=1	sp|Q95266|KCC2D_PIG	2.11631	0.10181
Coatomer subunit delta OS=Sus scrofa OX=9823 GN=ARCN1 PE=1 SV=1	tr|A0A287AL76|A0A287AL76_PIG	3.72208	0.102074
Galactokinase OS=Sus scrofa OX=9823 GN=GALK1 PE=1 SV=3	tr|F1RVY7|F1RVY7_PIG	2.18793	0.102729
Alpha-1-antitrypsin OS=Sus scrofa OX=9823 GN=SERPINA1 PE=3 SV=2	tr|F1SCF0|F1SCF0_PIG	1.9526	0.102853
Adenylyl cyclase-associated protein OS=Sus scrofa OX=9823 GN=CAP1 PE=1 SV=2	tr|F1SMC0|F1SMC0_PIG	1.79459	0.103389
Uncharacterized protein OS=Sus scrofa OX=9823 GN=ROGDI PE=1 SV=1	tr|A0A286ZUL7|A0A286ZUL7_PIG	3.2447	0.103559
3-hydroxyisobutyryl-CoA hydrolase, mitochondrial OS=Sus scrofa OX=9823 GN=HIBCH PE=1 SV=1	tr|A0A286ZP38|A0A286ZP38_PIG (+3)	3.2447	0.103559
COP9 constitutive photomorphogenic-like subunit 2 OS=Sus scrofa OX=9823 GN=COPS2 PE=1 SV=1	tr|A7TX82|A7TX82_PIG	3.2447	0.103559
Uncharacterized protein OS=Sus scrofa OX=9823 GN=CARS PE=1 SV=3	tr|F1RYA3|F1RYA3_PIG	3.26807	0.103756
Uncharacterized protein OS=Sus scrofa OX=9823 GN=NDUFB4 PE=1 SV=1	tr|A0A287BPW8|A0A287BPW8_PIG	2.27114	0.10411
Phosphatidylinositol 5-phosphate 4-kinase type-2 alpha OS=Sus scrofa OX=9823 GN=PIP4K2A PE=2 SV=1	sp|O13010|PI42A_PIG (+1)	2.15692	0.104149
Uncharacterized protein OS=Sus scrofa OX=9823 GN=NDUFS1 PE=1 SV=1	tr|A0A287BLV7|A0A287BLV7_PIG	1.5814	0.104241
L-lactate dehydrogenase A chain OS=Sus scrofa OX=9823 GN=LDHA PE=1 SV=3	sp|P00339|LDHA_PIG	1.69234	0.104527
Peflin isoform 1 OS=Sus scrofa OX=9823 GN=PEF1 PE=1 SV=1	tr|A0A287AG15|A0A287AG15_PIG	3.25439	0.105225
Low molecular weight phosphotyrosine protein phosphatase OS=Sus scrofa OX=9823 GN=ACP1 PE=1 SV=3	tr|F1S9H9|F1S9H9_PIG	2.24517	0.105369
cAMP-dependent protein kinase catalytic subunit beta OS=Sus scrofa OX=9823 GN=PRKACB PE=3 SV=1	tr|A0A287AGH7|A0A287AGH7_PIG	2.24107	0.105416
Uncharacterized protein OS=Sus scrofa OX=9823 GN=CADM2 PE=1 SV=1	tr|A0A286ZWH9|A0A286ZWH9_PIG (+1)	1.48859	0.105948
Vacuolar protein sorting-associated protein 35 OS=Sus scrofa OX=9823 GN=VPS35 PE=1 SV=2	tr|I3LBB2|I3LBB2_PIG	2.52547	0.106988
ATP synthase subunit delta, mitochondrial OS=Sus scrofa OX=9823 GN=ATP5F1D PE=1 SV=1	tr|A0A286ZYL7|A0A286ZYL7_PIG	0.184079	0.108703
Biliverdin reductase A OS=Sus scrofa OX=9823 GN=BLVRA PE=1 SV=1	tr|F1SSF5|F1SSF5_PIG	2.49964	0.108756
Acidic leucine-rich nuclear phosphoprotein 32 family member A OS=Sus scrofa OX=9823 GN=ANP32A PE=1 SV=3	tr|F1SIV3|F1SIV3_PIG	0.315818	0.109689
Tubulin beta chain OS=Sus scrofa OX=9823 GN=TUBB4B PE=1 SV=1	tr|A0A287A275|A0A287A275_PIG	1.27685	0.110737
Uncharacterized protein OS=Sus scrofa OX=9823 GN=SEC13 PE=1 SV=3	tr|F1SQA9|F1SQA9_PIG	3.56503	0.111243
Uncharacterized protein OS=Sus scrofa OX=9823 GN=VGF PE=4 SV=1	tr|A0A287B049|A0A287B049_PIG	0	0.111303
Potassium voltage-gated channel subfamily A member 2 isoform X1 OS=Sus scrofa OX=9823 GN=Kcna2 PE=1 SV=1	tr|Q1AP78|Q1AP78_PIG	2.59836	0.113731
Serine/threonine-protein phosphatase OS=Sus scrofa OX=9823 GN=PPP2CB PE=3 SV=3	tr|F1RX68|F1RX68_PIG	1.62092	0.11378
Serine/threonine-protein phosphatase PP1-beta catalytic subunit OS=Sus scrofa OX=9823 GN=PPP1CB PE=1 SV=3	sp|P61292|PP1B_PIG	2.15392	0.114045
Calpain-1 catalytic subunit OS=Sus scrofa OX=9823 GN=CAPN1 PE=2 SV=3	sp|P35750|CAN1_PIG	3.21424	0.114594
Dynein light chain OS=Sus scrofa OX=9823 GN=LC8 PE=1 SV=1	tr|D9U8D1|D9U8D1_PIG	3.20427	0.114813
Dynein light chain OS=Sus scrofa OX=9823 GN=LC8 PE=1 SV=1	tr|D9U8D1|D9U8D1_PIG
Actin-related protein 3 isoform 1 OS=Sus scrofa OX=9823 GN=ACTR3 PE=1 SV=1	tr|F2Z5D2|F2Z5D2_PIG	2.04022	0.115012
Uncharacterized protein OS=Sus scrofa OX=9823 GN=USO1 PE=1 SV=1	tr|A0A287AJL0|A0A287AJL0_PIG	2.12683	0.115226
Uncharacterized protein OS=Sus scrofa OX=9823 GN=WDR37 PE=1 SV=1	tr|A0A287AJP9|A0A287AJP9_PIG	1.80916	0.116034
Uncharacterized protein OS=Sus scrofa OX=9823 GN=LOC100522401 PE=1 SV=3	tr|F1SDV2|F1SDV2_PIG	0	0.116117
Serine/arginine-rich splicing factor 1 OS=Sus scrofa OX=9823 GN=SRSF1 PE=2 SV=3	sp|Q3YLA6|SRSF1_PIG (+1)	0	0.116117
Anamorsin OS=Sus scrofa OX=9823 GN=CIAPIN1 PE=1 SV=2	tr|I3L704|I3L704_PIG	0	0.116117
Uncharacterized protein OS=Sus scrofa OX=9823 GN=GPRIN3 PE=1 SV=1	tr|A0A287BQF8|A0A287BQF8_PIG	0	0.116117
Uncharacterized protein OS=Sus scrofa OX=9823 GN=C1orf198 PE=1 SV=1	tr|A0A287A947|A0A287A947_PIG	0	0.116117
Uncharacterized protein OS=Sus scrofa OX=9823 GN=PTBP2 PE=1 SV=3	tr|F1S549|F1S549_PIG (+2)	0	0.116117
Uncharacterized protein OS=Sus scrofa OX=9823 GN=AMER2 PE=1 SV=2	tr|I3L7P3|I3L7P3_PIG	0	0.116117
Uncharacterized protein OS=Sus scrofa OX=9823 GN=CNPY4 PE=4 SV=1	tr|A0A287BQG2|A0A287BQG2_PIG	0	0.116117
Uncharacterized protein OS=Sus scrofa OX=9823 GN=PRR36 PE=4 SV=3	tr|F1SA83|F1SA83_PIG	0	0.116117
Uncharacterized protein OS=Sus scrofa OX=9823 GN=RAP1GAP2 PE=1 SV=1	tr|A0A287AA19|A0A287AA19_PIG (+1)	3.10526	0.116147
Uncharacterized protein OS=Sus scrofa OX=9823 PE=4 SV=1	tr|A0A286ZS17|A0A286ZS17_PIG	#DIV/0!	0.116149
Prostaglandin reductase 3 isoform 1 OS=Sus scrofa OX=9823 GN=ZADH2 PE=1 SV=1	tr|A0A287A6F5|A0A287A6F5_PIG	#DIV/0!	0.116236
Tubulin--tyrosine ligase OS=Sus scrofa OX=9823 GN=TTL PE=1 SV=1	sp|P38160|TTL_PIG (+1)	#DIV/0!	0.116236
Uncharacterized protein OS=Sus scrofa OX=9823 GN=STXBP3 PE=1 SV=1	tr|A0A286ZKN4|A0A286ZKN4_PIG (+2)	#DIV/0!	0.116236
Uncharacterized protein OS=Sus scrofa OX=9823 GN=ALPK3 PE=4 SV=1	tr|A0A286ZRH0|A0A286ZRH0_PIG (+1)	#DIV/0!	0.116236
Uncharacterized protein OS=Sus scrofa OX=9823 GN=CEP290 PE=4 SV=1	tr|A0A286ZYG8|A0A286ZYG8_PIG (+3)	#DIV/0!	0.116236
Uncharacterized protein OS=Sus scrofa OX=9823 GN=ECPAS PE=1 SV=1	tr|A0A287ARA7|A0A287ARA7_PIG	#DIV/0!	0.116236
Multifunctional fusion protein OS=Sus scrofa OX=9823 GN=KATNAL1 PE=1 SV=1	tr|F1RST8|F1RST8_PIG	#DIV/0!	0.116236
Uncharacterized protein OS=Sus scrofa OX=9823 GN=CMPK2 PE=1 SV=3	tr|F1S9L3|F1S9L3_PIG	#DIV/0!	0.116236
Uncharacterized protein OS=Sus scrofa OX=9823 PE=4 SV=1	tr|A0A286ZVT2|A0A286ZVT2_PIG	#DIV/0!	0.11641
Succinate--CoA ligase [ADP-forming] subunit beta, mitochondrial OS=Sus scrofa OX=9823 GN=SUCLA2 PE=1 SV=1	tr|A0A287AR48|A0A287AR48_PIG	2.05476	0.116458
ATPase inhibitor, mitochondrial OS=Sus scrofa OX=9823 GN=ATP5IF1 PE=3 SV=2	sp|Q29307|ATIF1_PIG	#DIV/0!	0.116553
Dynactin subunit 5 OS=Sus scrofa OX=9823 GN=DCTN5 PE=1 SV=1	tr|A0A286ZK88|A0A286ZK88_PIG	#DIV/0!	0.116553
Uncharacterized protein OS=Sus scrofa OX=9823 GN=PIK3R4 PE=1 SV=1	tr|A0A286ZQJ6|A0A286ZQJ6_PIG (+2)	#DIV/0!	0.116553
Uncharacterized protein OS=Sus scrofa OX=9823 GN=PITPNM1 PE=1 SV=1	tr|A0A286ZXL2|A0A286ZXL2_PIG (+1)	#DIV/0!	0.116553
Uncharacterized protein OS=Sus scrofa OX=9823 GN=CLPTM1 PE=1 SV=1	tr|A0A286ZY44|A0A286ZY44_PIG (+1)	#DIV/0!	0.116553
SH3 domain-binding glutamic acid-rich-like protein OS=Sus scrofa OX=9823 GN=SH3BGRL2 PE=1 SV=1	tr|A0A287ACE3|A0A287ACE3_PIG	#DIV/0!	0.116553
Glycylpeptide N-tetradecanoyltransferase OS=Sus scrofa OX=9823 GN=NMT2 PE=1 SV=1	tr|A0A287AGM3|A0A287AGM3_PIG	#DIV/0!	0.116553
Uncharacterized protein OS=Sus scrofa OX=9823 GN=ATAD3A PE=1 SV=3	tr|F1RJE4|F1RJE4_PIG	#DIV/0!	0.116553
Secretory carrier-associated membrane protein OS=Sus scrofa OX=9823 GN=SCAMP3 PE=1 SV=2	tr|F1RLJ4|F1RLJ4_PIG	#DIV/0!	0.116553
Uncharacterized protein OS=Sus scrofa OX=9823 GN=C2 PE=1 SV=2	tr|F1RQW7|F1RQW7_PIG	#DIV/0!	0.116553
Adenylate cyclase OS=Sus scrofa OX=9823 GN=ADCY2 PE=1 SV=3	tr|F1S0T0|F1S0T0_PIG	#DIV/0!	0.116553
Uncharacterized protein OS=Sus scrofa OX=9823 GN=FBXO3 PE=4 SV=3	tr|F1SGR6|F1SGR6_PIG	#DIV/0!	0.116553
Uncharacterized protein OS=Sus scrofa OX=9823 GN=H1FX PE=1 SV=1	tr|F1SPG1|F1SPG1_PIG	#DIV/0!	0.116553
Uncharacterized protein OS=Sus scrofa OX=9823 GN=TRIO PE=1 SV=3	tr|F1SRN4|F1SRN4_PIG	#DIV/0!	0.116553
Plexin-A1 OS=Sus scrofa OX=9823 GN=PLXNA1 PE=1 SV=1	tr|K9IVH9|K9IVH9_PIG	#DIV/0!	0.116553
Dolichyl-diphosphooligosaccharide--protein glycosyltransferase subunit DAD1 OS=Sus scrofa OX=9823 GN=DAD1 PE=3 SV=3	sp|Q29036|DAD1_PIG	#DIV/0!	0.116553
Cullin-4B isoform 2 OS=Sus scrofa OX=9823 GN=CUL4B PE=1 SV=1	tr|A0A286ZUX3|A0A286ZUX3_PIG	#DIV/0!	0.116553
Uncharacterized protein OS=Sus scrofa OX=9823 GN=RBM39 PE=1 SV=1	tr|A0A286ZZA4|A0A286ZZA4_PIG (+4)	#DIV/0!	0.116553
Phospholipid-transporting ATPase OS=Sus scrofa OX=9823 GN=ATP9A PE=1 SV=1	tr|A5GFS1|A5GFS1_PIG (+3)	#DIV/0!	0.116553
1-acyl-sn-glycerol-3-phosphate acyltransferase gamma isoform X1 OS=Sus scrofa OX=9823 GN=AGPAT3 PE=1 SV=1	tr|B8XTR1|B8XTR1_PIG	#DIV/0!	0.116553
Leucine-rich repeat-containing protein 73 isoform X1 OS=Sus scrofa OX=9823 GN=LRRC73 PE=1 SV=3	tr|F1RRL3|F1RRL3_PIG	#DIV/0!	0.116553
Spermidine synthase OS=Sus scrofa OX=9823 GN=SRM PE=1 SV=1	tr|I3LPB8|I3LPB8_PIG	#DIV/0!	0.116553
Uncharacterized protein OS=Sus scrofa OX=9823 GN=SLC30A3 PE=4 SV=2	tr|I3LSC3|I3LSC3_PIG	#DIV/0!	0.116553
Uncharacterized protein OS=Sus scrofa OX=9823 GN=LAMB2 PE=1 SV=1	tr|A0A287AJ64|A0A287AJ64_PIG (+3)	0	0.116661
Copine-5 isoform a OS=Sus scrofa OX=9823 GN=CPNE5 PE=4 SV=1	tr|A0A287A2T7|A0A287A2T7_PIG (+1)	#DIV/0!	0.116883
Uncharacterized protein OS=Sus scrofa OX=9823 GN=RAP1A PE=1 SV=3	tr|F2Z5K3|F2Z5K3_PIG	#DIV/0!	0.116994
60S ribosomal protein L35 OS=Sus scrofa OX=9823 GN=RPL35 PE=1 SV=3	sp|Q29361|RL35_PIG	#DIV/0!	0.117126
Protein tweety homolog OS=Sus scrofa OX=9823 GN=TTYH3 PE=1 SV=1	tr|A0A286ZK79|A0A286ZK79_PIG (+1)	#DIV/0!	0.117126
Enoyl-CoA delta isomerase 1, mitochondrial isoform 1 OS=Sus scrofa OX=9823 GN=ECI1 PE=1 SV=1	tr|A0A286ZLK7|A0A286ZLK7_PIG	#DIV/0!	0.117126
Uncharacterized protein OS=Sus scrofa OX=9823 GN=SORCS2 PE=1 SV=1	tr|A0A286ZMG6|A0A286ZMG6_PIG (+1)	#DIV/0!	0.117126
Transmembrane emp24 domain-containing protein 7 OS=Sus scrofa OX=9823 GN=TMED7 PE=1 SV=1	tr|A0A286ZPD7|A0A286ZPD7_PIG (+1)	#DIV/0!	0.117126
Uncharacterized protein OS=Sus scrofa OX=9823 GN=BSCL2 PE=4 SV=1	tr|A0A287B1Z9|A0A287B1Z9_PIG (+3)	#DIV/0!	0.117126
Brefeldin A-inhibited guanine nucleotide-exchange protein 3 isoform X1 OS=Sus scrofa OX=9823 GN=ARFGEF3 PE=1 SV=1	tr|A0A287BAG5|A0A287BAG5_PIG (+1)	#DIV/0!	0.117126
Uncharacterized protein OS=Sus scrofa OX=9823 GN=STUB1 PE=1 SV=1	tr|A0A287BGG6|A0A287BGG6_PIG (+1)	#DIV/0!	0.117126
Exocyst complex component 1 isoform X1 OS=Sus scrofa OX=9823 GN=EXOC1 PE=1 SV=1	tr|A0A286ZI44|A0A286ZI44_PIG (+5)	#DIV/0!	0.117126
O-acetyl-ADP-ribose deacetylase MACROD1 isoform X1 OS=Sus scrofa OX=9823 GN=MACROD1 PE=1 SV=1	tr|A0A286ZRX4|A0A286ZRX4_PIG (+1)	#DIV/0!	0.117126
Uncharacterized protein OS=Sus scrofa OX=9823 GN=CSNK1G3 PE=3 SV=1	tr|A0A286ZTG8|A0A286ZTG8_PIG (+2)	#DIV/0!	0.117126
Cleavage and polyadenylation specificity factor subunit 5 OS=Sus scrofa OX=9823 GN=NUDT21 PE=1 SV=1	tr|A0A286ZWI2|A0A286ZWI2_PIG	#DIV/0!	0.117126
Uncharacterized protein OS=Sus scrofa OX=9823 GN=PITPNC1 PE=1 SV=1	tr|A0A287A0P0|A0A287A0P0_PIG	#DIV/0!	0.117126
Uncharacterized protein OS=Sus scrofa OX=9823 GN=PSD PE=1 SV=1	tr|A0A287A0V7|A0A287A0V7_PIG (+1)	#DIV/0!	0.117126
Citramalyl-CoA lyase, mitochondrial isoform X1 OS=Sus scrofa OX=9823 GN=CLYBL PE=1 SV=3	tr|F1RP25|F1RP25_PIG	#DIV/0!	0.117126
Uncharacterized protein OS=Sus scrofa OX=9823 GN=LRRC8A PE=4 SV=1	tr|F1RR61|F1RR61_PIG	#DIV/0!	0.117126
Lupus La protein OS=Sus scrofa OX=9823 GN=SSB PE=1 SV=3	tr|F1S1V1|F1S1V1_PIG	#DIV/0!	0.117126
Mitochondrial-processing peptidase subunit beta OS=Sus scrofa OX=9823 GN=PMPCB PE=1 SV=1	tr|F1SB55|F1SB55_PIG	#DIV/0!	0.117126
Progressive ankylosis protein homolog OS=Sus scrofa OX=9823 GN=ANKH PE=1 SV=2	tr|F1SRN1|F1SRN1_PIG	#DIV/0!	0.117126
Uncharacterized protein OS=Sus scrofa OX=9823 GN=VPS26B PE=1 SV=2	tr|I3LHA3|I3LHA3_PIG	#DIV/0!	0.117126
Uncharacterized protein OS=Sus scrofa OX=9823 GN=DYNLT3 PE=1 SV=1	tr|I3LUI9|I3LUI9_PIG	#DIV/0!	0.117126
L-lactate dehydrogenase B chain OS=Sus scrofa OX=9823 GN=LDHB PE=1 SV=3	sp|P00336|LDHB_PIG	1.63184	0.117311
Uncharacterized protein OS=Sus scrofa OX=9823 GN=GPR37L1 PE=1 SV=1	tr|A0A286ZX16|A0A286ZX16_PIG	#DIV/0!	0.117451
Retinol dehydrogenase 13 isoform X1 OS=Sus scrofa OX=9823 GN=RDH13 PE=3 SV=1	tr|A0A286ZWN9|A0A286ZWN9_PIG	#DIV/0!	0.117597
Uncharacterized protein OS=Sus scrofa OX=9823 GN=CNTNAP2 PE=4 SV=1	tr|A0A287A9Q5|A0A287A9Q5_PIG	#DIV/0!	0.117597
Uncharacterized protein OS=Sus scrofa OX=9823 GN=HNRNPUL2 PE=1 SV=1	tr|A0A287APR9|A0A287APR9_PIG	#DIV/0!	0.117597
ADP-ribosylation factor 1 OS=Sus scrofa OX=9823 GN=ARF1 PE=1 SV=1	tr|C4MXZ1|C4MXZ1_PIG	#DIV/0!	0.117597
Maleylacetoacetate isomerase OS=Sus scrofa OX=9823 GN=GSTZ1 PE=1 SV=2	tr|F1S2N0|F1S2N0_PIG (+1)	#DIV/0!	0.117597
Neurexin-1 OS=Sus scrofa OX=9823 GN=NRXN1 PE=4 SV=2	tr|I3L8T0|I3L8T0_PIG	#DIV/0!	0.117597
Far upstream element-binding protein 1 isoform X2 OS=Sus scrofa OX=9823 GN=FUBP1 PE=1 SV=3	tr|F1S9S9|F1S9S9_PIG	0	0.117724
Ribulose-phosphate 3-epimerase OS=Sus scrofa OX=9823 GN=RPE PE=1 SV=1	tr|A0A286ZQY9|A0A286ZQY9_PIG	0	0.11787
Uncharacterized protein OS=Sus scrofa OX=9823 GN=SCG3 PE=1 SV=1	tr|A0A287AKS6|A0A287AKS6_PIG (+1)	0	0.117893
Uncharacterized protein OS=Sus scrofa OX=9823 GN=PCYOX1 PE=1 SV=2	tr|I3L9F5|I3L9F5_PIG	2.02056	0.117974
Trans-1,2-dihydrobenzene-1,2-diol dehydrogenase OS=Sus scrofa OX=9823 GN=DHDH PE=1 SV=1	sp|Q9TV69|DHDH_PIG	2.09736	0.118005
Uncharacterized protein OS=Sus scrofa OX=9823 GN=PIP5K1C PE=1 SV=1	tr|A0A287AQ94|A0A287AQ94_PIG	2.28951	0.118043
Uncharacterized protein OS=Sus scrofa OX=9823 GN=AP3M2 PE=1 SV=2	tr|F1SE19|F1SE19_PIG	2.67918	0.118219
Heterogeneous nuclear ribonucleoprotein D-like isoform b OS=Sus scrofa OX=9823 GN=HNRNPDL PE=1 SV=1	tr|A0A286ZYE7|A0A286ZYE7_PIG (+1)	0	0.118452
Uncharacterized protein OS=Sus scrofa OX=9823 GN=SNX27 PE=1 SV=1	tr|A0A286ZU70|A0A286ZU70_PIG (+3)	#DIV/0!	0.118547
Uncharacterized protein OS=Sus scrofa OX=9823 GN=AHNAK PE=1 SV=1	tr|A0A287A608|A0A287A608_PIG	0.20645	0.118735
Serine/threonine-protein phosphatase OS=Sus scrofa OX=9823 GN=PPP1CA PE=1 SV=1	tr|Q2EHH8|Q2EHH8_PIG	#DIV/0!	0.11927
Uncharacterized protein OS=Sus scrofa OX=9823 GN=LOC100153899 PE=1 SV=1	tr|A0A287ARJ8|A0A287ARJ8_PIG	#DIV/0!	0.119303
Intracellular hyaluronan-binding protein 4 OS=Sus scrofa OX=9823 GN=HABP4 PE=4 SV=1	tr|A0A287AR46|A0A287AR46_PIG	0	0.119378
Calpastatin OS=Sus scrofa OX=9823 GN=CAST PE=1 SV=1	tr|A0A288CFT7|A0A288CFT7_PIG	0	0.119378
6-phosphogluconate dehydrogenase, decarboxylating OS=Sus scrofa OX=9823 GN=PGD PE=1 SV=3	tr|F1RIF8|F1RIF8_PIG	2.39738	0.119382
Ferredoxin-2, mitochondrial OS=Sus scrofa OX=9823 GN=LOC100526209 PE=1 SV=1	tr|A0A287ACW7|A0A287ACW7_PIG	0	0.119409
Lysine--tRNA ligase OS=Sus scrofa OX=9823 GN=KARS PE=1 SV=1	tr|A0A287AKI9|A0A287AKI9_PIG	3.43179	0.119452
Uncharacterized protein OS=Sus scrofa OX=9823 GN=HTT PE=1 SV=1	tr|A0A286ZJ03|A0A286ZJ03_PIG (+2)	#DIV/0!	0.119555
Uncharacterized protein OS=Sus scrofa OX=9823 GN=SDR39U1 PE=1 SV=1	tr|A0A287A9T9|A0A287A9T9_PIG	#DIV/0!	0.119555
Uncharacterized protein OS=Sus scrofa OX=9823 GN=PLPP3 PE=1 SV=1	tr|A0A287BJK5|A0A287BJK5_PIG (+1)	#DIV/0!	0.119555
Small nuclear ribonucleoprotein Sm D1 OS=Sus scrofa OX=9823 GN=SNRPD1 PE=1 SV=1	tr|A0A287AHT5|A0A287AHT5_PIG (+1)	#DIV/0!	0.119555
Uncharacterized protein OS=Sus scrofa OX=9823 GN=SRSF4 PE=1 SV=3	tr|F1STL4|F1STL4_PIG	#DIV/0!	0.119555
Uncharacterized protein OS=Sus scrofa OX=9823 PE=4 SV=2	tr|I3L728|I3L728_PIG	#DIV/0!	0.119555
Casein kinase 2, alpha prime polypeptide OS=Sus scrofa OX=9823 GN=CSNK2A2 PE=1 SV=1	tr|K9IVE3|K9IVE3_PIG	#DIV/0!	0.119555
Secretogranin-1 OS=Sus scrofa OX=9823 GN=CHGB PE=1 SV=1	sp|Q9GLG4|SCG1_PIG	0	0.119909
Tubulin beta chain OS=Sus scrofa OX=9823 PE=1 SV=1	sp|P02554|TBB_PIG	1.25868	0.120549
Uncharacterized protein OS=Sus scrofa OX=9823 GN=MCAM PE=1 SV=2	tr|F1SAG9|F1SAG9_PIG (+1)	0	0.120583
Cystatin C OS=Sus scrofa OX=9823 GN=CST3 PE=1 SV=1	tr|Q0Z8R0|Q0Z8R0_PIG	0.469932	0.120923
Uncharacterized protein OS=Sus scrofa OX=9823 GN=SLC25A1 PE=1 SV=3	tr|F1RK74|F1RK74_PIG	#DIV/0!	0.120929
NADH dehydrogenase ubiquinone 1 beta subcomplex subunit 5, mitochondrial isoform 1 OS=Sus scrofa OX=9823 GN=NDUFB5 PE=1 SV=1	tr|F1SGC6|F1SGC6_PIG	#DIV/0!	0.120929
Kinase OS=Sus scrofa OX=9823 GN=ITPKA PE=3 SV=2	tr|F1SSV7|F1SSV7_PIG	#DIV/0!	0.120929
Cullin-5 OS=Sus scrofa OX=9823 GN=CUL5 PE=1 SV=1	tr|I3LFR2|I3LFR2_PIG	#DIV/0!	0.120929
Uncharacterized protein OS=Sus scrofa OX=9823 GN=CHL1 PE=1 SV=1	tr|A0A286ZQI5|A0A286ZQI5_PIG (+1)	0.267886	0.120971
Uncharacterized protein OS=Sus scrofa OX=9823 GN=CSDC2 PE=1 SV=1	tr|F1SRD7|F1SRD7_PIG	0	0.120985
Myosin-4 OS=Sus scrofa OX=9823 GN=MYH4 PE=2 SV=1	sp|Q9TV62|MYH4_PIG	0	0.121023
Amine oxidase OS=Sus scrofa OX=9823 GN=MAOA PE=1 SV=2	tr|F1RX00|F1RX00_PIG	4.09802	0.121127
Transgelin OS=Sus scrofa OX=9823 GN=TAGLN PE=1 SV=2	tr|F1SJS8|F1SJS8_PIG	0	0.121225
60S ribosomal protein L8 OS=Sus scrofa OX=9823 GN=RPL8 PE=1 SV=1	tr|F2Z567|F2Z567_PIG	#DIV/0!	0.121503
Uncharacterized protein OS=Sus scrofa OX=9823 PE=4 SV=1	tr|A0A287AXC8|A0A287AXC8_PIG	#DIV/0!	0.12186
Disintegrin and metalloproteinase domain-containing protein 23 preproprotein OS=Sus scrofa OX=9823 GN=ADAM23 PE=4 SV=3	tr|F1SHD2|F1SHD2_PIG	#DIV/0!	0.122609
Uncharacterized protein OS=Sus scrofa OX=9823 PE=4 SV=1	tr|A0A287B9X9|A0A287B9X9_PIG	1.87794	0.122676
Uncharacterized protein OS=Sus scrofa OX=9823 GN=RAB6B PE=1 SV=1	tr|A0A287BL65|A0A287BL65_PIG	2.15856	0.122687
Dual specificity mitogen-activated protein kinase kinase 1 OS=Sus scrofa OX=9823 GN=MAP2K1 PE=1 SV=1	tr|A0A287BK75|A0A287BK75_PIG	1.77076	0.122872
Ras-related protein Rab-15 isoform 2 OS=Sus scrofa OX=9823 GN=RAB15 PE=1 SV=2	tr|F1SA57|F1SA57_PIG	#DIV/0!	0.123066
Uncharacterized protein OS=Sus scrofa OX=9823 GN=RAB39B PE=1 SV=1	tr|F2Z552|F2Z552_PIG	#DIV/0!	0.123066
cAMP-dependent protein kinase regulatory subunit type II alpha OS=Sus scrofa OX=9823 GN=PRKAR2A PE=1 SV=1	tr|C1PIG4|C1PIG4_PIG	1.452	0.123478
Uncharacterized protein OS=Sus scrofa OX=9823 GN=NIPSNAP2 PE=1 SV=1	tr|A0A287ABB8|A0A287ABB8_PIG	#DIV/0!	0.123927
Tubulin alpha chain OS=Sus scrofa OX=9823 GN=TUBA4A PE=1 SV=1	tr|A0A286ZNY1|A0A286ZNY1_PIG (+1)	1.59114	0.123953
Dynamin-2 isoform 4 OS=Sus scrofa OX=9823 GN=DNM2 PE=1 SV=1	tr|A0A287B0K6|A0A287B0K6_PIG (+1)	#DIV/0!	0.124012
Mitochondrial proton/calcium exchanger protein OS=Sus scrofa OX=9823 GN=LETM1 PE=1 SV=3	tr|F1S9F3|F1S9F3_PIG	1.83638	0.124101
Uncharacterized protein OS=Sus scrofa OX=9823 GN=NACAD PE=1 SV=3	tr|F1ST62|F1ST62_PIG	0	0.124147
Uncharacterized protein OS=Sus scrofa OX=9823 GN=AKT1S1 PE=4 SV=2	tr|F1RHU2|F1RHU2_PIG	0	0.124147
Uncharacterized protein OS=Sus scrofa OX=9823 GN=CETN2 PE=1 SV=2	tr|F2Z563|F2Z563_PIG	0	0.124147
Uncharacterized protein OS=Sus scrofa OX=9823 GN=DDT PE=1 SV=1	tr|A0A287A278|A0A287A278_PIG	0	0.124194
Uncharacterized protein OS=Sus scrofa OX=9823 GN=IGSF1 PE=4 SV=3	tr|F1RTF8|F1RTF8_PIG (+2)	0	0.124194
Uncharacterized protein OS=Sus scrofa OX=9823 GN=WASHC1 PE=1 SV=2	tr|F1SK83|F1SK83_PIG	0	0.124194
Sodium channel protein OS=Sus scrofa OX=9823 GN=SCN2A PE=3 SV=1	tr|A0A287AUP2|A0A287AUP2_PIG (+1)	2.48257	0.124671
Uncharacterized protein OS=Sus scrofa OX=9823 GN=GLS PE=1 SV=1	tr|A0A287BFF4|A0A287BFF4_PIG	1.90109	0.124681
Uncharacterized protein OS=Sus scrofa OX=9823 GN=RIMS1 PE=1 SV=3	tr|F1RTS7|F1RTS7_PIG	3.8711	0.125069
Uncharacterized protein OS=Sus scrofa OX=9823 GN=NID1 PE=1 SV=3	tr|F1RGY5|F1RGY5_PIG	#DIV/0!	0.12512
Uncharacterized protein OS=Sus scrofa OX=9823 GN=LARS PE=1 SV=3	tr|F1RM15|F1RM15_PIG (+1)	#DIV/0!	0.12512
Uncharacterized protein OS=Sus scrofa OX=9823 GN=MCU PE=1 SV=1	tr|A0A286ZJJ4|A0A286ZJJ4_PIG (+2)	#DIV/0!	0.12512
Uncharacterized protein OS=Sus scrofa OX=9823 GN=CCDC22 PE=1 SV=1	tr|A0A286ZPM3|A0A286ZPM3_PIG (+2)	#DIV/0!	0.12512
Uncharacterized protein OS=Sus scrofa OX=9823 GN=TRPV2 PE=1 SV=1	tr|A0A287A0Z9|A0A287A0Z9_PIG (+2)	#DIV/0!	0.12512
Serine protease HTRA2, mitochondrial isoform 1 preproprotein OS=Sus scrofa OX=9823 GN=HTRA2 PE=4 SV=1	tr|A0A287A6X5|A0A287A6X5_PIG	#DIV/0!	0.12512
Uncharacterized protein OS=Sus scrofa OX=9823 GN=TTC7B PE=1 SV=1	tr|A0A287ADK4|A0A287ADK4_PIG (+3)	#DIV/0!	0.12512
Uncharacterized protein OS=Sus scrofa OX=9823 GN=AARS2 PE=1 SV=1	tr|A0A287B287|A0A287B287_PIG (+1)	#DIV/0!	0.12512
Uncharacterized protein OS=Sus scrofa OX=9823 GN=ADGRB1 PE=3 SV=1	tr|A0A287BET6|A0A287BET6_PIG	#DIV/0!	0.12512
Importin subunit alpha OS=Sus scrofa OX=9823 GN=KPNA3 PE=1 SV=1	tr|C6K7I1|C6K7I1_PIG	#DIV/0!	0.12512
Uncharacterized protein OS=Sus scrofa OX=9823 PE=4 SV=3	tr|F1RQP6|F1RQP6_PIG	#DIV/0!	0.12512
Uncharacterized protein OS=Sus scrofa OX=9823 GN=UBE3C PE=1 SV=3	tr|F1SHV8|F1SHV8_PIG	#DIV/0!	0.12512
Basic leucine zipper and W2 domain-containing protein 1 OS=Sus scrofa OX=9823 GN=BZW1 PE=1 SV=2	tr|F1SI55|F1SI55_PIG	#DIV/0!	0.12512
Uncharacterized protein OS=Sus scrofa OX=9823 GN=TIGAR PE=4 SV=2	tr|F1SKZ0|F1SKZ0_PIG	#DIV/0!	0.12512
Uncharacterized protein OS=Sus scrofa OX=9823 GN=GUCY1A2 PE=1 SV=2	tr|I3L9I5|I3L9I5_PIG (+1)	#DIV/0!	0.12512
Medium-chain specific acyl-CoA dehydrogenase, mitochondrial OS=Sus scrofa OX=9823 GN=ACADM PE=1 SV=3	sp|P41367|ACADM_PIG (+1)	#DIV/0!	0.12512
Uncharacterized protein OS=Sus scrofa OX=9823 GN=WDFY1 PE=1 SV=2	tr|I3LBP0|I3LBP0_PIG	#DIV/0!	0.12512
Uncharacterized protein OS=Sus scrofa OX=9823 PE=4 SV=1	tr|A0A287ACY6|A0A287ACY6_PIG (+1)	#DIV/0!	0.125287
Amine oxidase OS=Sus scrofa OX=9823 GN=MAOB PE=1 SV=2	tr|I3LEH4|I3LEH4_PIG (+1)	2.43325	0.125743
Uncharacterized protein OS=Sus scrofa OX=9823 GN=APMAP PE=1 SV=1	tr|A0A287A6K7|A0A287A6K7_PIG	1.9879	0.125811
Clathrin light chain OS=Sus scrofa OX=9823 GN=CLTA PE=3 SV=1	tr|A0A286ZLL7|A0A286ZLL7_PIG (+1)	0.100515	0.125986
Uncharacterized protein OS=Sus scrofa OX=9823 GN=PSD3 PE=4 SV=1	tr|A0A287AUU8|A0A287AUU8_PIG	3.09392	0.126211
Uncharacterized protein OS=Sus scrofa OX=9823 GN=RAB3B PE=4 SV=1	tr|F1S6G3|F1S6G3_PIG	#DIV/0!	0.126223
Uncharacterized protein OS=Sus scrofa OX=9823 GN=LCP1 PE=1 SV=1	tr|A0A287ANV7|A0A287ANV7_PIG (+1)	2.43103	0.126418
Tubulin beta chain OS=Sus scrofa OX=9823 GN=TUBB4A PE=1 SV=2	tr|F2Z5K5|F2Z5K5_PIG	1.29701	0.126579
Uncharacterized protein OS=Sus scrofa OX=9823 GN=TPD52L2 PE=1 SV=1	tr|A0A287B0P4|A0A287B0P4_PIG	0	0.127019
Pterin-4-alpha-carbinolamine dehydratase 2 OS=Sus scrofa OX=9823 GN=PCBD2 PE=1 SV=2	tr|I3LUU1|I3LUU1_PIG	0	0.127019
SRSF protein kinase 2 isoform X6 OS=Sus scrofa OX=9823 GN=SRPK2 PE=1 SV=1	tr|A0A287AP93|A0A287AP93_PIG	#DIV/0!	0.127218
Uncharacterized protein OS=Sus scrofa OX=9823 GN=PPP1R21 PE=1 SV=1	tr|A0A287BL34|A0A287BL34_PIG (+2)	#DIV/0!	0.127218
Uncharacterized protein OS=Sus scrofa OX=9823 GN=HSDL2 PE=1 SV=2	tr|F1SNA8|F1SNA8_PIG	#DIV/0!	0.127218
Exocyst complex component 5 OS=Sus scrofa OX=9823 GN=EXOC5 PE=1 SV=3	tr|F1SSM0|F1SSM0_PIG	#DIV/0!	0.127218
Serum amyloid P-component OS=Sus scrofa OX=9823 GN=APCS PE=2 SV=1	sp|O19063|SAMP_PIG	#DIV/0!	0.127218
Oxysterol-binding protein OS=Sus scrofa OX=9823 GN=OSBPL2 PE=3 SV=1	tr|A0A286ZQP4|A0A286ZQP4_PIG	#DIV/0!	0.127218
Uncharacterized protein OS=Sus scrofa OX=9823 GN=FLII PE=4 SV=1	tr|A0A286ZRM3|A0A286ZRM3_PIG (+1)	#DIV/0!	0.127218
Uncharacterized protein OS=Sus scrofa OX=9823 GN=ABHD6 PE=1 SV=1	tr|A0A287A2V4|A0A287A2V4_PIG (+1)	#DIV/0!	0.127218
Uncharacterized protein OS=Sus scrofa OX=9823 GN=DIRAS1 PE=1 SV=1	tr|A0A287AMJ2|A0A287AMJ2_PIG	#DIV/0!	0.127218
Mitochondrial amidoxime reducing component 2 OS=Sus scrofa OX=9823 GN=MARC2 PE=1 SV=1	tr|A0A287B462|A0A287B462_PIG	#DIV/0!	0.127218
DnaJ homolog subfamily C member 11 OS=Sus scrofa OX=9823 GN=DNAJC11 PE=1 SV=3	tr|F1RIJ5|F1RIJ5_PIG	#DIV/0!	0.127218
Uncharacterized protein OS=Sus scrofa OX=9823 GN=ARHGEF7 PE=1 SV=3	tr|F1RLL1|F1RLL1_PIG	#DIV/0!	0.127218
Uncharacterized protein OS=Sus scrofa OX=9823 GN=MBOAT7 PE=1 SV=3	tr|F1RNH0|F1RNH0_PIG	#DIV/0!	0.127218
Uncharacterized protein OS=Sus scrofa OX=9823 GN=CAPN5 PE=1 SV=2	tr|F1SUK6|F1SUK6_PIG	#DIV/0!	0.127218
Uncharacterized protein OS=Sus scrofa OX=9823 GN=PTPRA PE=1 SV=1	tr|A0A286ZQS0|A0A286ZQS0_PIG (+3)	#DIV/0!	0.128175
Uncharacterized protein OS=Sus scrofa OX=9823 PE=4 SV=1	tr|A0A287BC47|A0A287BC47_PIG	#DIV/0!	0.128324
Uncharacterized protein OS=Sus scrofa OX=9823 GN=LSP1 PE=4 SV=1	tr|A0A287AFG3|A0A287AFG3_PIG (+1)	0	0.128325
Major prion protein OS=Sus scrofa OX=9823 GN=PRNP PE=1 SV=1	sp|P49927|PRIO_PIG (+1)	3.0192	0.128452
Immunoglobulin heavy constant delta OS=Sus scrofa OX=9823 GN=IGHD PE=4 SV=1	tr|A0A286ZX24|A0A286ZX24_PIG	#DIV/0!	0.129006
Cdc42 effector protein 4 OS=Sus scrofa OX=9823 GN=CDC42EP4 PE=1 SV=1	tr|F1RV35|F1RV35_PIG	0	0.129067
Synapse-associated protein 1 OS=Sus scrofa OX=9823 GN=SYAP1 PE=1 SV=1	tr|A0A287AX76|A0A287AX76_PIG	0	0.129126
Serine--tRNA ligase, cytoplasmic isoform a OS=Sus scrofa OX=9823 GN=SARS PE=1 SV=3	tr|F1S5Z3|F1S5Z3_PIG	1.73138	0.12924
Uncharacterized protein OS=Sus scrofa OX=9823 GN=GPS1 PE=4 SV=1	tr|A0A287A6E6|A0A287A6E6_PIG (+2)	#DIV/0!	0.129311
Leucine-rich repeat-containing protein 57 OS=Sus scrofa OX=9823 GN=LRRC57 PE=1 SV=1	tr|F1SI25|F1SI25_PIG	#DIV/0!	0.129311
Uncharacterized protein OS=Sus scrofa OX=9823 GN=DNAJA4 PE=1 SV=1	tr|A0A287AI67|A0A287AI67_PIG (+1)	#DIV/0!	0.129311
Gelsolin OS=Sus scrofa OX=9823 GN=GSN PE=4 SV=1	tr|A0A286ZSM7|A0A286ZSM7_PIG	1.94761	0.129478
Stathmin OS=Sus scrofa OX=9823 GN=STMN2 PE=3 SV=2	tr|K7GMK4|K7GMK4_PIG	0	0.129799
Glutathione synthetase OS=Sus scrofa OX=9823 GN=GSS PE=1 SV=2	tr|F1S4X9|F1S4X9_PIG	3.03478	0.129925
Uncharacterized protein OS=Sus scrofa OX=9823 GN=ALDH1B1 PE=1 SV=1	tr|F1ST54|F1ST54_PIG	#DIV/0!	0.13055
Kinesin-like protein OS=Sus scrofa OX=9823 GN=KIF2A PE=1 SV=1	tr|A0A287AEN0|A0A287AEN0_PIG	2.19598	0.131022
Multifunctional methyltransferase subunit TRM112-like protein isoform X1 OS=Sus scrofa OX=9823 GN=TRMT112 PE=1 SV=1	tr|A0A287B938|A0A287B938_PIG (+1)	0	0.131746
Family with sequence similarity 126 member B OS=Sus scrofa OX=9823 GN=FAM126B PE=1 SV=1	tr|A0A287A4F1|A0A287A4F1_PIG	0	0.131746
Uncharacterized protein OS=Sus scrofa OX=9823 GN=DYNC1I1 PE=1 SV=1	tr|A0A286ZMQ6|A0A286ZMQ6_PIG	2.12192	0.131782
Perilipin OS=Sus scrofa OX=9823 GN=PLIN3 PE=1 SV=1	tr|K4P7U5|K4P7U5_PIG	0	0.131809
Uncharacterized protein OS=Sus scrofa OX=9823 GN=PTPRK PE=1 SV=1	tr|A0A286ZLL2|A0A286ZLL2_PIG (+5)	0	0.131809
Uncharacterized protein OS=Sus scrofa OX=9823 GN=NEO1 PE=1 SV=1	tr|A0A287BEC8|A0A287BEC8_PIG	0	0.131809
Uncharacterized protein OS=Sus scrofa OX=9823 GN=PUM1 PE=4 SV=1	tr|A0A286ZRN9|A0A286ZRN9_PIG (+3)	0	0.131809
Uncharacterized protein OS=Sus scrofa OX=9823 GN=NUP62 PE=1 SV=1	tr|A0A287AZ57|A0A287AZ57_PIG	0	0.131809
Elongation factor 1-gamma OS=Sus scrofa OX=9823 GN=EEF1G PE=4 SV=2	tr|F1RPW9|F1RPW9_PIG	1.62076	0.131853
Rabankyrin-5 isoform 4 OS=Sus scrofa OX=9823 GN=ANKFY1 PE=1 SV=2	tr|F1RGQ6|F1RGQ6_PIG	#DIV/0!	0.13211
Prefoldin subunit 2 OS=Sus scrofa OX=9823 GN=PFDN2 PE=1 SV=1	tr|F1S192|F1S192_PIG	0.352639	0.13397
Uncharacterized protein OS=Sus scrofa OX=9823 PE=4 SV=1	tr|A0A286ZK70|A0A286ZK70_PIG	0	0.134085
Copine-4 isoform 1 OS=Sus scrofa OX=9823 GN=CPNE4 PE=1 SV=3	tr|F1RX25|F1RX25_PIG (+1)	#DIV/0!	0.134211
Hepatocyte growth factor activator isoform 2 preproprotein OS=Sus scrofa OX=9823 GN=HGFAC PE=1 SV=1	tr|A0A286ZMW3|A0A286ZMW3_PIG (+1)	#DIV/0!	0.134424
Uncharacterized protein OS=Sus scrofa OX=9823 PE=4 SV=1	tr|A0A286ZXD4|A0A286ZXD4_PIG (+2)	2.09378	0.134497
Cytochrome c oxidase subunit 4 isoform 1, mitochondrial OS=Sus scrofa OX=9823 GN=COX4I1 PE=1 SV=2	tr|I3LER5|I3LER5_PIG	1.92275	0.134558
Synaptophysin OS=Sus scrofa OX=9823 GN=SYP PE=1 SV=1	tr|F1RW46|F1RW46_PIG	1.9289	0.134739
ADP-ribosylation factor-like protein 2 isoform 1 OS=Sus scrofa OX=9823 GN=ARL2 PE=1 SV=1	tr|A0A287B226|A0A287B226_PIG	#DIV/0!	0.134779
Protein S100-A12 OS=Sus scrofa OX=9823 GN=S100A12 PE=1 SV=2	sp|P80310|S10AC_PIG	#DIV/0!	0.134779
Glycylpeptide N-tetradecanoyltransferase OS=Sus scrofa OX=9823 GN=NMT1 PE=1 SV=1	tr|A0A287AI66|A0A287AI66_PIG	#DIV/0!	0.134779
Mitochondrial carrier homolog 1 PSAP-LL OS=Sus scrofa OX=9823 GN=MTCH1 PE=1 SV=1	tr|F1RVS8|F1RVS8_PIG	#DIV/0!	0.134779
5-aminoimidazole-4-carboxamide ribonucleotide formyltransferase/IMP cyclohydrolase OS=Sus scrofa OX=9823 GN=purH PE=1 SV=1	tr|B3VMR0|B3VMR0_PIG	#DIV/0!	0.134779
Tubulin beta chain OS=Sus scrofa OX=9823 GN=TUBB PE=2 SV=1	sp|Q767L7|TBB5_PIG (+1)	1.22941	0.135768
Antioxidant protein 1 homolog (Yeast) OS=Sus scrofa OX=9823 GN=ATOX1 PE=1 SV=1	tr|D0G0C7|D0G0C7_PIG	0.221835	0.136555
Uncharacterized protein OS=Sus scrofa OX=9823 GN=VPS52 PE=1 SV=1	tr|A0A287BQH1|A0A287BQH1_PIG	4.45693	0.136952
Huntingtin-interacting protein 1-related protein OS=Sus scrofa OX=9823 GN=HIP1R PE=1 SV=3	tr|F1REX8|F1REX8_PIG	4.45693	0.136952
Uncharacterized protein OS=Sus scrofa OX=9823 GN=AFG3L2 PE=1 SV=2	tr|I3LLQ8|I3LLQ8_PIG	2.85742	0.13699
Uncharacterized protein OS=Sus scrofa OX=9823 GN=FERMT2 PE=1 SV=1	tr|A0A287BDZ6|A0A287BDZ6_PIG	#DIV/0!	0.136998
Uncharacterized protein OS=Sus scrofa OX=9823 GN=TRIM46 PE=1 SV=2	tr|F1RGR8|F1RGR8_PIG (+1)	#DIV/0!	0.136998
Uncharacterized protein OS=Sus scrofa OX=9823 GN=CD38 PE=1 SV=2	tr|F1S5D9|F1S5D9_PIG	#DIV/0!	0.136998
Single-stranded DNA-binding protein, mitochondrial OS=Sus scrofa OX=9823 GN=SSBP1 PE=1 SV=1	tr|A0A287A6V6|A0A287A6V6_PIG	0	0.137618
4-aminobutyrate aminotransferase, mitochondrial OS=Sus scrofa OX=9823 GN=ABAT PE=1 SV=2	sp|P80147|GABT_PIG	1.94027	0.138026
Protein phosphatase 1 regulatory subunit 1B OS=Sus scrofa OX=9823 GN=PPP1R1B PE=1 SV=2	tr|F1RWM4|F1RWM4_PIG	0	0.138195
Neurexin 3 OS=Sus scrofa OX=9823 GN=NRXN3 PE=1 SV=1	tr|A0A286ZYS9|A0A286ZYS9_PIG (+1)	#DIV/0!	0.138277
Tubulin beta chain OS=Sus scrofa OX=9823 GN=TUBB2B PE=1 SV=1	tr|A0A287A6Y9|A0A287A6Y9_PIG	1.23138	0.138543
Uncharacterized protein OS=Sus scrofa OX=9823 GN=PON1 PE=1 SV=1	tr|A0A287AWR7|A0A287AWR7_PIG	3.06276	0.138597
Uncharacterized protein OS=Sus scrofa OX=9823 PE=1 SV=1	tr|A0A287AY31|A0A287AY31_PIG	#DIV/0!	0.138829
Misshapen-like kinase 1 isoform 3 OS=Sus scrofa OX=9823 GN=MINK1 PE=1 SV=1	tr|A0A286ZP20|A0A286ZP20_PIG (+1)	2.11238	0.139096
UBX domain-containing protein 6 isoform 1 OS=Sus scrofa OX=9823 GN=UBXN6 PE=1 SV=2	tr|F1S7L6|F1S7L6_PIG	2.84858	0.139252
Uncharacterized protein OS=Sus scrofa OX=9823 GN=SV2B PE=1 SV=3	tr|F1SCI2|F1SCI2_PIG	3.88973	0.13975
Hydroxymethylglutaryl-CoA lyase, mitochondrial isoform 1 OS=Sus scrofa OX=9823 GN=HMGCL PE=1 SV=1	tr|A0A287ANI6|A0A287ANI6_PIG	3.84578	0.13981
Uncharacterized protein OS=Sus scrofa OX=9823 GN=CACNA2D3 PE=4 SV=1	tr|A0A287ACM6|A0A287ACM6_PIG (+3)	#DIV/0!	0.139963
Calcium/calmodulin-dependent protein kinase kinase 2 isoform 3 OS=Sus scrofa OX=9823 GN=CAMKK2 PE=4 SV=1	tr|A0A287A4U9|A0A287A4U9_PIG (+2)	#DIV/0!	0.139963
60S ribosomal protein L3 OS=Sus scrofa OX=9823 GN=RPL3 PE=1 SV=1	tr|A0A287B5V1|A0A287B5V1_PIG	#DIV/0!	0.139963
1-acylglycerol-3-phosphate O-acyltransferase 5 OS=Sus scrofa OX=9823 GN=AGPAT5 PE=1 SV=1	tr|B8XTR3|B8XTR3_PIG	#DIV/0!	0.139963
Nicalin OS=Sus scrofa OX=9823 GN=NCLN PE=1 SV=1	tr|F1S8E9|F1S8E9_PIG	#DIV/0!	0.139963
Apolipoprotein A-I OS=Sus scrofa OX=9823 GN=APOA1 PE=3 SV=2	tr|K7GM40|K7GM40_PIG	1.41875	0.140295
Uncharacterized protein OS=Sus scrofa OX=9823 GN=PPP1R2 PE=1 SV=1	tr|A0A287AX77|A0A287AX77_PIG	0	0.140319
Elongin C OS=Sus scrofa OX=9823 GN=ELOC PE=1 SV=1	tr|F2Z545|F2Z545_PIG	3.24626	0.140414
Nucleophosmin OS=Sus scrofa OX=9823 GN=NPM1 PE=1 SV=2	tr|I3LUP6|I3LUP6_PIG	0.236302	0.140536
Uncharacterized protein OS=Sus scrofa OX=9823 GN=CP PE=1 SV=4	tr|F1SKB1|F1SKB1_PIG (+1)	1.97285	0.141091
Clusterin OS=Sus scrofa OX=9823 GN=CLU PE=1 SV=1	sp|Q29549|CLUS_PIG (+1)	0.497666	0.14123
Mitochondrial fission regulator 1-like isoform X1 OS=Sus scrofa OX=9823 GN=MTFR1L PE=1 SV=2	tr|F1STT6|F1STT6_PIG	0.0396481	0.141442
Uncharacterized protein OS=Sus scrofa OX=9823 GN=NDRG1 PE=1 SV=1	tr|A0A287BKE2|A0A287BKE2_PIG (+1)	0.301914	0.141483
Amyloid-like protein 1 isoform 2 OS=Sus scrofa OX=9823 GN=APLP1 PE=4 SV=1	tr|A0A287B007|A0A287B007_PIG	0	0.141784
Uncharacterized protein OS=Sus scrofa OX=9823 GN=BIN1 PE=1 SV=1	tr|A0A286ZRI3|A0A286ZRI3_PIG (+2)	0.395349	0.141847
ATP synthase subunit f, mitochondrial OS=Sus scrofa OX=9823 GN=ATP5MF PE=3 SV=4	sp|Q95339|ATPK_PIG	1.23477	0.142061
Cell cycle exit and neuronal differentiation protein 1 OS=Sus scrofa OX=9823 GN=CEND1 PE=1 SV=1	sp|Q29026|CEND_PIG	#DIV/0!	0.142651
NADH dehydrogenase ubiquinone iron-sulfur protein 7, mitochondrial OS=Sus scrofa OX=9823 GN=NDUFS7 PE=1 SV=1	tr|A0A287B9B0|A0A287B9B0_PIG	3.22842	0.142836
Uncharacterized protein OS=Sus scrofa OX=9823 GN=EWSR1 PE=1 SV=1	tr|A0A286ZXI2|A0A286ZXI2_PIG (+3)	0	0.142859
Reticulon OS=Sus scrofa OX=9823 GN=RTN4 PE=1 SV=1	tr|A0A287B5Q4|A0A287B5Q4_PIG	0.364528	0.142977
Sulfotransferase OS=Sus scrofa OX=9823 GN=SULT4A1 PE=1 SV=3	tr|F1SJU2|F1SJU2_PIG	3.22704	0.142981
Splicing factor, proline-and glutamine-rich isoform X1 OS=Sus scrofa OX=9823 GN=SFPQ PE=4 SV=1	tr|A0A287A4F2|A0A287A4F2_PIG	0.636634	0.14332
Ubiquitin carboxyl-terminal hydrolase 14 isoform a OS=Sus scrofa OX=9823 GN=USP14 PE=1 SV=2	tr|I3LIN5|I3LIN5_PIG	1.89688	0.143928
Uncharacterized protein OS=Sus scrofa OX=9823 GN=CALD1 PE=1 SV=2	tr|I3L650|I3L650_PIG	0	0.144859
Gamma-soluble NSF attachment protein OS=Sus scrofa OX=9823 GN=NAPG PE=1 SV=1	tr|A0A287AYY9|A0A287AYY9_PIG	0.288698	0.145033
Vitronectin OS=Sus scrofa OX=9823 GN=VTN PE=1 SV=2	tr|I3L638|I3L638_PIG	1.74634	0.145172
Core histone macro-H2A OS=Sus scrofa OX=9823 GN=H2AFY PE=1 SV=1	tr|A0A287ALI7|A0A287ALI7_PIG (+1)	2.47337	0.145813
Uncharacterized protein OS=Sus scrofa OX=9823 GN=CUTA PE=1 SV=1	tr|A0A287ADB5|A0A287ADB5_PIG (+2)	0.0928585	0.146392
Uncharacterized protein OS=Sus scrofa OX=9823 GN=NDUFA5 PE=1 SV=1	tr|A0A287BAW0|A0A287BAW0_PIG	0.601624	0.146709
Uncharacterized protein OS=Sus scrofa OX=9823 GN=ARPIN PE=1 SV=1	tr|A0A287B5T1|A0A287B5T1_PIG (+1)	0	0.147476
Uncharacterized protein OS=Sus scrofa OX=9823 GN=ADIRF PE=1 SV=1	tr|A0A287ACN2|A0A287ACN2_PIG	0	0.147476
Uncharacterized protein OS=Sus scrofa OX=9823 GN=CRTC1 PE=4 SV=3	tr|F1S903|F1S903_PIG	0	0.147476
Peptidyl-prolyl cis-trans isomerase A OS=Sus scrofa OX=9823 GN=PPIA PE=1 SV=2	sp|P62936|PPIA_PIG	0.474816	0.147642
Glutamate receptor ionotropic, NMDA 1 isoform GluN1-1a OS=Sus scrofa OX=9823 GN=GRIN1 PE=3 SV=1	tr|A0A286ZIR4|A0A286ZIR4_PIG (+1)	#DIV/0!	0.147954
Uncharacterized protein OS=Sus scrofa OX=9823 GN=RAB12 PE=4 SV=1	tr|A0A286ZMQ7|A0A286ZMQ7_PIG	#DIV/0!	0.147954
Myotubularin-related protein 9 OS=Sus scrofa OX=9823 GN=MTMR9 PE=4 SV=1	tr|A0A286ZQP7|A0A286ZQP7_PIG	#DIV/0!	0.147954
Uncharacterized protein OS=Sus scrofa OX=9823 GN=S1PR1 PE=1 SV=1	tr|I3LIS0|I3LIS0_PIG	#DIV/0!	0.147954
Glutamine--tRNA ligase OS=Sus scrofa OX=9823 GN=QARS PE=2 SV=1	tr|M3TYW5|M3TYW5_PIG	#DIV/0!	0.147954
Phosphodiesterase OS=Sus scrofa OX=9823 GN=PDE1A PE=3 SV=1	tr|A0A287AEH8|A0A287AEH8_PIG	2.37429	0.14846
Alpha-1,4 glucan phosphorylase OS=Sus scrofa OX=9823 GN=PYGL PE=1 SV=3	tr|F1SFF8|F1SFF8_PIG	1.94343	0.149822
60S ribosomal protein L18 OS=Sus scrofa OX=9823 GN=RPL18 PE=1 SV=4	sp|Q95342|RL18_PIG	2.86296	0.14989
Alpha-tubulin N-acetyltransferase 1 OS=Sus scrofa OX=9823 GN=ATAT1 PE=3 SV=1	sp|Q767K7|ATAT_PIG	0	0.150571
Protein arginine N-methyltransferase 1 isoform 3 OS=Sus scrofa OX=9823 GN=PRMT1 PE=1 SV=1	tr|A0A286ZN59|A0A286ZN59_PIG (+3)	#DIV/0!	0.151398
Uncharacterized protein OS=Sus scrofa OX=9823 GN=AIMP2 PE=1 SV=1	tr|A0A286ZVS9|A0A286ZVS9_PIG (+1)	#DIV/0!	0.151398
FSD1-like protein isoform 6 OS=Sus scrofa OX=9823 GN=FSD1L PE=1 SV=1	tr|A0A287AFN3|A0A287AFN3_PIG (+2)	#DIV/0!	0.151398
ATP-binding cassette sub-family D member 3 OS=Sus scrofa OX=9823 GN=ABCD3 PE=1 SV=1	tr|A0A287ANH9|A0A287ANH9_PIG (+2)	#DIV/0!	0.151398
Double C2-like domain-containing protein OS=Sus scrofa OX=9823 GN=DOC2A PE=4 SV=1	tr|A0A287ASK3|A0A287ASK3_PIG	#DIV/0!	0.151398
Uncharacterized protein OS=Sus scrofa OX=9823 GN=RAB3GAP2 PE=1 SV=1	tr|A0A287B4A4|A0A287B4A4_PIG (+1)	#DIV/0!	0.151398
Wolframin ER transmembrane glycoprotein OS=Sus scrofa OX=9823 GN=WFS1 PE=4 SV=1	tr|A0A287BFZ3|A0A287BFZ3_PIG	#DIV/0!	0.151398
Uncharacterized protein OS=Sus scrofa OX=9823 GN=ARHGEF11 PE=4 SV=3	tr|F1RHK9|F1RHK9_PIG	#DIV/0!	0.151398
Exocyst complex component 4 tv1 OS=Sus scrofa OX=9823 GN=EXOC4 PE=1 SV=3	tr|F1SNG6|F1SNG6_PIG	#DIV/0!	0.151398
Uncharacterized protein OS=Sus scrofa OX=9823 GN=LOC100625088 PE=1 SV=2	tr|I3LGJ5|I3LGJ5_PIG	0	0.152017
Tubulin alpha-1B chain OS=Sus scrofa OX=9823 GN=TUBA1B PE=1 SV=1	sp|Q2XVP4|TBA1B_PIG	1.53775	0.152021
Trifunctional enzyme subunit beta, mitochondrial isoform X1 OS=Sus scrofa OX=9823 GN=HADHB PE=1 SV=2	tr|F1SDN2|F1SDN2_PIG	1.63051	0.1521
Leucine-rich PPR motif-containing protein, mitochondrial OS=Sus scrofa OX=9823 GN=LRPPRC PE=1 SV=2	tr|F1S5J1|F1S5J1_PIG	2.58384	0.152297
Uncharacterized protein OS=Sus scrofa OX=9823 GN=GNAO1 PE=1 SV=1	tr|A0A287B6X9|A0A287B6X9_PIG	1.5496	0.152298
Transgelin OS=Sus scrofa OX=9823 GN=TAGLN2 PE=1 SV=2	tr|F1RJ93|F1RJ93_PIG	0.310772	0.153897
Uncharacterized protein OS=Sus scrofa OX=9823 GN=SEMA7A PE=1 SV=2	tr|I3LQF4|I3LQF4_PIG	2.84176	0.15428
Phospholipid hydroperoxide glutathione peroxidase OS=Sus scrofa OX=9823 GN=GPX4 PE=1 SV=3	sp|P36968|GPX4_PIG	2.97422	0.154697
Heme-binding protein 1 OS=Sus scrofa OX=9823 GN=HEBP1 PE=2 SV=1	sp|Q5ISC6|HEBP1_PIG (+1)	0.413065	0.154827
Superoxide dismutase [Cu-Zn] OS=Sus scrofa OX=9823 GN=SOD1 PE=1 SV=2	sp|P04178|SODC_PIG	0.342113	0.155003
Uncharacterized protein OS=Sus scrofa OX=9823 GN=ASRGL1 PE=1 SV=3	tr|F1RPW8|F1RPW8_PIG	0.324771	0.155181
Uncharacterized protein OS=Sus scrofa OX=9823 GN=EPRS PE=1 SV=1	tr|A0A286ZQW0|A0A286ZQW0_PIG (+1)	3.48263	0.155233
Synaptic vesicle glycoprotein 2A isoform 1 OS=Sus scrofa OX=9823 GN=SV2A PE=1 SV=1	tr|F1SDF9|F1SDF9_PIG	2.30659	0.155718
Protein S100 OS=Sus scrofa OX=9823 GN=S100A8 PE=1 SV=1	tr|C3S7K5|C3S7K5_PIG	2.75153	0.156283
Ras-related protein Rab-3C isoform 1 OS=Sus scrofa OX=9823 GN=RAB3C PE=1 SV=1	tr|A0A287B923|A0A287B923_PIG	2.8162	0.156323
Branched-chain-amino-acid aminotransferase OS=Sus scrofa OX=9823 GN=BCAT1 PE=1 SV=1	tr|A0A287AGX5|A0A287AGX5_PIG (+4)	2.94006	0.156328
Ras-related protein Ral-B OS=Sus scrofa OX=9823 GN=RALB PE=1 SV=2	tr|I3LV17|I3LV17_PIG	2.04521	0.156885
Uncharacterized protein OS=Sus scrofa OX=9823 GN=CSRP1 PE=1 SV=1	tr|I3LL97|I3LL97_PIG	0.497917	0.156919
Macrophage migration inhibitory factor OS=Sus scrofa OX=9823 GN=MIF PE=1 SV=3	sp|P80928|MIF_PIG	0.485023	0.157043
Zyxin OS=Sus scrofa OX=9823 GN=ZYX PE=1 SV=2	tr|F1SRU2|F1SRU2_PIG (+1)	0	0.158257
Rab11 family-interacting protein 5 OS=Sus scrofa OX=9823 GN=RAB11FIP5 PE=1 SV=2	tr|I3LFK8|I3LFK8_PIG	0	0.158257
Uncharacterized protein OS=Sus scrofa OX=9823 GN=CSTF2 PE=1 SV=1	tr|I3LE23|I3LE23_PIG	0	0.158257
Uncharacterized protein OS=Sus scrofa OX=9823 GN=CBARP PE=4 SV=3	tr|F1S6Q8|F1S6Q8_PIG	0	0.158257
Guanine nucleotide-binding protein subunit gamma OS=Sus scrofa OX=9823 GN=GNG7 PE=1 SV=1	tr|A0A287AHC5|A0A287AHC5_PIG	0	0.158348
Leucine-rich repeat-containing protein 59 OS=Sus scrofa OX=9823 GN=LRRC59 PE=1 SV=2	tr|I3L995|I3L995_PIG (+1)	0	0.158348
SAP domain-containing ribonucleoprotein OS=Sus scrofa OX=9823 GN=SARNP PE=1 SV=2	tr|F1SPJ5|F1SPJ5_PIG	0	0.158348
TSC22 domain family protein 1 isoform X1 OS=Sus scrofa OX=9823 GN=TSC22D1 PE=1 SV=1	tr|A0A286ZJA6|A0A286ZJA6_PIG	0	0.158348
2',3'-cyclic-nucleotide 3'-phosphodiesterase OS=Sus scrofa OX=9823 GN=CNP PE=1 SV=1	tr|A0A287BD93|A0A287BD93_PIG	1.7648	0.159429
Uncharacterized protein OS=Sus scrofa OX=9823 GN=PPP1R9B PE=1 SV=2	tr|F1RT57|F1RT57_PIG	0.113165	0.159502
Synaptic vesicle membrane protein VAT-1 homolog OS=Sus scrofa OX=9823 GN=VAT1 PE=1 SV=1	tr|I3L9V2|I3L9V2_PIG	1.69779	0.160852
Uncharacterized protein OS=Sus scrofa OX=9823 GN=UBQLN2 PE=4 SV=1	tr|A0A286ZWA5|A0A286ZWA5_PIG	0.0878634	0.161254
Uncharacterized protein OS=Sus scrofa OX=9823 GN=PTPRS PE=1 SV=2	tr|I3LGE9|I3LGE9_PIG (+1)	2.10088	0.161557
Myristoylated alanine-rich C-kinase substrate OS=Sus scrofa OX=9823 GN=MARCKS PE=1 SV=1	tr|A0A287BRL8|A0A287BRL8_PIG	0.352767	0.161608
Uncharacterized protein OS=Sus scrofa OX=9823 GN=PLS3 PE=1 SV=3	tr|F1RWT2|F1RWT2_PIG (+1)	2.10363	0.162
Uncharacterized protein OS=Sus scrofa OX=9823 GN=RASGRF2 PE=4 SV=1	tr|A0A286ZWL8|A0A286ZWL8_PIG (+1)	#DIV/0!	0.162044
Carboxypeptidase B2 isoform 1 preproprotein OS=Sus scrofa OX=9823 GN=CPB2 PE=1 SV=3	tr|F1RK01|F1RK01_PIG	#DIV/0!	0.162044
Uncharacterized protein OS=Sus scrofa OX=9823 GN=VAMP2 PE=1 SV=1	tr|A0A287A9H6|A0A287A9H6_PIG	2.55434	0.1633
Alpha-internexin OS=Sus scrofa OX=9823 GN=INA PE=1 SV=1	tr|F1S847|F1S847_PIG	1.6161	0.164301
Sortilin OS=Sus scrofa OX=9823 GN=SORT1 PE=1 SV=1	tr|A0A287A1U0|A0A287A1U0_PIG (+1)	#DIV/0!	0.165542
Uncharacterized protein OS=Sus scrofa OX=9823 GN=FUS PE=1 SV=1	tr|A0A287BPC6|A0A287BPC6_PIG (+2)	0.124796	0.165586
Uncharacterized protein OS=Sus scrofa OX=9823 GN=CLASP2 PE=1 SV=1	tr|A0A286ZIY7|A0A286ZIY7_PIG	1.78351	0.166594
Integrin beta OS=Sus scrofa OX=9823 GN=ITGB2 PE=1 SV=1	tr|A0A287AGU1|A0A287AGU1_PIG	0	0.167085
Enoyl-CoA hydratase, mitochondrial OS=Sus scrofa OX=9823 GN=ECHS1 PE=1 SV=1	tr|A0A287AA21|A0A287AA21_PIG	1.44852	0.167588
V-type proton ATPase subunit H OS=Sus scrofa OX=9823 GN=ATP6V1H PE=3 SV=3	tr|F1RSG6|F1RSG6_PIG	1.72658	0.167726
Thioredoxin reductase 1, cytoplasmic OS=Sus scrofa OX=9823 GN=TXNRD1 PE=1 SV=3	tr|F1SG38|F1SG38_PIG	4.00004	0.168135
GTP-binding nuclear protein Ran OS=Sus scrofa OX=9823 GN=RAN PE=1 SV=2	tr|F1RFQ7|F1RFQ7_PIG	1.33105	0.169354
Uncharacterized protein OS=Sus scrofa OX=9823 GN=CEP170 PE=1 SV=1	tr|A0A287AIA1|A0A287AIA1_PIG (+1)	0.421017	0.169834
Microtubule-associated protein OS=Sus scrofa OX=9823 GN=MAPT PE=1 SV=1	tr|A0A287AAQ4|A0A287AAQ4_PIG	0.277338	0.171188
Heat shock 70 kDa protein 1B OS=Sus scrofa OX=9823 GN=HSPA1B PE=2 SV=1	sp|Q6S4N2|HS71B_PIG	1.88533	0.171226
Uncharacterized protein OS=Sus scrofa OX=9823 GN=NANS PE=1 SV=1	tr|A0A287A8X8|A0A287A8X8_PIG (+1)	0	0.171299
cAMP-dependent protein kinase inhibitor OS=Sus scrofa OX=9823 GN=PKIA PE=1 SV=1	tr|F2Z547|F2Z547_PIG	0	0.171299
Neuronal calcium sensor 1 OS=Sus scrofa OX=9823 GN=NCS1 PE=1 SV=1	tr|A0A287A120|A0A287A120_PIG	#DIV/0!	0.171859
Uncharacterized protein OS=Sus scrofa OX=9823 GN=INPP4A PE=1 SV=3	tr|F1STD8|F1STD8_PIG	2.0725	0.172367
Uncharacterized protein OS=Sus scrofa OX=9823 GN=SPARCL1 PE=1 SV=1	tr|A0A286ZRX5|A0A286ZRX5_PIG	0.0813906	0.173487
Uncharacterized protein OS=Sus scrofa OX=9823 GN=YWHAE PE=1 SV=1	tr|A0A287A2R9|A0A287A2R9_PIG	1.68423	0.173515
Uncharacterized protein OS=Sus scrofa OX=9823 GN=PEA15 PE=1 SV=1	tr|A0A287AC69|A0A287AC69_PIG	0.508483	0.173578
Uncharacterized protein OS=Sus scrofa OX=9823 GN=RAB10 PE=1 SV=1	tr|F2Z5F2|F2Z5F2_PIG	1.85885	0.174086
Phenylalanine--tRNA ligase alpha subunit OS=Sus scrofa OX=9823 GN=FARSA PE=1 SV=3	tr|F1SD97|F1SD97_PIG (+1)	1.87795	0.174189
Uncharacterized protein OS=Sus scrofa OX=9823 GN=AVEN PE=4 SV=1	tr|A0A287AHU0|A0A287AHU0_PIG	0	0.175474
Uncharacterized protein OS=Sus scrofa OX=9823 GN=DLGAP4 PE=1 SV=3	tr|F1S482|F1S482_PIG	0	0.175573
Serine/threonine-protein phosphatase OS=Sus scrofa OX=9823 GN=PPP6C PE=1 SV=1	tr|F2Z5N6|F2Z5N6_PIG	#DIV/0!	0.175836
Glutamate receptor 1 isoform 2 OS=Sus scrofa OX=9823 GN=GRIA1 PE=3 SV=1	tr|A0A286ZS63|A0A286ZS63_PIG	#DIV/0!	0.175836
NADH dehydrogenase [ubiquinone] iron-sulfur protein 6, mitochondrial OS=Sus scrofa OX=9823 GN=NDUFS6 PE=1 SV=1	tr|F1S031|F1S031_PIG	0.129751	0.17622
Uncharacterized protein OS=Sus scrofa OX=9823 GN=HNRNPH3 PE=1 SV=3	tr|F2Z5W4|F2Z5W4_PIG	0.479811	0.176766
Ragulator complex protein LAMTOR1 OS=Sus scrofa OX=9823 GN=LAMTOR1 PE=1 SV=1	tr|F2Z5W6|F2Z5W6_PIG	0.393784	0.177208
Rab GDP dissociation inhibitor OS=Sus scrofa OX=9823 GN=GDI1 PE=1 SV=2	tr|I3L893|I3L893_PIG	1.44293	0.177397
Uncharacterized protein OS=Sus scrofa OX=9823 GN=EPN1 PE=4 SV=1	tr|A0A286ZUG0|A0A286ZUG0_PIG (+1)	0.328359	0.177423
Ubiquitin carboxyl-terminal hydrolase isozyme L1 OS=Sus scrofa OX=9823 GN=UCHL1 PE=2 SV=1	sp|Q6SEG5|UCHL1_PIG	0.56713	0.177828
N(G),N(G)-dimethylarginine dimethylaminohydrolase 2 isoform X1 OS=Sus scrofa OX=9823 GN=DDAH2 PE=4 SV=1	tr|A0A287A5S7|A0A287A5S7_PIG	0	0.178841
ADP-ribose pyrophosphatase, mitochondrial isoform a OS=Sus scrofa OX=9823 GN=NUDT9 PE=1 SV=1	tr|A0A287AFA9|A0A287AFA9_PIG (+1)	0.128857	0.179547
Uncharacterized protein OS=Sus scrofa OX=9823 GN=SYNCRIP PE=1 SV=1	tr|A0A287AQG4|A0A287AQG4_PIG (+1)	1.94388	0.179979
Uncharacterized protein OS=Sus scrofa OX=9823 GN=SYNRG PE=4 SV=1	tr|A0A286ZRQ8|A0A286ZRQ8_PIG	0	0.180121
Aldehyde dehydrogenase, mitochondrial OS=Sus scrofa OX=9823 GN=ALDH2 PE=2 SV=1	sp|Q2XQV4|ALDH2_PIG	1.84983	0.180445
Uncharacterized protein OS=Sus scrofa OX=9823 GN=ADD1 PE=1 SV=1	tr|A0A287AI37|A0A287AI37_PIG	1.38555	0.180519
Uncharacterized protein OS=Sus scrofa OX=9823 GN=GABBR2 PE=3 SV=2	tr|I3L6R6|I3L6R6_PIG	2.66167	0.180662
60S acidic ribosomal protein P0 OS=Sus scrofa OX=9823 GN=RPLP0 PE=1 SV=2	sp|Q29214|RLA0_PIG	2.67905	0.18103
Uncharacterized protein OS=Sus scrofa OX=9823 GN=AKAP12 PE=1 SV=1	tr|A0A287BE06|A0A287BE06_PIG	0.265097	0.181624
Uncharacterized protein OS=Sus scrofa OX=9823 GN=PSMD13 PE=1 SV=1	tr|F1RGC9|F1RGC9_PIG	2.67831	0.181848
Voltage-dependent calcium channel alpha-2 delta subunit OS=Sus scrofa OX=9823 GN=CACNA2D1 PE=1 SV=1	tr|O77773|O77773_PIG	1.5629	0.182352
PDZ and LIM domain protein 5 isoform X8 OS=Sus scrofa OX=9823 GN=PDLIM5 PE=1 SV=1	tr|A0A287A1G4|A0A287A1G4_PIG (+1)	0	0.182399
Tubulin alpha chain OS=Sus scrofa OX=9823 GN=TUBA1A PE=3 SV=1	tr|A0A287ADK8|A0A287ADK8_PIG	1.46958	0.182474
Heterogeneous nuclear ribonucleoprotein R isoform X2 OS=Sus scrofa OX=9823 GN=HNRNPR PE=1 SV=1	tr|M3V815|M3V815_PIG	1.85935	0.182827
Creatine kinase B-type OS=Sus scrofa OX=9823 GN=CKB PE=3 SV=2	tr|I3LPB5|I3LPB5_PIG	1.44344	0.183514
Uncharacterized protein OS=Sus scrofa OX=9823 GN=JCAD PE=1 SV=3	tr|F1RWE1|F1RWE1_PIG	0	0.183516
Osteoclast-stimulating factor 1 OS=Sus scrofa OX=9823 GN=OSTF1 PE=1 SV=1	tr|A0A2C9F365|A0A2C9F365_PIG	0	0.183516
Uncharacterized protein OS=Sus scrofa OX=9823 GN=BCAS1 PE=1 SV=1	tr|A0A287AEP1|A0A287AEP1_PIG (+2)	0.133256	0.184631
Uncharacterized protein OS=Sus scrofa OX=9823 GN=YWHAH PE=1 SV=1	tr|F2Z4Y1|F2Z4Y1_PIG	1.5721	0.184966
LIM and SH3 domain protein 1 OS=Sus scrofa OX=9823 GN=LASP1 PE=2 SV=1	tr|M3VJZ7|M3VJZ7_PIG	0.282541	0.185362
Uncharacterized protein OS=Sus scrofa OX=9823 GN=ENO2 PE=1 SV=2	tr|I3LCN1|I3LCN1_PIG	1.50876	0.186013
Dihydropyrimidinase-related protein 5 isoform X1 OS=Sus scrofa OX=9823 GN=DPYSL5 PE=1 SV=3	tr|F1SDQ2|F1SDQ2_PIG	0.720446	0.186027
Uncharacterized protein OS=Sus scrofa OX=9823 GN=CLIP2 PE=1 SV=1	tr|A0A287A3Q8|A0A287A3Q8_PIG (+1)	0.335018	0.186077
Dynein light chain OS=Sus scrofa OX=9823 GN=DYNLL2 PE=1 SV=1	tr|F2Z536|F2Z536_PIG	1.73286	0.186163
Uncharacterized protein OS=Sus scrofa OX=9823 GN=NPTX1 PE=1 SV=3	tr|F1RZA8|F1RZA8_PIG	2.66232	0.186648
NADH dehydrogenase ubiquinone iron-sulfur protein 3, mitochondrial OS=Sus scrofa OX=9823 GN=NDUFS3 PE=1 SV=1	tr|A0A286ZNN4|A0A286ZNN4_PIG	1.71942	0.186813
Uncharacterized protein OS=Sus scrofa OX=9823 GN=ADD1 PE=1 SV=1	tr|A0A286ZR45|A0A286ZR45_PIG (+1)	1.34232	0.187491
Alpha-synuclein OS=Sus scrofa OX=9823 GN=SNCA PE=2 SV=1	sp|Q3I5G7|SYUA_PIG	0.344427	0.187915
Glucose-6-phosphate isomerase OS=Sus scrofa OX=9823 GN=GPI PE=1 SV=3	sp|P08059|G6PI_PIG	1.52525	0.188341
Metaxin-2 OS=Sus scrofa OX=9823 GN=MTX2 PE=2 SV=1	sp|Q2L969|MTX2_PIG	2.62505	0.188525
Uncharacterized protein OS=Sus scrofa OX=9823 GN=CANX PE=1 SV=1	tr|A0A287AXF5|A0A287AXF5_PIG (+1)	1.56555	0.18892
Mitochondrial glutamate carrier 1 isoform X1 OS=Sus scrofa OX=9823 GN=SLC25A22 PE=1 SV=1	tr|F1RYY8|F1RYY8_PIG	1.44213	0.189107
Brain-type fatty acid-binding protein OS=Sus scrofa OX=9823 GN=fabp7 PE=1 SV=1	tr|A4D7T6|A4D7T6_PIG	0.619897	0.190218
Uncharacterized protein OS=Sus scrofa OX=9823 GN=CPLX2 PE=4 SV=1	tr|A0A286ZPT9|A0A286ZPT9_PIG	0.26023	0.190282
ADP-ribosylation factor-like protein 3 OS=Sus scrofa OX=9823 GN=ARL3 PE=2 SV=1	sp|Q52NJ4|ARL3_PIG (+1)	2.69803	0.190317
Microtubule-associated protein OS=Sus scrofa OX=9823 GN=MAPT PE=1 SV=1	tr|A0A286ZZV5|A0A286ZZV5_PIG	0.259375	0.191137
SPARC OS=Sus scrofa OX=9823 GN=SPARC PE=1 SV=2	sp|P20112|SPRC_PIG	0	0.191231
MTSS1-like protein OS=Sus scrofa OX=9823 GN=MTSS1L PE=1 SV=1	tr|A0A287BCH7|A0A287BCH7_PIG	0	0.191231
Uncharacterized protein OS=Sus scrofa OX=9823 GN=GPRIN1 PE=1 SV=3	tr|F1S3A2|F1S3A2_PIG	0.0755949	0.192129
Terpene cyclase/mutase family member OS=Sus scrofa OX=9823 GN=LSS PE=1 SV=1	tr|A0A286ZU34|A0A286ZU34_PIG (+1)	2.57583	0.192304
Programmed cell death protein 5 OS=Sus scrofa OX=9823 GN=PDCD5 PE=1 SV=1	tr|F1RNX2|F1RNX2_PIG	0.160999	0.192669
Uncharacterized protein OS=Sus scrofa OX=9823 GN=ITPR1 PE=1 SV=1	tr|A0A286ZUQ1|A0A286ZUQ1_PIG (+2)	#DIV/0!	0.19318
Coatomer subunit gamma OS=Sus scrofa OX=9823 GN=COPG2 PE=1 SV=1	tr|A0A287A5X5|A0A287A5X5_PIG	#DIV/0!	0.19318
F-box/LRR-repeat protein 16 OS=Sus scrofa OX=9823 GN=FBXL16 PE=4 SV=2	tr|F1RG39|F1RG39_PIG	#DIV/0!	0.19318
Transcriptional activator protein Pur-beta OS=Sus scrofa OX=9823 GN=PURB PE=1 SV=1	tr|A0A287A4H2|A0A287A4H2_PIG	0.722099	0.193885
Heterogeneous nuclear ribonucleoprotein H isoform X4 OS=Sus scrofa OX=9823 GN=HNRNPH1 PE=1 SV=1	tr|A0A286ZQN9|A0A286ZQN9_PIG (+1)	0.731209	0.194703
T-complex protein 1 subunit eta OS=Sus scrofa OX=9823 GN=CCT7 PE=1 SV=1	tr|D0G0C9|D0G0C9_PIG	1.72522	0.195738
Uncharacterized protein OS=Sus scrofa OX=9823 GN=EPN2 PE=4 SV=1	tr|A0A287B8Y9|A0A287B8Y9_PIG	0.251875	0.196871
Uncharacterized protein OS=Sus scrofa OX=9823 GN=TMEM177 PE=4 SV=1	tr|F1RXW5|F1RXW5_PIG	#DIV/0!	0.197276
Jupiter microtubule associated homolog 1 isoform 1 OS=Sus scrofa OX=9823 GN=JPT1 PE=1 SV=1	tr|F1RVX2|F1RVX2_PIG	0.0966528	0.197612
Uncharacterized protein OS=Sus scrofa OX=9823 GN=TRAP1 PE=1 SV=1	tr|A0A286ZLB1|A0A286ZLB1_PIG (+1)	2.9416	0.197612
Uncharacterized protein OS=Sus scrofa OX=9823 GN=COL1A2 PE=1 SV=2	tr|I3L781|I3L781_PIG	0	0.198083
Uncharacterized protein OS=Sus scrofa OX=9823 GN=COPS7A PE=1 SV=1	tr|F2Z5Q3|F2Z5Q3_PIG	2.11567	0.198466
Uncharacterized protein OS=Sus scrofa OX=9823 GN=HK3 PE=1 SV=3	tr|F1S3B7|F1S3B7_PIG (+1)	7.44492	0.198529
Mitogen-activated protein kinase OS=Sus scrofa OX=9823 GN=MAPK3 PE=1 SV=1	tr|A0A287BLM6|A0A287BLM6_PIG	2.13497	0.199637
Uncharacterized protein OS=Sus scrofa OX=9823 GN=OAT PE=1 SV=1	tr|A0A287BBB4|A0A287BBB4_PIG (+1)	2.15604	0.200193
Uncharacterized protein OS=Sus scrofa OX=9823 GN=PSIP1 PE=1 SV=2	tr|F1SMR3|F1SMR3_PIG	0.181919	0.200639
X-prolyl aminopeptidase (Aminopeptidase P) 1, soluble OS=Sus scrofa OX=9823 GN=XPNPEP1 PE=1 SV=1	tr|K9IVF7|K9IVF7_PIG	1.87291	0.201094
Uncharacterized protein OS=Sus scrofa OX=9823 GN=TARDBP PE=1 SV=1	tr|A0A287B160|A0A287B160_PIG (+1)	2.67587	0.201256
NudC domain-containing protein 3 OS=Sus scrofa OX=9823 GN=NUDCD3 PE=1 SV=2	tr|F1SSH4|F1SSH4_PIG	2.70201	0.202544
UV excision repair protein RAD23 homolog B isoform 1 OS=Sus scrofa OX=9823 GN=RAD23B PE=1 SV=1	tr|F1SP32|F1SP32_PIG	0.182788	0.202678
Uncharacterized protein OS=Sus scrofa OX=9823 GN=TPD52 PE=1 SV=3	tr|F1RX99|F1RX99_PIG	0.148494	0.202688
Aminopeptidase OS=Sus scrofa OX=9823 GN=NPEPPS PE=1 SV=2	tr|F1RWJ6|F1RWJ6_PIG	1.6792	0.202754
Sodium/potassium-transporting ATPase subunit beta OS=Sus scrofa OX=9823 GN=ATP1B2 PE=1 SV=2	tr|F1ST41|F1ST41_PIG	1.70703	0.202885
Uncharacterized protein OS=Sus scrofa OX=9823 GN=PA2G4 PE=1 SV=2	tr|I3LVF5|I3LVF5_PIG	1.86101	0.202931
Uncharacterized protein OS=Sus scrofa OX=9823 GN=L1CAM PE=1 SV=2	tr|K7GN08|K7GN08_PIG	0.455666	0.203442
Myelin basic protein OS=Sus scrofa OX=9823 GN=MBP PE=1 SV=1	tr|A0A286ZKY6|A0A286ZKY6_PIG	0.512032	0.203823
Talin-1 OS=Sus scrofa OX=9823 GN=TLN1 PE=1 SV=3	tr|F1SFZ8|F1SFZ8_PIG	0.160639	0.203923
Uncharacterized protein OS=Sus scrofa OX=9823 GN=PSMD4 PE=1 SV=1	tr|A0A288CG47|A0A288CG47_PIG	0.217634	0.204264
Uncharacterized protein OS=Sus scrofa OX=9823 GN=MAP6 PE=1 SV=1	tr|A0A287AMH1|A0A287AMH1_PIG	0.262774	0.204744
Uncharacterized protein OS=Sus scrofa OX=9823 GN=UBAP2L PE=1 SV=1	tr|A0A286ZKU8|A0A286ZKU8_PIG (+3)	0.103949	0.20483
Glycine cleavage system H protein OS=Sus scrofa OX=9823 GN=GCSH PE=3 SV=1	tr|A0A287BA24|A0A287BA24_PIG (+1)	0.208613	0.20486
Uncharacterized protein OS=Sus scrofa OX=9823 GN=TIMM13 PE=1 SV=1	tr|I3LS73|I3LS73_PIG	0	0.205056
Uncharacterized protein OS=Sus scrofa OX=9823 GN=PRRC2A PE=4 SV=2	tr|F1RTF0|F1RTF0_PIG	0	0.205056
Uncharacterized protein OS=Sus scrofa OX=9823 GN=NYAP2 PE=4 SV=3	tr|F1SNP6|F1SNP6_PIG	0	0.205056
Uncharacterized protein OS=Sus scrofa OX=9823 GN=TPD52L1 PE=1 SV=1	tr|A0A286ZTW5|A0A286ZTW5_PIG	0	0.205157
Uncharacterized protein OS=Sus scrofa OX=9823 GN=DBNL PE=1 SV=2	tr|F1ST81|F1ST81_PIG	0.348571	0.20523
Uncharacterized protein OS=Sus scrofa OX=9823 GN=CSDE1 PE=1 SV=1	tr|A0A287BM79|A0A287BM79_PIG	1.5745	0.205452
Uncharacterized protein OS=Sus scrofa OX=9823 GN=HSPA4 PE=1 SV=1	tr|A0A287B6J6|A0A287B6J6_PIG	1.71653	0.205781
1-phosphatidylinositol 4,5-bisphosphate phosphodiesterase OS=Sus scrofa OX=9823 GN=PLCB1 PE=1 SV=1	tr|A0A287B1S0|A0A287B1S0_PIG (+1)	1.80081	0.206329
Uncharacterized protein OS=Sus scrofa OX=9823 GN=CALU PE=1 SV=3	tr|F1SMN1|F1SMN1_PIG	0.162831	0.207172
Uncharacterized protein OS=Sus scrofa OX=9823 GN=THY1 PE=1 SV=1	tr|A0A287ANZ8|A0A287ANZ8_PIG (+1)	1.5398	0.208576
Non-POU domain containing octamer binding OS=Sus scrofa OX=9823 GN=NONO PE=1 SV=2	tr|I3LSU1|I3LSU1_PIG	2.76641	0.208948
CD166 antigen OS=Sus scrofa OX=9823 GN=ALCAM PE=1 SV=2	tr|K7GLE8|K7GLE8_PIG	2.05581	0.209302
Uncharacterized protein OS=Sus scrofa OX=9823 GN=PLD3 PE=1 SV=2	tr|I3L5D6|I3L5D6_PIG	1.62593	0.210366
Non-specific serine/threonine protein kinase OS=Sus scrofa OX=9823 GN=PAK2 PE=1 SV=3	tr|F1SQW0|F1SQW0_PIG	0	0.211496
Secretory carrier-associated membrane protein 1 OS=Sus scrofa OX=9823 GN=SCAMP1 PE=2 SV=1	sp|O77735|SCAM1_PIG	2.78867	0.212007
Ras-related protein Rap-1b isoform 1 OS=Sus scrofa OX=9823 GN=RAP1B PE=1 SV=1	tr|A0A287APX6|A0A287APX6_PIG	1.52855	0.212021
Secretogranin-2 OS=Sus scrofa OX=9823 GN=SCG2 PE=2 SV=1	sp|Q5FZP5|SCG2_PIG	0	0.214418
Cdc42 effector protein 2 OS=Sus scrofa OX=9823 GN=CDC42EP2 PE=3 SV=1	tr|F1RQV5|F1RQV5_PIG	0	0.214418
Uncharacterized protein OS=Sus scrofa OX=9823 GN=SNAP91 PE=1 SV=1	tr|A0A286ZI77|A0A286ZI77_PIG (+7)	1.38796	0.216325
D-3-phosphoglycerate dehydrogenase OS=Sus scrofa OX=9823 GN=PHGDH PE=3 SV=1	sp|A5GFY8|SERA_PIG	1.39724	0.216345
Uncharacterized protein OS=Sus scrofa OX=9823 GN=ZFYVE19 PE=1 SV=3	tr|F1SST2|F1SST2_PIG	0	0.217347
Uncharacterized protein OS=Sus scrofa OX=9823 GN=SHROOM2 PE=1 SV=3	tr|F1SG21|F1SG21_PIG (+1)	0	0.217446
Serine/threonine-protein phosphatase OS=Sus scrofa OX=9823 GN=PPP3CB PE=1 SV=2	tr|K7GMY6|K7GMY6_PIG	2.51236	0.218691
Uncharacterized protein OS=Sus scrofa OX=9823 GN=CTNNB1 PE=1 SV=1	tr|A0A287ACQ4|A0A287ACQ4_PIG (+1)	1.38011	0.219381
HECW2 OS=Sus scrofa OX=9823 GN=HECW2 PE=2 SV=1	tr|E3US74|E3US74_PIG	2.45509	0.220318
Uncharacterized protein OS=Sus scrofa OX=9823 GN=EIF4E PE=1 SV=1	tr|F1S0B9|F1S0B9_PIG	2.45404	0.220591
Uncharacterized protein OS=Sus scrofa OX=9823 GN=NDUFB11 PE=1 SV=1	tr|A0A287BMW6|A0A287BMW6_PIG	2.45404	0.220591
V-type proton ATPase subunit OS=Sus scrofa OX=9823 GN=ATP6V0D1 PE=1 SV=1	tr|F2Z5H6|F2Z5H6_PIG	2.24372	0.221722
Uncharacterized protein OS=Sus scrofa OX=9823 GN=MRPL41 PE=1 SV=1	tr|A0A287AWS0|A0A287AWS0_PIG	0	0.222934
Reticulon OS=Sus scrofa OX=9823 GN=RTN1 PE=1 SV=2	tr|I3L6J1|I3L6J1_PIG	0.475968	0.223487
Uncharacterized protein OS=Sus scrofa OX=9823 GN=HSPA4L PE=1 SV=1	tr|A0A287AGN3|A0A287AGN3_PIG	1.58816	0.224083
Uncharacterized protein OS=Sus scrofa OX=9823 GN=CTTN PE=1 SV=1	tr|A0A287AUL3|A0A287AUL3_PIG	0.255089	0.224541
Clathrin light chain OS=Sus scrofa OX=9823 GN=CLTB PE=1 SV=3	tr|F1S398|F1S398_PIG	0.348996	0.224605
Ras-related protein Rab-5A OS=Sus scrofa OX=9823 GN=RAB5A PE=2 SV=1	sp|Q06AU6|RAB5A_PIG	1.77929	0.224804
Uncharacterized protein OS=Sus scrofa OX=9823 GN=C12orf57 PE=1 SV=1	tr|A0A287A018|A0A287A018_PIG	0.147281	0.225592
Polyubiquitin-C OS=Sus scrofa OX=9823 GN=UBC PE=2 SV=1	sp|P0CG68|UBC_PIG (+1)	0.727852	0.225826
3-ketoacyl-CoA thiolase, peroxisomal isoform X1 OS=Sus scrofa OX=9823 GN=ACAA1 PE=1 SV=2	tr|F1RRB7|F1RRB7_PIG	0.440264	0.226754
26S proteasome non-ATPase regulatory subunit 2 OS=Sus scrofa OX=9823 GN=PSMD2 PE=1 SV=1	tr|A0A287AN02|A0A287AN02_PIG	1.94458	0.226911
4-trimethylaminobutyraldehyde dehydrogenase OS=Sus scrofa OX=9823 GN=ALDH9A1 PE=1 SV=1	tr|A0A286ZNV5|A0A286ZNV5_PIG	1.97372	0.227041
Plasminogen activator inhibitor 1 RNA-binding protein isoform 1 OS=Sus scrofa OX=9823 GN=SERBP1 PE=1 SV=2	tr|F1S827|F1S827_PIG	0.34871	0.227515
Uncharacterized protein OS=Sus scrofa OX=9823 GN=LOC100622780 PE=1 SV=1	tr|A0A286ZRK0|A0A286ZRK0_PIG	0	0.228181
Peptidylprolyl isomerase OS=Sus scrofa OX=9823 GN=LOC100738909 PE=1 SV=1	tr|F2Z5F0|F2Z5F0_PIG	0	0.228181
Acetyl-CoA acetyltransferase, cytosolic OS=Sus scrofa OX=9823 GN=ACAT2 PE=1 SV=1	tr|A0A287AHQ0|A0A287AHQ0_PIG	1.4848	0.22949
Glutamate dehydrogenase 1, mitochondrial OS=Sus scrofa OX=9823 GN=GLUD1 PE=1 SV=1	tr|F1SEN2|F1SEN2_PIG	1.46732	0.229581
2-iminobutanoate/2-iminopropanoate deaminase OS=Sus scrofa OX=9823 GN=RIDA PE=1 SV=1	tr|A0A286ZNH3|A0A286ZNH3_PIG	0.291565	0.22997
Spectrin beta chain OS=Sus scrofa OX=9823 GN=SPTBN1 PE=1 SV=1	tr|A0A287BJV2|A0A287BJV2_PIG	1.55608	0.230049
Thioredoxin domain-containing protein 12 OS=Sus scrofa OX=9823 GN=TXNDC12 PE=1 SV=3	tr|F1S6G4|F1S6G4_PIG	0.154645	0.230113
Uncharacterized protein OS=Sus scrofa OX=9823 GN=CDH13 PE=1 SV=1	tr|A0A287ALP4|A0A287ALP4_PIG	0.685373	0.230239
Uncharacterized protein OS=Sus scrofa OX=9823 GN=CHMP5 PE=1 SV=3	tr|F1SE87|F1SE87_PIG	0	0.230685
Uncharacterized protein OS=Sus scrofa OX=9823 GN=NPTXR PE=4 SV=2	tr|F1SNX9|F1SNX9_PIG	0.110442	0.232336
F-actin-capping protein subunit beta OS=Sus scrofa OX=9823 GN=CAPZB PE=1 SV=1	tr|D2JYW4|D2JYW4_PIG	1.68584	0.233464
Uncharacterized protein OS=Sus scrofa OX=9823 GN=PPP1R9A PE=1 SV=1	tr|A0A286ZJP9|A0A286ZJP9_PIG (+2)	0.198578	0.234448
Alpha-actinin-4 isoform X1 OS=Sus scrofa OX=9823 GN=ACTN4 PE=1 SV=3	tr|F1RI39|F1RI39_PIG	1.72326	0.234776
Bifunctional epoxide hydrolase 2 OS=Sus scrofa OX=9823 GN=EPHX2 PE=2 SV=1	sp|Q6Q2C2|HYES_PIG (+1)	1.78947	0.235658
ATP-dependent (S)-NAD(P)H-hydrate dehydratase OS=Sus scrofa OX=9823 GN=CARKD PE=1 SV=2	tr|I3LS60|I3LS60_PIG	0.224682	0.235934
Uncharacterized protein OS=Sus scrofa OX=9823 GN=NFASC PE=1 SV=1	tr|A0A287ARR9|A0A287ARR9_PIG	1.40002	0.2368
Dystrobrevin OS=Sus scrofa OX=9823 GN=DTNA PE=1 SV=1	tr|A0A287A9E8|A0A287A9E8_PIG (+1)	0.220898	0.236873
Cell division control protein 42 homolog OS=Sus scrofa OX=9823 GN=CDC42 PE=2 SV=2	sp|Q007T2|CDC42_PIG	2.02255	0.236874
Platelet factor 4 OS=Sus scrofa OX=9823 GN=PF4 PE=1 SV=2	sp|P30034|PLF4_PIG (+1)	0.179015	0.237228
Uncharacterized protein OS=Sus scrofa OX=9823 GN=PCP4 PE=4 SV=1	tr|A0A286ZI58|A0A286ZI58_PIG	0	0.23775
Uncharacterized protein OS=Sus scrofa OX=9823 PE=1 SV=1	tr|A0A287BAB5|A0A287BAB5_PIG	0	0.23775
Osteopontin OS=Sus scrofa OX=9823 GN=SPP1 PE=1 SV=1	sp|P14287|OSTP_PIG	0	0.23775
Multiprotein bridging factor 1 OS=Sus scrofa OX=9823 GN=MBF1 PE=1 SV=1	tr|A6N8P5|A6N8P5_PIG	0	0.23775
CapZ-interacting protein isoform 1 OS=Sus scrofa OX=9823 GN=RCSD1 PE=1 SV=3	tr|F1S269|F1S269_PIG	0	0.23775
Uncharacterized protein OS=Sus scrofa OX=9823 GN=PENK PE=1 SV=1	tr|A0A287ASX7|A0A287ASX7_PIG (+1)	0	0.237843
Saposin-B-Val OS=Sus scrofa OX=9823 GN=PSAP PE=1 SV=1	tr|A0A286ZVG0|A0A286ZVG0_PIG	0	0.237843
Uncharacterized protein OS=Sus scrofa OX=9823 GN=TWF2 PE=1 SV=1	tr|F1SIX7|F1SIX7_PIG	2.47045	0.237849
Lactoylglutathione lyase OS=Sus scrofa OX=9823 GN=GLO1 PE=1 SV=1	tr|I3LDM7|I3LDM7_PIG	0.444662	0.238231
Limbic system-associated membrane protein isoform 1 preproprotein OS=Sus scrofa OX=9823 GN=LSAMP PE=1 SV=2	tr|I3LEZ3|I3LEZ3_PIG	0.567879	0.238441
Complement C4-A isoform 1 preproprotein OS=Sus scrofa OX=9823 GN=C4A PE=1 SV=2	tr|F1RQW2|F1RQW2_PIG	2.06751	0.23867
GrpE protein homolog OS=Sus scrofa OX=9823 GN=GRPEL1 PE=1 SV=1	tr|A0A287AD92|A0A287AD92_PIG	0.122188	0.238711
T-complex protein 1 subunit gamma OS=Sus scrofa OX=9823 GN=CCT3 PE=1 SV=1	tr|A0A287AMZ2|A0A287AMZ2_PIG	1.93886	0.239151
Coronin OS=Sus scrofa OX=9823 GN=CORO1A PE=1 SV=2	tr|I3LR17|I3LR17_PIG	1.75033	0.239524
ERO1-like protein alpha OS=Sus scrofa OX=9823 GN=ERO1A PE=2 SV=1	sp|B6CVD7|ERO1A_PIG (+1)	1.73875	0.239693
Uncharacterized protein OS=Sus scrofa OX=9823 GN=DDX17 PE=1 SV=1	tr|A0A286ZLI8|A0A286ZLI8_PIG (+1)	1.86647	0.241017
Uncharacterized protein OS=Sus scrofa OX=9823 GN=CCT8 PE=1 SV=2	tr|I3LCA2|I3LCA2_PIG	1.57458	0.241312
Uncharacterized protein OS=Sus scrofa OX=9823 GN=PSMC3 PE=1 SV=1	tr|A0A286ZT52|A0A286ZT52_PIG (+1)	0.847692	0.241727
Uncharacterized protein OS=Sus scrofa OX=9823 GN=CPNE6 PE=1 SV=3	tr|F1SGL6|F1SGL6_PIG	1.53895	0.241882
Alpha-actinin-2 isoform 1 OS=Sus scrofa OX=9823 GN=ACTN2 PE=1 SV=1	tr|F1RHL9|F1RHL9_PIG	2.10313	0.242125
Uncharacterized protein OS=Sus scrofa OX=9823 GN=VPS51 PE=1 SV=1	tr|A0A287AGP8|A0A287AGP8_PIG	2.44677	0.243191
Uncharacterized protein OS=Sus scrofa OX=9823 GN=CDV3 PE=1 SV=2	tr|I3LUE6|I3LUE6_PIG	0	0.244204
Uncharacterized protein OS=Sus scrofa OX=9823 GN=HNRNPC PE=1 SV=1	tr|A0A286ZK74|A0A286ZK74_PIG (+2)	0.16007	0.244703
Uncharacterized protein OS=Sus scrofa OX=9823 GN=BAG3 PE=1 SV=1	tr|A0A287APJ3|A0A287APJ3_PIG (+1)	0	0.24508
Uncharacterized protein OS=Sus scrofa OX=9823 GN=UBQLN1 PE=1 SV=1	tr|A0A287A8H1|A0A287A8H1_PIG (+2)	0.185366	0.245603
Uncharacterized protein OS=Sus scrofa OX=9823 GN=HDGF PE=1 SV=1	tr|F1RHJ2|F1RHJ2_PIG	0	0.246231
CRIP2 OS=Sus scrofa OX=9823 GN=CRIP2 PE=1 SV=1	tr|A0A165DE67|A0A165DE67_PIG	0.228489	0.246913
Uncharacterized protein OS=Sus scrofa OX=9823 GN=NSFL1C PE=1 SV=2	tr|F1S880|F1S880_PIG	0.366598	0.248075
Tubulin polymerization promoting protein p25 alpha OS=Sus scrofa OX=9823 GN=TPPP PE=1 SV=1	tr|B1Q0K1|B1Q0K1_PIG	0.624865	0.249479
Uncharacterized protein OS=Sus scrofa OX=9823 GN=WDR47 PE=1 SV=2	tr|F1S5Y8|F1S5Y8_PIG	2.55348	0.250054
Uncharacterized protein OS=Sus scrofa OX=9823 GN=SEPT8 PE=1 SV=1	tr|A0A287AWW1|A0A287AWW1_PIG	1.73823	0.250111
PDZ and LIM domain protein 3 OS=Sus scrofa OX=9823 GN=PDLIM3 PE=1 SV=1	tr|I3L9B6|I3L9B6_PIG	0	0.250114
Thimet oligopeptidase OS=Sus scrofa OX=9823 GN=THOP1 PE=2 SV=2	sp|P47788|THOP1_PIG	1.83067	0.252458
NADH dehydrogenase [ubiquinone] 1 alpha subcomplex subunit 12 OS=Sus scrofa OX=9823 GN=NDUFA12 PE=1 SV=2	tr|F1SQP4|F1SQP4_PIG	2.01203	0.253124
Ragulator complex protein LAMTOR5 OS=Sus scrofa OX=9823 GN=LAMTOR5 PE=3 SV=2	sp|Q66X52|LTOR5_PIG	0	0.253781
ATP synthase subunit e, mitochondrial OS=Sus scrofa OX=9823 GN=ATP5ME PE=3 SV=4	sp|Q9MYT8|ATP5I_PIG	0.185779	0.253879
Uncharacterized protein OS=Sus scrofa OX=9823 GN=GPLD1 PE=1 SV=1	tr|A0A287AHX3|A0A287AHX3_PIG (+1)	4.60104	0.254486
Hematopoietic lineage cell-specific protein isoform 1 OS=Sus scrofa OX=9823 GN=HCLS1 PE=1 SV=1	tr|A0A287B4N2|A0A287B4N2_PIG (+1)	0	0.255624
Vinculin OS=Sus scrofa OX=9823 GN=VCL PE=1 SV=1	tr|A0A2C9F393|A0A2C9F393_PIG	0.31114	0.256039
Syntaphilin OS=Sus scrofa OX=9823 GN=SNPH PE=4 SV=1	tr|A0A287AQ59|A0A287AQ59_PIG	0.317866	0.256315
Cell adhesion molecule 3 isoform 1 OS=Sus scrofa OX=9823 GN=CADM3 PE=1 SV=1	tr|A0A286ZQM3|A0A286ZQM3_PIG (+1)	1.29426	0.256479
Uncharacterized protein OS=Sus scrofa OX=9823 GN=SLIRP PE=1 SV=2	tr|I3LKV0|I3LKV0_PIG	0	0.256571
Microtubule-associated protein OS=Sus scrofa OX=9823 GN=MAP2 PE=1 SV=2	tr|F1SSS6|F1SSS6_PIG	0.365199	0.258104
Uncharacterized protein OS=Sus scrofa OX=9823 GN=EEF1B2 PE=1 SV=1	tr|F1SHD6|F1SHD6_PIG	0.429716	0.258154
Heat shock cognate 71 kDa protein isoform X1 OS=Sus scrofa OX=9823 GN=HSPA8 PE=1 SV=3	tr|F1S9Q1|F1S9Q1_PIG	1.21644	0.258447
Heterogeneous nuclear ribonucleoprotein D0 isoform c OS=Sus scrofa OX=9823 GN=HNRNPD PE=1 SV=1	tr|A0A286ZIN0|A0A286ZIN0_PIG (+1)	0.617676	0.258833
Proteasome activator complex subunit 2 OS=Sus scrofa OX=9823 GN=PSME2 PE=4 SV=3	tr|F1SGM3|F1SGM3_PIG	0.182877	0.259322
Uncharacterized protein OS=Sus scrofa OX=9823 GN=MRPL12 PE=1 SV=1	tr|A0A287ARV8|A0A287ARV8_PIG	0	0.260533
Uncharacterized protein OS=Sus scrofa OX=9823 GN=UGT8 PE=3 SV=1	tr|A0A287BQE9|A0A287BQE9_PIG (+1)	2.78121	0.261099
Adenylate kinase isoenzyme 1 OS=Sus scrofa OX=9823 GN=AK1 PE=1 SV=1	sp|P00571|KAD1_PIG (+1)	0.359715	0.261352
Myosin regulatory light chain 12A isoform 2 OS=Sus scrofa OX=9823 GN=LOC733637 PE=1 SV=1	tr|A0A287A0J0|A0A287A0J0_PIG (+2)	0.562587	0.262272
Phospholipid phosphatase-related protein type 4 OS=Sus scrofa OX=9823 GN=PLPPR4 PE=4 SV=2	tr|F1S553|F1S553_PIG	0.110465	0.263302
Uncharacterized protein OS=Sus scrofa OX=9823 GN=IQSEC2 PE=4 SV=3	tr|F1RUI3|F1RUI3_PIG	2.4421	0.263518
Uncharacterized protein OS=Sus scrofa OX=9823 GN=PEBP1 PE=1 SV=1	tr|F1RKG8|F1RKG8_PIG	0.56238	0.265498
Heat shock protein beta-1 OS=Sus scrofa OX=9823 GN=HSPB1 PE=2 SV=1	sp|Q5S1U1|HSPB1_PIG (+1)	0.336409	0.26554
Moesin OS=Sus scrofa OX=9823 GN=MSN PE=1 SV=1	tr|A0A287AK19|A0A287AK19_PIG (+1)	1.37107	0.265741
Uncharacterized protein OS=Sus scrofa OX=9823 GN=CARMIL2 PE=4 SV=2	tr|I3L6E9|I3L6E9_PIG (+1)	0	0.266678
Actin-related protein 2/3 complex subunit 5 OS=Sus scrofa OX=9823 GN=ARPC5 PE=1 SV=1	tr|B5APV0|B5APV0_PIG	0.218723	0.268429
ATP synthase subunit d, mitochondrial OS=Sus scrofa OX=9823 GN=ATP5PD PE=1 SV=1	tr|A0A287B0C3|A0A287B0C3_PIG (+1)	0.421218	0.268711
Ectonucleotide pyrophosphatase/phosphodiesterase family member 6 OS=Sus scrofa OX=9823 GN=ENPP6 PE=2 SV=2	sp|Q58D68|ENPP6_PIG (+1)	1.81282	0.268866
LIM and calponin homology domains-containing protein 1 isoform X18 OS=Sus scrofa OX=9823 GN=LIMCH1 PE=1 SV=1	tr|A0A287AMS3|A0A287AMS3_PIG	0	0.269482
Microtubule-associated protein OS=Sus scrofa OX=9823 GN=MAP4 PE=1 SV=1	tr|A0A287AY86|A0A287AY86_PIG	0.0336207	0.269741
Uncharacterized protein OS=Sus scrofa OX=9823 GN=BPHL PE=1 SV=3	tr|F1RWY7|F1RWY7_PIG	2.32847	0.270006
Uncharacterized protein OS=Sus scrofa OX=9823 GN=MAP1A PE=1 SV=3	tr|F1SI65|F1SI65_PIG	0.41815	0.270175
Dihydropteridine reductase OS=Sus scrofa OX=9823 GN=QDPR PE=2 SV=1	sp|Q8MJ30|DHPR_PIG	1.52072	0.271627
Sodium/potassium-transporting ATPase subunit beta-1 OS=Sus scrofa OX=9823 GN=ATP1B1 PE=1 SV=2	sp|P05027|AT1B1_PIG	1.26583	0.271776
Uncharacterized protein OS=Sus scrofa OX=9823 GN=SEPT2 PE=1 SV=1	tr|A0A287A8W9|A0A287A8W9_PIG (+1)	1.18093	0.272098
Reticulon OS=Sus scrofa OX=9823 GN=RTN1 PE=1 SV=1	tr|I3LBH0|I3LBH0_PIG	2.27289	0.272295
Protein S100 OS=Sus scrofa OX=9823 GN=S100A16 PE=1 SV=1	tr|F2Z5M4|F2Z5M4_PIG	0.177017	0.272583
Uncharacterized protein OS=Sus scrofa OX=9823 GN=BSN PE=1 SV=1	tr|A0A287A274|A0A287A274_PIG	0.277139	0.272891
Wiskott-Aldrich syndrome protein family member 2 isoform 2 OS=Sus scrofa OX=9823 GN=WASF2 PE=1 SV=3	tr|F1STN6|F1STN6_PIG	0.240313	0.272892
Beta-synuclein OS=Sus scrofa OX=9823 GN=SNCB PE=1 SV=1	tr|A8QW48|A8QW48_PIG	0.327899	0.273817
Uncharacterized protein OS=Sus scrofa OX=9823 GN=NEDD8 PE=1 SV=1	tr|A0A287AE63|A0A287AE63_PIG	0.363599	0.27455
Neurofilament medium polypeptide OS=Sus scrofa OX=9823 GN=NEFM PE=1 SV=3	tr|F1RJU6|F1RJU6_PIG	1.38517	0.276375
40S ribosomal protein S21 OS=Sus scrofa OX=9823 GN=RPS21 PE=1 SV=1	sp|P63221|RS21_PIG	0.183031	0.276464
Uncharacterized protein OS=Sus scrofa OX=9823 GN=PITHD1 PE=1 SV=2	tr|I3L9H4|I3L9H4_PIG	0.315898	0.276571
Uncharacterized protein OS=Sus scrofa OX=9823 GN=LYSMD1 PE=4 SV=1	tr|F1SSY1|F1SSY1_PIG	0	0.277033
Phosphoglycerate mutase OS=Sus scrofa OX=9823 GN=PGAM1 PE=1 SV=1	tr|A0A287AJQ2|A0A287AJQ2_PIG (+1)	1.24558	0.277156
Eukaryotic translation initiation factor 5A OS=Sus scrofa OX=9823 GN=EIF5A PE=1 SV=1	tr|A0A287B356|A0A287B356_PIG	0.639691	0.280147
Uncharacterized protein OS=Sus scrofa OX=9823 GN=MACF1 PE=1 SV=1	tr|A0A287AEG1|A0A287AEG1_PIG (+2)	1.9214	0.280398
E3 ubiquitin-protein ligase HUWE1 isoform X9 OS=Sus scrofa OX=9823 GN=HUWE1 PE=1 SV=2	tr|F1RUH0|F1RUH0_PIG (+1)	2.01082	0.281191
Ubiquitin-conjugating enzyme E2L 3 OS=Sus scrofa OX=9823 GN=UBE2L3 PE=1 SV=1	tr|B8Y648|B8Y648_PIG	0	0.281546
Vesicle-associated membrane protein-associated protein B OS=Sus scrofa OX=9823 GN=VAPB PE=4 SV=1	tr|A0A287B186|A0A287B186_PIG	0.357473	0.282323
Heat shock protein 105 kDa isoform 1 OS=Sus scrofa OX=9823 GN=HSPH1 PE=1 SV=1	tr|F1RST0|F1RST0_PIG	1.39106	0.283157
Mitochondrial import inner membrane translocase subunit Tim9 isoform a OS=Sus scrofa OX=9823 GN=TIMM9 PE=1 SV=1	tr|F1SSK4|F1SSK4_PIG	0	0.283652
Uncharacterized protein OS=Sus scrofa OX=9823 GN=IRGQ PE=1 SV=1	tr|A0A287BJ85|A0A287BJ85_PIG	0	0.283691
Uncharacterized protein OS=Sus scrofa OX=9823 GN=DKK3 PE=1 SV=1	tr|A0A286ZNN6|A0A286ZNN6_PIG (+1)	0	0.283721
Uncharacterized protein OS=Sus scrofa OX=9823 GN=GYG1 PE=1 SV=1	tr|A0A286ZUI9|A0A286ZUI9_PIG (+1)	2.42625	0.283884
Ubiquitin-like modifier-activating enzyme 1 isoform X2 OS=Sus scrofa OX=9823 GN=UBA1 PE=1 SV=2	tr|K7GRY0|K7GRY0_PIG	1.54425	0.284063
WD repeat-containing protein 44 OS=Sus scrofa OX=9823 GN=WDR44 PE=2 SV=1	tr|M3TYU5|M3TYU5_PIG	0.128877	0.284593
Pyridoxal kinase OS=Sus scrofa OX=9823 GN=PDXK PE=1 SV=1	tr|A0A286ZIG4|A0A286ZIG4_PIG	1.69297	0.285338
Sorting nexin-2 isoform 1 OS=Sus scrofa OX=9823 GN=SNX2 PE=1 SV=1	tr|A0A286ZUZ1|A0A286ZUZ1_PIG (+2)	0.289938	0.28659
V-type proton ATPase subunit G 2 OS=Sus scrofa OX=9823 GN=ATP6V1G2 PE=3 SV=1	sp|Q9TSV6|VATG2_PIG	0.0957001	0.287499
Uncharacterized protein OS=Sus scrofa OX=9823 GN=NRCAM PE=1 SV=1	tr|A0A286ZPV9|A0A286ZPV9_PIG (+5)	0.529767	0.288745
Tropomyosin alpha-1 chain OS=Sus scrofa OX=9823 GN=TPM1 PE=1 SV=1	tr|A0A287BRY0|A0A287BRY0_PIG	0.251563	0.288798
Uncharacterized protein OS=Sus scrofa OX=9823 GN=PCBD1 PE=1 SV=1	tr|F1SUB1|F1SUB1_PIG	0	0.289092
Uncharacterized protein OS=Sus scrofa OX=9823 GN=RAC1 PE=1 SV=1	tr|A0A287B4G4|A0A287B4G4_PIG	1.42127	0.289423
Protein AF1q OS=Sus scrofa OX=9823 GN=MLLT11 PE=1 SV=1	tr|F1SSX7|F1SSX7_PIG	0	0.289445
Uncharacterized protein OS=Sus scrofa OX=9823 GN=HNRNPM PE=1 SV=1	tr|A0A286ZJK2|A0A286ZJK2_PIG	0.62159	0.28945
NADH-cytochrome b5 reductase 3 (Fragment) OS=Sus scrofa OX=9823 GN=CYB5R3 PE=1 SV=1	sp|P83686|NB5R3_PIG	2.25981	0.289938
Cytochrome c oxidase subunit 5A, mitochondrial OS=Sus scrofa OX=9823 GN=COX5A PE=1 SV=1	tr|F1SJ34|F1SJ34_PIG	0.499239	0.289944
Glutaredoxin-1 OS=Sus scrofa OX=9823 GN=GLRX PE=1 SV=2	sp|P12309|GLRX1_PIG	0.270177	0.290703
40S ribosomal protein SA OS=Sus scrofa OX=9823 GN=RPSA PE=1 SV=3	sp|Q4GWZ2|RSSA_PIG (+1)	1.72392	0.290736
Claudin OS=Sus scrofa OX=9823 GN=CLDN11 PE=2 SV=1	tr|C3VMK7|C3VMK7_PIG	2.26412	0.290992
Uncharacterized protein OS=Sus scrofa OX=9823 GN=LRP1 PE=1 SV=2	tr|K7GS03|K7GS03_PIG	1.85446	0.291286
Uncharacterized protein OS=Sus scrofa OX=9823 GN=CAND2 PE=1 SV=1	tr|F1SQ89|F1SQ89_PIG	2.43252	0.292023
Ras-related protein M-Ras isoform X1 OS=Sus scrofa OX=9823 GN=MRAS PE=1 SV=1	tr|I3LQN1|I3LQN1_PIG	2.29116	0.292157
Uncharacterized protein OS=Sus scrofa OX=9823 GN=WBP2 PE=1 SV=2	tr|I3LC26|I3LC26_PIG	0	0.292919
Uncharacterized protein OS=Sus scrofa OX=9823 GN=UBE2V2 PE=1 SV=2	tr|I3L6T2|I3L6T2_PIG	0.322724	0.293208
Calponin OS=Sus scrofa OX=9823 GN=CNN3 PE=1 SV=2	tr|F1S543|F1S543_PIG	0.658573	0.29324
Uncharacterized protein OS=Sus scrofa OX=9823 GN=SYNGAP1 PE=4 SV=1	tr|A0A287BNM2|A0A287BNM2_PIG (+1)	1.90074	0.294258
Uncharacterized protein OS=Sus scrofa OX=9823 GN=FAM114A2 PE=1 SV=3	tr|F1RQC1|F1RQC1_PIG	0	0.294615
Proteasome activator complex subunit 1 OS=Sus scrofa OX=9823 GN=PSME1 PE=4 SV=2	tr|F1SGM1|F1SGM1_PIG	0	0.294615
Uncharacterized protein OS=Sus scrofa OX=9823 GN=NDUFA7 PE=1 SV=2	tr|F1SA62|F1SA62_PIG	0.0594833	0.295877
Uncharacterized protein OS=Sus scrofa OX=9823 GN=NDEL1 PE=4 SV=1	tr|A0A286ZPG8|A0A286ZPG8_PIG (+2)	0.0566653	0.297551
60S acidic ribosomal protein P2 OS=Sus scrofa OX=9823 GN=RPLP2 PE=1 SV=1	tr|F1RYZ0|F1RYZ0_PIG	0.273393	0.297582
Serine/threonine-protein phosphatase 2A 55 kDa regulatory subunit B OS=Sus scrofa OX=9823 GN=PPP2R2A PE=3 SV=1	tr|F2Z509|F2Z509_PIG	1.69475	0.298335
Uncharacterized protein OS=Sus scrofa OX=9823 GN=EIF4G1 PE=1 SV=1	tr|A0A287A1Z9|A0A287A1Z9_PIG	2.41405	0.298547
40S ribosomal protein S19 OS=Sus scrofa OX=9823 GN=RPS19 PE=1 SV=2	tr|F1RGG1|F1RGG1_PIG	0.331876	0.299167
Uncharacterized protein OS=Sus scrofa OX=9823 GN=ELOB PE=1 SV=1	tr|F1SUG4|F1SUG4_PIG	0.556671	0.299453
Uncharacterized protein OS=Sus scrofa OX=9823 GN=PCDH1 PE=1 SV=1	tr|A0A286ZKU6|A0A286ZKU6_PIG	0.40427	0.300021
Acyl-CoA-binding protein OS=Sus scrofa OX=9823 GN=DBI PE=1 SV=2	sp|P12026|ACBP_PIG	0.224343	0.300103
Uncharacterized protein OS=Sus scrofa OX=9823 GN=MTURN PE=1 SV=1	tr|A0A286ZWP7|A0A286ZWP7_PIG	0.168893	0.300264
WD repeat-containing protein 1 OS=Sus scrofa OX=9823 GN=WDR1 PE=2 SV=1	tr|K9IVR7|K9IVR7_PIG	1.67937	0.301226
Kinesin light chain 2 isoform X1 OS=Sus scrofa OX=9823 GN=KLC2 PE=1 SV=3	tr|F1RU40|F1RU40_PIG	0	0.301227
Lumican OS=Sus scrofa OX=9823 GN=LUM PE=1 SV=1	tr|F1SQ09|F1SQ09_PIG	0.220709	0.302281
Molybdopterin molybdenumtransferase OS=Sus scrofa OX=9823 GN=GPHN PE=1 SV=3	tr|F1SA44|F1SA44_PIG	1.84408	0.30274
28S ribosomal protein S36, mitochondrial OS=Sus scrofa OX=9823 GN=MRPS36 PE=1 SV=1	tr|A0A287B719|A0A287B719_PIG	0.331073	0.302863
Pyridoxine-5'-phosphate oxidase OS=Sus scrofa OX=9823 GN=PNPO PE=1 SV=1	tr|A0A287BB89|A0A287BB89_PIG	0.308396	0.303148
Uncharacterized protein OS=Sus scrofa OX=9823 GN=TOM1 PE=1 SV=1	tr|A0A287AZ22|A0A287AZ22_PIG (+1)	0.496293	0.303815
Catenin delta-1 isoform 1A OS=Sus scrofa OX=9823 GN=CTNND1 PE=1 SV=1	tr|A0A287BBS6|A0A287BBS6_PIG (+1)	0.0813741	0.304001
Uncharacterized protein OS=Sus scrofa OX=9823 GN=MAG PE=4 SV=3	tr|F1RM75|F1RM75_PIG	0.722242	0.304154
Tetratricopeptide repeat protein 1 OS=Sus scrofa OX=9823 GN=TTC1 PE=1 SV=1	tr|A0A287AVJ6|A0A287AVJ6_PIG	0.337348	0.304825
Uncharacterized protein OS=Sus scrofa OX=9823 GN=AHSA1 PE=4 SV=1	tr|F1SE06|F1SE06_PIG	1.70307	0.304963
Uncharacterized protein OS=Sus scrofa OX=9823 GN=LOC110259958 PE=1 SV=1	tr|F1RGX4|F1RGX4_PIG	0.588347	0.305425
Serine/threonine-protein kinase BRSK1 OS=Sus scrofa OX=9823 GN=BRSK1 PE=4 SV=1	tr|A0A287AXR1|A0A287AXR1_PIG	0.257741	0.305486
Tropomodulin-1 OS=Sus scrofa OX=9823 GN=TMOD1 PE=1 SV=1	tr|A0A287BJ41|A0A287BJ41_PIG	0.319372	0.306404
F-actin-capping protein subunit alpha-2 OS=Sus scrofa OX=9823 GN=CAPZA2 PE=2 SV=3	sp|Q29221|CAZA2_PIG	1.47451	0.307062
Phosphodiesterase OS=Sus scrofa OX=9823 GN=PDE2A PE=1 SV=2	tr|I3LNQ5|I3LNQ5_PIG	2.21121	0.30707
Uncharacterized protein OS=Sus scrofa OX=9823 GN=ACTR1A PE=1 SV=1	tr|F2Z5G5|F2Z5G5_PIG	1.40636	0.307134
Flavin reductase (NADPH) OS=Sus scrofa OX=9823 GN=BLVRB PE=1 SV=2	tr|I3LQH7|I3LQH7_PIG	0.706654	0.308216
Beta-arrestin-1 isoform X1 OS=Sus scrofa OX=9823 GN=ARRB1 PE=1 SV=1	tr|A0A286ZND1|A0A286ZND1_PIG (+3)	2.18754	0.308361
Uncharacterized protein OS=Sus scrofa OX=9823 GN=HIP1 PE=1 SV=2	tr|F1RKC0|F1RKC0_PIG	2.30426	0.308601
Uncharacterized protein OS=Sus scrofa OX=9823 GN=SYN2 PE=1 SV=1	tr|A0A287ALW8|A0A287ALW8_PIG	1.41908	0.30865
Eukaryotic translation initiation factor 4B isoform 2 OS=Sus scrofa OX=9823 PE=4 SV=1	tr|A0A287AT83|A0A287AT83_PIG	0	0.30873
Protein-L-isoaspartate(D-aspartate) O-methyltransferase OS=Sus scrofa OX=9823 GN=PCMT1 PE=1 SV=3	sp|P80895|PIMT_PIG (+1)	0.394426	0.309291
V-type proton ATPase subunit D OS=Sus scrofa OX=9823 GN=ATP6V1D PE=1 SV=1	tr|A0A286ZJL5|A0A286ZJL5_PIG	2.35025	0.309403
Uncharacterized protein OS=Sus scrofa OX=9823 GN=AIMP1 PE=1 SV=1	tr|A0A287AKA2|A0A287AKA2_PIG (+1)	0.178444	0.309548
Uncharacterized protein OS=Sus scrofa OX=9823 PE=4 SV=1	tr|A0A286ZJ38|A0A286ZJ38_PIG	3.63017	0.309918
Actin-related protein 2/3 complex subunit 5 OS=Sus scrofa OX=9823 GN=ARPC5L PE=1 SV=1	tr|B5APV1|B5APV1_PIG	0.370092	0.310813
40S ribosomal protein S20 OS=Sus scrofa OX=9823 GN=RPS20 PE=1 SV=1	sp|A1XQU9|RS20_PIG (+1)	0.171835	0.311057
Uncharacterized protein OS=Sus scrofa OX=9823 GN=PICALM PE=1 SV=3	tr|F1STS9|F1STS9_PIG	3.94617	0.312421
Uncharacterized protein OS=Sus scrofa OX=9823 PE=1 SV=2	tr|A0A075B7I5|A0A075B7I5_PIG	2.17211	0.312906
Transcription factor BTF3 OS=Sus scrofa OX=9823 GN=BTF3L4 PE=1 SV=1	tr|A0A287BEU1|A0A287BEU1_PIG	0	0.313056
Uncharacterized protein OS=Sus scrofa OX=9823 PE=4 SV=1	tr|A0A287A013|A0A287A013_PIG	1.40428	0.313425
Lactotransferrin OS=Sus scrofa OX=9823 GN=LTF PE=1 SV=1	tr|Q6YT39|Q6YT39_PIG	1.9905	0.313917
Uncharacterized protein OS=Sus scrofa OX=9823 GN=HINT1 PE=1 SV=1	tr|F1RKI3|F1RKI3_PIG	0.258579	0.314101
Dihydrolipoyllysine-residue succinyltransferase component of 2-oxoglutarate dehydrogenase complex, mitochondrial OS=Sus scrofa OX=9823 GN=DLST PE=1 SV=1	sp|Q9N0F1|ODO2_PIG	1.56574	0.314135
Eukaryotic translation initiation factor 4H isoform 2 OS=Sus scrofa OX=9823 GN=EIF4H PE=1 SV=1	tr|I3L594|I3L594_PIG	0.529263	0.314444
Peptidyl-prolyl cis-trans isomerase OS=Sus scrofa OX=9823 GN=PIN1 PE=1 SV=1	tr|I3LLH5|I3LLH5_PIG	0.243244	0.314801
Uncharacterized protein OS=Sus scrofa OX=9823 GN=SNX12 PE=1 SV=1	tr|A0A286ZKH8|A0A286ZKH8_PIG (+1)	0.154653	0.315564
Chloride intracellular channel protein OS=Sus scrofa OX=9823 GN=CLIC1 PE=3 SV=1	tr|A0A287B2P1|A0A287B2P1_PIG	0.295568	0.316272
60S ribosomal protein L23 OS=Sus scrofa OX=9823 GN=RPL23 PE=1 SV=1	sp|P62831|RL23_PIG	0.262439	0.317453
Methionine adenosyltransferase 2 subunit beta OS=Sus scrofa OX=9823 GN=MAT2B PE=1 SV=1	tr|A0A287AEU6|A0A287AEU6_PIG (+1)	2.19637	0.31888
Uncharacterized protein OS=Sus scrofa OX=9823 GN=VCAN PE=1 SV=3	tr|F1REZ2|F1REZ2_PIG	0.443253	0.319287
26S proteasome non-ATPase regulatory subunit 1 OS=Sus scrofa OX=9823 GN=PSMD1 PE=1 SV=3	tr|F1SMW9|F1SMW9_PIG	1.92899	0.319398
Radixin OS=Sus scrofa OX=9823 GN=RDX PE=1 SV=3	tr|F1SV14|F1SV14_PIG	1.61566	0.319661
Uncharacterized protein OS=Sus scrofa OX=9823 GN=SHANK3 PE=4 SV=1	tr|A0A287ASF0|A0A287ASF0_PIG	0	0.320553
Uncharacterized protein OS=Sus scrofa OX=9823 GN=WASF1 PE=4 SV=3	tr|F1RSY8|F1RSY8_PIG	0.434567	0.321277
Uncharacterized protein OS=Sus scrofa OX=9823 GN=GATD3A PE=1 SV=1	tr|A0A287ANM8|A0A287ANM8_PIG	0.37968	0.322156
Uncharacterized protein OS=Sus scrofa OX=9823 GN=YWHAQ PE=1 SV=3	tr|F1SA98|F1SA98_PIG	1.45858	0.322628
Platelet-activating factor acetylhydrolase IB subunit alpha OS=Sus scrofa OX=9823 GN=PAFAH1B1 PE=2 SV=3	sp|Q9GL51|LIS1_PIG (+1)	1.64147	0.323575
Uncharacterized protein OS=Sus scrofa OX=9823 GN=SHANK2 PE=4 SV=1	tr|A0A287AFG9|A0A287AFG9_PIG	0.0684304	0.324173
Tryptophan--tRNA ligase, cytoplasmic OS=Sus scrofa OX=9823 GN=WARS PE=1 SV=1	tr|K9IVV5|K9IVV5_PIG	1.62089	0.324988
Glucose-6-phosphate 1-dehydrogenase OS=Sus scrofa OX=9823 GN=G6PD PE=1 SV=1	tr|A0A286ZY10|A0A286ZY10_PIG	1.80278	0.32558
DJ-1 protein OS=Sus scrofa OX=9823 GN=PARK7 PE=1 SV=1	tr|Q0R678|Q0R678_PIG	0.555483	0.326627
Uncharacterized protein OS=Sus scrofa OX=9823 GN=ACTN1 PE=1 SV=1	tr|I3LLY3|I3LLY3_PIG	1.57723	0.327975
Dystroglycan OS=Sus scrofa OX=9823 GN=DAG1 PE=2 SV=2	sp|Q29243|DAG1_PIG	0.0777618	0.328019
Uncharacterized protein OS=Sus scrofa OX=9823 GN=SYNPO PE=4 SV=1	tr|A0A286ZLL9|A0A286ZLL9_PIG	0.200616	0.328196
Rab GDP dissociation inhibitor OS=Sus scrofa OX=9823 GN=GDI2 PE=1 SV=1	tr|F1RUK8|F1RUK8_PIG	1.28753	0.329039
Isopentenyl-diphosphate Delta-isomerase 1 isoform X2 OS=Sus scrofa OX=9823 GN=LOC100625049 PE=1 SV=1	tr|I3LDY2|I3LDY2_PIG	0.120824	0.329304
Uncharacterized protein OS=Sus scrofa OX=9823 GN=MLF2 PE=1 SV=1	tr|F1SLT1|F1SLT1_PIG	0.110469	0.330069
Uncharacterized protein OS=Sus scrofa OX=9823 GN=PCBP1 PE=1 SV=1	tr|I3LEC2|I3LEC2_PIG	0.784987	0.331704
Uncharacterized protein OS=Sus scrofa OX=9823 GN=PTPRZ1 PE=1 SV=1	tr|A0A286ZVC4|A0A286ZVC4_PIG (+1)	0.42702	0.331776
CB1 cannabinoid receptor-interacting protein 1 isoform CRIP1a OS=Sus scrofa OX=9823 GN=CNRIP1 PE=1 SV=1	tr|F2Z5U6|F2Z5U6_PIG	0.440071	0.332299
Acylphosphatase-1 OS=Sus scrofa OX=9823 GN=ACYP1 PE=1 SV=2	sp|P24540|ACYP1_PIG (+1)	0.154776	0.332724
Prophenin and tritrpticin precursor (Fragment) OS=Sus scrofa OX=9823 PE=1 SV=1	sp|P51524|PF11_PIG	0.221786	0.333455
Uncharacterized protein OS=Sus scrofa OX=9823 GN=SPAG9 PE=1 SV=1	tr|A0A287AW88|A0A287AW88_PIG	0.407102	0.333984
Uncharacterized protein OS=Sus scrofa OX=9823 GN=BSG PE=1 SV=1	tr|A0A286ZS77|A0A286ZS77_PIG	1.23493	0.334852
Uncharacterized protein OS=Sus scrofa OX=9823 GN=ICAM5 PE=1 SV=2	tr|I3L697|I3L697_PIG	0.510024	0.336463
Uncharacterized protein OS=Sus scrofa OX=9823 GN=GGA3 PE=1 SV=3	tr|F1RVX3|F1RVX3_PIG	0.290038	0.338074
Uncharacterized protein OS=Sus scrofa OX=9823 PE=4 SV=1	tr|A0A287AA42|A0A287AA42_PIG	1.6281	0.339203
Uncharacterized protein OS=Sus scrofa OX=9823 GN=KBTBD11 PE=1 SV=2	tr|I3LS86|I3LS86_PIG	2.08636	0.339203
Septin 11 OS=Sus scrofa OX=9823 GN=SEPT11 PE=1 SV=1	tr|A0A173G6G6|A0A173G6G6_PIG (+2)	1.8887	0.340085
Uncharacterized protein OS=Sus scrofa OX=9823 GN=CD99L2 PE=1 SV=3	tr|F1RQ20|F1RQ20_PIG	0.227428	0.340951
RuvB-like helicase OS=Sus scrofa OX=9823 GN=RUVBL1 PE=1 SV=3	tr|F1SPF6|F1SPF6_PIG	2.23392	0.34173
Alpha-soluble NSF attachment protein OS=Sus scrofa OX=9823 GN=NAPA PE=1 SV=2	tr|F1RLB6|F1RLB6_PIG	1.49188	0.34192
Uncharacterized protein OS=Sus scrofa OX=9823 GN=DCTN2 PE=1 SV=3	tr|F1SKF9|F1SKF9_PIG	0.436633	0.343872
Integrin beta OS=Sus scrofa OX=9823 GN=ITGB1 PE=1 SV=2	tr|K7GNY7|K7GNY7_PIG	0.342701	0.34408
Uncharacterized protein OS=Sus scrofa OX=9823 GN=HSPE1 PE=1 SV=1	tr|F1SMZ6|F1SMZ6_PIG	0.393816	0.344141
Uncharacterized protein OS=Sus scrofa OX=9823 GN=UBE2M PE=1 SV=1	tr|A0A287BNE4|A0A287BNE4_PIG	0.342782	0.344145
Rho GDP dissociation inhibitor alpha OS=Sus scrofa OX=9823 GN=ARHGDIA PE=2 SV=1	tr|E7EI20|E7EI20_PIG	1.29384	0.346186
Microtubule-associated protein 1B isoform 1 OS=Sus scrofa OX=9823 GN=MAP1B PE=1 SV=1	tr|A0A287BL20|A0A287BL20_PIG	0.680019	0.346418
Uncharacterized protein OS=Sus scrofa OX=9823 GN=ARHGDIB PE=1 SV=1	tr|A0A287B0I3|A0A287B0I3_PIG	0.66194	0.346651
Glutamine amidotransferase-like class 1 domain-containing protein 1 isoform 1 OS=Sus scrofa OX=9823 GN=GATD1 PE=1 SV=3	tr|F1RYY7|F1RYY7_PIG	1.62214	0.347122
Peptidyl-prolyl cis-trans isomerase OS=Sus scrofa OX=9823 GN=PPIF PE=1 SV=1	tr|F1S2E3|F1S2E3_PIG	0.0689265	0.347628
Abl interactor 1 isoform b OS=Sus scrofa OX=9823 GN=ABI1 PE=1 SV=1	tr|A0A287BCJ4|A0A287BCJ4_PIG (+3)	0.236812	0.348454
Uncharacterized protein OS=Sus scrofa OX=9823 GN=DPP7 PE=1 SV=1	tr|A0A286ZJD8|A0A286ZJD8_PIG	0.339096	0.349046
Uncharacterized protein OS=Sus scrofa OX=9823 GN=STIP1 PE=1 SV=2	tr|I3LNG8|I3LNG8_PIG	0.532676	0.349381
Cytoskeleton-associated protein 1 OS=Sus scrofa OX=9823 GN=CKAP1 PE=1 SV=1	tr|Q8HXL4|Q8HXL4_PIG	0.181947	0.349411
Spectrin beta chain OS=Sus scrofa OX=9823 GN=SPTBN4 PE=3 SV=1	tr|A0A286ZJ09|A0A286ZJ09_PIG	1.5872	0.350218
Uncharacterized protein OS=Sus scrofa OX=9823 GN=SPTA1 PE=1 SV=3	tr|F1RNB8|F1RNB8_PIG	0.330554	0.353507
Small glutamine-rich tetratricopeptide repeat-containing protein alpha isoform X1 OS=Sus scrofa OX=9823 GN=SGTA PE=1 SV=1	tr|F1S8G6|F1S8G6_PIG	0.456915	0.3542
Prostaglandin-H2 D-isomerase OS=Sus scrofa OX=9823 GN=PTGDS PE=1 SV=1	sp|Q29095|PTGDS_PIG (+1)	0.275557	0.354347
Uncharacterized protein OS=Sus scrofa OX=9823 GN=AKAP2 PE=1 SV=1	tr|A0A286ZVZ8|A0A286ZVZ8_PIG	0.352774	0.355351
Non-specific serine/threonine protein kinase OS=Sus scrofa OX=9823 GN=AKT3 PE=1 SV=1	tr|A0A287BC23|A0A287BC23_PIG	2.15136	0.356346
Uncharacterized protein OS=Sus scrofa OX=9823 GN=ASAH1 PE=1 SV=1	tr|A0A287B5G7|A0A287B5G7_PIG	2.15136	0.356346
Aquaporin-4 isoform M1 OS=Sus scrofa OX=9823 GN=AQP4 PE=1 SV=1	tr|A0A287AVU9|A0A287AVU9_PIG	1.77759	0.359425
Uncharacterized protein OS=Sus scrofa OX=9823 GN=HDHD2 PE=1 SV=1	tr|F1RZX9|F1RZX9_PIG	1.58864	0.360132
Putative tyrosine-protein phosphatase auxilin isoform 1 OS=Sus scrofa OX=9823 GN=DNAJC6 PE=1 SV=1	tr|A0A287BGR3|A0A287BGR3_PIG	1.47997	0.360309
Uncharacterized protein OS=Sus scrofa OX=9823 GN=GPR158 PE=1 SV=1	tr|A0A287BJY1|A0A287BJY1_PIG	0.326267	0.36133
Myotrophin OS=Sus scrofa OX=9823 GN=MTPN PE=1 SV=1	tr|K9IVW4|K9IVW4_PIG	0.33188	0.362429
Synaptosomal-associated protein OS=Sus scrofa OX=9823 GN=SNAP25 PE=1 SV=1	tr|I3LAV3|I3LAV3_PIG	0.655793	0.362853
MICOS complex subunit OS=Sus scrofa OX=9823 GN=CHCHD3 PE=1 SV=1	tr|A0A286ZUS4|A0A286ZUS4_PIG	1.58225	0.363689
Uncharacterized protein OS=Sus scrofa OX=9823 GN=PTK2 PE=3 SV=1	tr|A0A286ZL12|A0A286ZL12_PIG (+2)	2.03378	0.364037
Calreticulin OS=Sus scrofa OX=9823 GN=CALR PE=1 SV=3	sp|P28491|CALR_PIG	0.676337	0.364877
Uncharacterized protein OS=Sus scrofa OX=9823 GN=STAM PE=1 SV=3	tr|F1RWA6|F1RWA6_PIG (+1)	0.374083	0.365224
Mitochondrial fission 1 protein OS=Sus scrofa OX=9823 GN=FIS1 PE=1 SV=1	tr|A0A287ADK7|A0A287ADK7_PIG	0.433524	0.365724
Actin-related protein 2/3 complex subunit 4 OS=Sus scrofa OX=9823 GN=ARPC4 PE=1 SV=1	tr|B5APU9|B5APU9_PIG	1.5468	0.366875
Myelin-oligodendrocyte glycoprotein OS=Sus scrofa OX=9823 GN=MOG PE=3 SV=1	tr|A0A287A7V5|A0A287A7V5_PIG	1.4761	0.366901
Serine racemase isoform X1 OS=Sus scrofa OX=9823 GN=SRR PE=4 SV=1	tr|A0A287ASY9|A0A287ASY9_PIG	2.03135	0.367237
Uncharacterized protein OS=Sus scrofa OX=9823 GN=DLG1 PE=1 SV=3	tr|F1SQX7|F1SQX7_PIG	1.27361	0.367916
Uncharacterized protein OS=Sus scrofa OX=9823 GN=IGBP1 PE=1 SV=1	tr|K7GQ35|K7GQ35_PIG	0.23192	0.367986
Uncharacterized protein OS=Sus scrofa OX=9823 GN=NUDT5 PE=1 SV=2	tr|F1RUP7|F1RUP7_PIG	0.410188	0.368439
Ketimine reductase mu-crystallin isoform X1 OS=Sus scrofa OX=9823 GN=CRYM PE=1 SV=2	tr|F1RPC8|F1RPC8_PIG	0.464326	0.368476
Acetyltransferase component of pyruvate dehydrogenase complex OS=Sus scrofa OX=9823 GN=DLAT PE=3 SV=3	tr|F1SMB2|F1SMB2_PIG	1.45068	0.368706
Proteasome subunit alpha type OS=Sus scrofa OX=9823 GN=PSMA2 PE=1 SV=1	tr|I3LAB6|I3LAB6_PIG	0.181613	0.370706
Uncharacterized protein OS=Sus scrofa OX=9823 GN=CCT6A PE=1 SV=2	tr|I3L9J4|I3L9J4_PIG	1.53837	0.370938
Cytochrome b5 OS=Sus scrofa OX=9823 GN=CYB5A PE=1 SV=3	sp|P00172|CYB5_PIG	0.473508	0.371202
Methyl-CpG binding protein 2 OS=Sus scrofa OX=9823 GN=MECP2 PE=1 SV=4	tr|F1RZT9|F1RZT9_PIG	0.372195	0.371391
Succinate--CoA ligase [GDP-forming] subunit beta, mitochondrial (Fragment) OS=Sus scrofa OX=9823 GN=SUCLG2 PE=1 SV=2	sp|P53590|SUCB2_PIG (+3)	1.55487	0.371666
Dihydrolipoamide acetyltransferase component of pyruvate dehydrogenase complex OS=Sus scrofa OX=9823 GN=PDHX PE=1 SV=2	tr|F1SGT3|F1SGT3_PIG	1.77182	0.371789
Prophenin-2 OS=Sus scrofa OX=9823 PE=2 SV=1	sp|P51525|PF12_PIG	0	0.373901
Uncharacterized protein OS=Sus scrofa OX=9823 PE=1 SV=7	tr|I3L6U3|I3L6U3_PIG	0	0.373901
Uncharacterized protein OS=Sus scrofa OX=9823 GN=AHNAK PE=1 SV=1	tr|A0A286ZPY1|A0A286ZPY1_PIG	0	0.373901
Uncharacterized protein OS=Sus scrofa OX=9823 GN=AHNAK2 PE=1 SV=1	tr|A0A286ZXM0|A0A286ZXM0_PIG (+1)	0	0.373901
Uncharacterized protein OS=Sus scrofa OX=9823 PE=4 SV=1	tr|A0A286ZIG0|A0A286ZIG0_PIG (+1)	0	0.373901
Uncharacterized protein OS=Sus scrofa OX=9823 GN=ATXN2L PE=1 SV=1	tr|A0A287AV57|A0A287AV57_PIG	0	0.373901
Uncharacterized protein OS=Sus scrofa OX=9823 GN=SORBS1 PE=1 SV=1	tr|A0A286ZJC9|A0A286ZJC9_PIG	0	0.373901
Parvalbumin alpha OS=Sus scrofa OX=9823 GN=PVALB PE=1 SV=1	tr|F1SKJ8|F1SKJ8_PIG	0	0.373901
ATP synthase-coupling factor 6, mitochondrial OS=Sus scrofa OX=9823 GN=ATP5PF PE=1 SV=1	sp|P13618|ATP5J_PIG (+1)	0	0.373901
Ras GTPase-activating protein-binding protein 1 OS=Sus scrofa OX=9823 GN=G3BP1 PE=1 SV=1	tr|A0A286ZTN5|A0A286ZTN5_PIG	0	0.373901
Uncharacterized protein OS=Sus scrofa OX=9823 GN=NOVA1 PE=1 SV=1	tr|A0A287A9A5|A0A287A9A5_PIG	0	0.373901
Uncharacterized protein OS=Sus scrofa OX=9823 PE=4 SV=1	tr|A0A287AV26|A0A287AV26_PIG (+1)	0	0.373901
Putative monooxygenase p33MONOX isoform a OS=Sus scrofa OX=9823 GN=KIAA1191 PE=1 SV=2	tr|F1S387|F1S387_PIG	0	0.373901
Uncharacterized protein OS=Sus scrofa OX=9823 GN=TXN2 PE=1 SV=2	tr|F1SKJ2|F1SKJ2_PIG	0	0.373901
Uncharacterized protein OS=Sus scrofa OX=9823 GN=NOVA2 PE=1 SV=1	tr|A0A286ZQL5|A0A286ZQL5_PIG	0	0.373901
Cancer-related nucleoside-triphosphatase isoform 1 OS=Sus scrofa OX=9823 GN=NTPCR PE=1 SV=3	tr|F1RGU8|F1RGU8_PIG	0	0.373901
Eukaryotic translation initiation factor 1b OS=Sus scrofa OX=9823 GN=EIF1B PE=3 SV=1	sp|P61220|EIF1B_PIG	0	0.373901
Prothymosin alpha OS=Sus scrofa OX=9823 GN=PTMA PE=1 SV=1	tr|C3VVV8|C3VVV8_PIG	0	0.373901
Histone cluster 1 H1 family member d OS=Sus scrofa OX=9823 GN=HIST1H1D PE=1 SV=1	tr|F6PYW2|F6PYW2_PIG	0	0.373901
39S ribosomal protein L13, mitochondrial OS=Sus scrofa OX=9823 GN=MRPL13 PE=1 SV=2	tr|K7GP19|K7GP19_PIG	0	0.373901
Beta-2-microglobulin OS=Sus scrofa OX=9823 GN=B2M PE=1 SV=1	sp|Q07717|B2MG_PIG (+1)	0	0.373901
Uncharacterized protein OS=Sus scrofa OX=9823 GN=PFDN6 PE=1 SV=1	tr|F1RZT2|F1RZT2_PIG	0	0.373901
Receptor-type tyrosine-protein phosphatase N2 isoform X1 OS=Sus scrofa OX=9823 GN=PTPRN2 PE=4 SV=1	tr|A0A287AZZ0|A0A287AZZ0_PIG	0	0.373901
Transcription factor BTF3 OS=Sus scrofa OX=9823 GN=BTF3 PE=1 SV=1	tr|A0A287BJ88|A0A287BJ88_PIG (+1)	0	0.373901
Cdc42 effector protein 1 isoform X1 OS=Sus scrofa OX=9823 GN=CDC42EP1 PE=4 SV=1	tr|I3LT56|I3LT56_PIG	0	0.373901
Uncharacterized protein OS=Sus scrofa OX=9823 GN=EIF1 PE=4 SV=1	tr|F2Z553|F2Z553_PIG	0	0.373901
Metallothionein-3 OS=Sus scrofa OX=9823 GN=MT3 PE=2 SV=1	sp|P55944|MT3_PIG	0	0.373901
N-acetylglucosamine-6-sulfatase OS=Sus scrofa OX=9823 GN=GNS PE=1 SV=1	tr|A0A286ZUW1|A0A286ZUW1_PIG (+2)	0	0.373901
NADH dehydrogenase ubiquinone flavoprotein 3, mitochondrial isoform X1-like OS=Sus scrofa OX=9823 GN=NDUFV3 PE=4 SV=1	tr|A0A287AWH6|A0A287AWH6_PIG	0	0.373901
Alpha-mannosidase OS=Sus scrofa OX=9823 GN=MAN2B1 PE=3 SV=2	tr|F1SEY1|F1SEY1_PIG	0	0.373901
Thymosin beta-4 OS=Sus scrofa OX=9823 GN=TMSB4 PE=3 SV=3	sp|Q95274|TYB4_PIG	0	0.373901
Uncharacterized protein OS=Sus scrofa OX=9823 GN=MCRIP1 PE=4 SV=1	tr|A0A287AWN1|A0A287AWN1_PIG	0	0.373901
Uncharacterized protein OS=Sus scrofa OX=9823 GN=ADCY3 PE=1 SV=1	tr|A0A287BPU6|A0A287BPU6_PIG	0	0.373901
Uncharacterized protein OS=Sus scrofa OX=9823 GN=ISCU PE=1 SV=2	tr|I3LR64|I3LR64_PIG	0	0.373901
Cathepsin L1 OS=Sus scrofa OX=9823 GN=CTSL PE=2 SV=1	sp|Q28944|CATL1_PIG	0	0.373901
SNARE-associated protein Snapin OS=Sus scrofa OX=9823 GN=SNAPIN PE=1 SV=1	tr|A0A286ZUD5|A0A286ZUD5_PIG	0	0.373901
Translocase of inner mitochondrial membrane 10 OS=Sus scrofa OX=9823 GN=TIMM10 PE=1 SV=1	tr|A0A286ZVD0|A0A286ZVD0_PIG	0	0.373901
Uncharacterized protein OS=Sus scrofa OX=9823 GN=TMEM263 PE=1 SV=1	tr|A0A287B182|A0A287B182_PIG	0	0.373901
ATP synthase, H+ transporting, mitochondrial F1 complex, epsilon subunit OS=Sus scrofa OX=9823 GN=ATP5E PE=1 SV=1	tr|A5GFX4|A5GFX4_PIG	0	0.373901
Ubiquilin-4 isoform 1 OS=Sus scrofa OX=9823 GN=UBQLN4 PE=1 SV=2	tr|F1RLP9|F1RLP9_PIG	0	0.373901
Uncharacterized protein OS=Sus scrofa OX=9823 GN=REPS1 PE=1 SV=2	tr|F1S6Z2|F1S6Z2_PIG	0	0.373901
PDZ domain-containing protein 11 OS=Sus scrofa OX=9823 GN=PDZD11 PE=2 SV=1	sp|Q6QA76|PDZ11_PIG	0	0.373901
Uncharacterized protein OS=Sus scrofa OX=9823 GN=LOC100512195 PE=4 SV=1	tr|A0A286ZNR9|A0A286ZNR9_PIG	0	0.373901
Uncharacterized protein OS=Sus scrofa OX=9823 GN=AKAP2 PE=1 SV=1	tr|A0A287AC94|A0A287AC94_PIG	0	0.373901
Beta-catenin-interacting protein 1 OS=Sus scrofa OX=9823 GN=CTNNBIP1 PE=4 SV=1	tr|A0A287ADI4|A0A287ADI4_PIG	0	0.373901
Uncharacterized protein OS=Sus scrofa OX=9823 GN=SNU13 PE=4 SV=1	tr|A0A287AI22|A0A287AI22_PIG (+1)	0	0.373901
Uncharacterized protein KIAA1211-like isoform X3 OS=Sus scrofa OX=9823 GN=KIAA1211L PE=4 SV=1	tr|A0A287AXW8|A0A287AXW8_PIG	0	0.373901
MCEE OS=Sus scrofa OX=9823 GN=MCEE PE=1 SV=1	tr|A1XQS7|A1XQS7_PIG	0	0.373901
WAS/WASL-interacting protein family member 2 OS=Sus scrofa OX=9823 GN=WIPF2 PE=1 SV=1	tr|F1RXC5|F1RXC5_PIG	0	0.373901
Proline-rich transmembrane protein 3 OS=Sus scrofa OX=9823 GN=PRRT3 PE=4 SV=2	tr|F1SQC7|F1SQC7_PIG	0	0.373901
Alpha-endosulfine OS=Sus scrofa OX=9823 GN=ENSA PE=1 SV=1	sp|P68211|ENSA_PIG (+2)	0	0.373901
Neuroendocrine protein 7B2 OS=Sus scrofa OX=9823 GN=SCG5 PE=4 SV=1	tr|A0A286ZUR8|A0A286ZUR8_PIG	0	0.373901
Neuron navigator 1 isoform X3 OS=Sus scrofa OX=9823 GN=NAV1 PE=1 SV=1	tr|A0A287A797|A0A287A797_PIG (+1)	0	0.373901
U6 snRNA-associated Sm-like protein LSm4 OS=Sus scrofa OX=9823 GN=LSM4 PE=3 SV=1	tr|A0A287AKQ5|A0A287AKQ5_PIG	0	0.373901
Uncharacterized protein OS=Sus scrofa OX=9823 PE=4 SV=1	tr|A0A287AW94|A0A287AW94_PIG	0	0.373901
RNA-binding protein 14 isoform 1 OS=Sus scrofa OX=9823 GN=RBM14 PE=1 SV=1	tr|A0A287B401|A0A287B401_PIG	0	0.373901
Arf-GAP with SH3 domain, ANK repeat and PH domain-containing protein 2 isoform a OS=Sus scrofa OX=9823 GN=ASAP2 PE=1 SV=1	tr|A0A287B4V4|A0A287B4V4_PIG	0	0.373901
U1 small nuclear ribonucleoprotein C OS=Sus scrofa OX=9823 GN=SNRPC PE=1 SV=1	tr|A0A287BG27|A0A287BG27_PIG (+1)	0	0.373901
Small nuclear ribonucleoprotein Sm D2 OS=Sus scrofa OX=9823 GN=SNRPD2 PE=1 SV=1	tr|A0A287BQU7|A0A287BQU7_PIG	0	0.373901
Uncharacterized protein OS=Sus scrofa OX=9823 PE=1 SV=1	tr|A0A287BRA2|A0A287BRA2_PIG	0	0.373901
Uncharacterized protein OS=Sus scrofa OX=9823 PE=4 SV=3	tr|F1S832|F1S832_PIG	0	0.373901
Uncharacterized protein OS=Sus scrofa OX=9823 GN=GRM5 PE=3 SV=2	tr|I3LCR7|I3LCR7_PIG (+1)	0	0.373901
Uncharacterized protein OS=Sus scrofa OX=9823 GN=GAA PE=1 SV=2	tr|I3LQL8|I3LQL8_PIG (+1)	0	0.373901
RNA-binding protein 4B OS=Sus scrofa OX=9823 GN=RBM4B PE=2 SV=1	sp|Q06AT9|RBM4B_PIG	0	0.373901
Cystatin-B OS=Sus scrofa OX=9823 GN=CSTB PE=1 SV=1	sp|Q29290|CYTB_PIG	0	0.373901
Uncharacterized protein OS=Sus scrofa OX=9823 GN=HSPB8 PE=1 SV=1	tr|A0A286ZID4|A0A286ZID4_PIG	0	0.373901
Ataxin-2 isoform 2 OS=Sus scrofa OX=9823 GN=ATXN2 PE=1 SV=1	tr|A0A286ZTR7|A0A286ZTR7_PIG (+2)	0	0.373901
Dynein light chain roadblock OS=Sus scrofa OX=9823 GN=DYNLRB2 PE=3 SV=1	tr|A0A287ABY4|A0A287ABY4_PIG	0	0.373901
Uncharacterized protein OS=Sus scrofa OX=9823 GN=ANKRD34A PE=1 SV=1	tr|A0A287ALF7|A0A287ALF7_PIG	0	0.373901
Huntingtin interacting protein K OS=Sus scrofa OX=9823 GN=HYPK PE=4 SV=1	tr|A0A287BJN7|A0A287BJN7_PIG	0	0.373901
MKL/myocardin-like protein 2 isoform X2 OS=Sus scrofa OX=9823 GN=MRTFB PE=4 SV=1	tr|A0A287BT82|A0A287BT82_PIG	0	0.373901
Coiled-coil-helix-coiled-coil-helix domain-containing protein 2 OS=Sus scrofa OX=9823 GN=CHCHD2 PE=1 SV=2	tr|F1RIU9|F1RIU9_PIG	0	0.373901
Uncharacterized protein OS=Sus scrofa OX=9823 GN=LYSMD2 PE=4 SV=1	tr|F1RYP8|F1RYP8_PIG	0	0.373901
Taf15 OS=Sus scrofa OX=9823 GN=TAF15 PE=1 SV=3	tr|F1S187|F1S187_PIG	0	0.373901
Uncharacterized protein OS=Sus scrofa OX=9823 GN=FAM136A PE=1 SV=2	tr|F1SLD2|F1SLD2_PIG	0	0.373901
Uncharacterized protein OS=Sus scrofa OX=9823 GN=CARHSP1 PE=1 SV=2	tr|I3LCU9|I3LCU9_PIG	0	0.373901
RNA binding protein fox-1 homolog OS=Sus scrofa OX=9823 GN=RBFOX3 PE=4 SV=1	tr|A0A286ZN97|A0A286ZN97_PIG (+1)	0	0.373901
Uncharacterized protein OS=Sus scrofa OX=9823 GN=BTBD8 PE=4 SV=1	tr|A0A286ZU98|A0A286ZU98_PIG (+1)	0	0.373901
RNA binding protein fox-1 homolog OS=Sus scrofa OX=9823 GN=RBFOX1 PE=4 SV=1	tr|A0A286ZXS1|A0A286ZXS1_PIG (+1)	0	0.373901
Uncharacterized protein OS=Sus scrofa OX=9823 GN=ARFGAP2 PE=1 SV=1	tr|A0A287A3U5|A0A287A3U5_PIG (+1)	0	0.373901
Uncharacterized protein OS=Sus scrofa OX=9823 PE=4 SV=1	tr|A0A287AQM3|A0A287AQM3_PIG	0	0.373901
Serine/arginine-rich splicing factor 7 isoform 1 OS=Sus scrofa OX=9823 GN=SRSF7 PE=1 SV=1	tr|A0A287ASZ5|A0A287ASZ5_PIG (+2)	0	0.373901
Uncharacterized protein OS=Sus scrofa OX=9823 GN=SF1 PE=1 SV=1	tr|A0A287AZ25|A0A287AZ25_PIG (+2)	0	0.373901
Uncharacterized protein OS=Sus scrofa OX=9823 GN=SRRM2 PE=1 SV=1	tr|A0A287BBC3|A0A287BBC3_PIG	0	0.373901
Prefoldin subunit 1 OS=Sus scrofa OX=9823 GN=PFDN1 PE=1 SV=1	tr|A0A287BED1|A0A287BED1_PIG	0	0.373901
Short coiled-coil protein OS=Sus scrofa OX=9823 GN=SCOC PE=1 SV=1	tr|A0A287BPR6|A0A287BPR6_PIG	0	0.373901
Uncharacterized protein OS=Sus scrofa OX=9823 GN=SRSF3 PE=1 SV=2	tr|F1RY92|F1RY92_PIG	0	0.373901
39S ribosomal protein L43, mitochondrial isoform X2 OS=Sus scrofa OX=9823 GN=MRPL43 PE=1 SV=1	tr|F1S8U4|F1S8U4_PIG	0	0.373901
Uncharacterized protein OS=Sus scrofa OX=9823 GN=CAMK2N1 PE=4 SV=1	tr|I3LQ15|I3LQ15_PIG	0	0.373901
55 kDa erythrocyte membrane protein isoform 1 OS=Sus scrofa OX=9823 GN=MPP1 PE=1 SV=2	tr|K7GP41|K7GP41_PIG	0	0.373901
Sodium/hydrogen exchanger 1 OS=Sus scrofa OX=9823 GN=SLC9A1 PE=2 SV=1	sp|P48762|SL9A1_PIG (+1)	0	0.373901
Uncharacterized protein OS=Sus scrofa OX=9823 GN=ARSB PE=1 SV=1	tr|A0A286ZRI8|A0A286ZRI8_PIG (+1)	0	0.373901
Uncharacterized protein OS=Sus scrofa OX=9823 GN=CELSR2 PE=3 SV=1	tr|A0A287AEM7|A0A287AEM7_PIG	0	0.373901
Uncharacterized protein OS=Sus scrofa OX=9823 GN=HDGFL3 PE=1 SV=1	tr|A0A287AQQ1|A0A287AQQ1_PIG	0	0.373901
Uncharacterized protein OS=Sus scrofa OX=9823 GN=C7H15orf40 PE=1 SV=2	tr|F1RIB1|F1RIB1_PIG	0	0.373901
Stromal cell-derived factor 2 OS=Sus scrofa OX=9823 GN=SDF2 PE=1 SV=2	tr|F1RNB1|F1RNB1_PIG	0	0.373901
Uncharacterized protein OS=Sus scrofa OX=9823 GN=GOLM1 PE=1 SV=3	tr|F1S4I1|F1S4I1_PIG	0	0.373901
Ragulator complex protein LAMTOR3 isoform X2 OS=Sus scrofa OX=9823 GN=LAMTOR3 PE=1 SV=1	tr|F2Z5B8|F2Z5B8_PIG	0	0.373901
Protein dpy-30 homolog isoform 1 OS=Sus scrofa OX=9823 GN=DPY30 PE=1 SV=1	tr|F2Z5F7|F2Z5F7_PIG	0	0.373901
Uncharacterized protein OS=Sus scrofa OX=9823 GN=LMTK3 PE=1 SV=2	tr|I3L9F3|I3L9F3_PIG	0	0.373901
Uncharacterized protein OS=Sus scrofa OX=9823 GN=KHDRBS1 PE=1 SV=1	tr|I3LP11|I3LP11_PIG	0	0.373901
Protein phosphatase 1 regulatory subunit 14A OS=Sus scrofa OX=9823 GN=CPI17 PE=1 SV=1	sp|O18734|PP14A_PIG	0	0.373901
Chromogranin-A (Fragment) OS=Sus scrofa OX=9823 GN=CHGA PE=1 SV=2	sp|P04404|CMGA_PIG	0	0.373901
Homeodomain-only protein OS=Sus scrofa OX=9823 GN=HOPX PE=3 SV=1	sp|Q8MJD6|HOP_PIG (+2)	0	0.373901
RNA-binding protein Musashi homolog 2 isoform X2 OS=Sus scrofa OX=9823 GN=MSI2 PE=4 SV=1	tr|A0A286ZLC8|A0A286ZLC8_PIG (+5)	0	0.373901
Uncharacterized protein OS=Sus scrofa OX=9823 GN=MAP1S PE=1 SV=1	tr|A0A286ZUZ5|A0A286ZUZ5_PIG	0	0.373901
Uncharacterized protein OS=Sus scrofa OX=9823 GN=UBFD1 PE=1 SV=1	tr|A0A286ZV33|A0A286ZV33_PIG (+1)	0	0.373901
Uncharacterized protein OS=Sus scrofa OX=9823 GN=RALY PE=1 SV=1	tr|A0A286ZYT0|A0A286ZYT0_PIG (+1)	0	0.373901
Uncharacterized protein OS=Sus scrofa OX=9823 PE=4 SV=1	tr|A0A287A0C8|A0A287A0C8_PIG (+6)	0	0.373901
Uncharacterized protein OS=Sus scrofa OX=9823 GN=MAGI2 PE=4 SV=1	tr|A0A287AC12|A0A287AC12_PIG (+1)	0	0.373901
Uncharacterized protein OS=Sus scrofa OX=9823 GN=BCR PE=4 SV=1	tr|A0A287AIC4|A0A287AIC4_PIG	0	0.373901
Ribonuclease T2 OS=Sus scrofa OX=9823 GN=RNASET2 PE=1 SV=1	tr|A0A287ALP1|A0A287ALP1_PIG	0	0.373901
Uncharacterized protein OS=Sus scrofa OX=9823 GN=RAMAC PE=4 SV=1	tr|A0A287AT27|A0A287AT27_PIG	0	0.373901
Uncharacterized protein OS=Sus scrofa OX=9823 GN=NENF PE=1 SV=1	tr|A0A287B654|A0A287B654_PIG	0	0.373901
Double-stranded RNA-binding protein Staufen homolog 1 isoform b OS=Sus scrofa OX=9823 GN=STAU1 PE=1 SV=1	tr|A0A287B676|A0A287B676_PIG	0	0.373901
Uncharacterized protein OS=Sus scrofa OX=9823 GN=MAP6D1 PE=4 SV=1	tr|A0A287B6N3|A0A287B6N3_PIG	0	0.373901
Uncharacterized protein OS=Sus scrofa OX=9823 GN=FAM107B PE=4 SV=1	tr|A0A287B8I3|A0A287B8I3_PIG	0	0.373901
Uncharacterized protein OS=Sus scrofa OX=9823 GN=BOLA3 PE=1 SV=1	tr|A0A287BQV4|A0A287BQV4_PIG	0	0.373901
Dynactin 6 OS=Sus scrofa OX=9823 GN=DCTN6 PE=1 SV=1	tr|D0G6S1|D0G6S1_PIG	0	0.373901
Uncharacterized protein OS=Sus scrofa OX=9823 GN=MRPS17 PE=1 SV=1	tr|F1RIU0|F1RIU0_PIG	0	0.373901
Uncharacterized protein OS=Sus scrofa OX=9823 GN=GGACT PE=1 SV=3	tr|F1RP13|F1RP13_PIG	0	0.373901
Uncharacterized protein OS=Sus scrofa OX=9823 GN=TPBG PE=4 SV=1	tr|F1RQM0|F1RQM0_PIG	0	0.373901
39S ribosomal protein L27, mitochondrial OS=Sus scrofa OX=9823 GN=MRPL27 PE=1 SV=1	tr|F1RT79|F1RT79_PIG	0	0.373901
Uncharacterized protein OS=Sus scrofa OX=9823 GN=TSTD1 PE=1 SV=3	tr|F1S179|F1S179_PIG	0	0.373901
Uncharacterized protein OS=Sus scrofa OX=9823 GN=MRPL52 PE=1 SV=1	tr|F1S9B7|F1S9B7_PIG	0	0.373901
Uncharacterized protein OS=Sus scrofa OX=9823 GN=BOLA1 PE=3 SV=1	tr|F1SDF8|F1SDF8_PIG	0	0.373901
Uncharacterized protein OS=Sus scrofa OX=9823 GN=LRRC20 PE=1 SV=3	tr|F1SUC9|F1SUC9_PIG	0	0.373901
Uncharacterized protein OS=Sus scrofa OX=9823 GN=C6H1orf50 PE=1 SV=2	tr|I3LLQ7|I3LLQ7_PIG	0	0.373901
Uncharacterized protein OS=Sus scrofa OX=9823 GN=REPS2 PE=1 SV=2	tr|K7GL81|K7GL81_PIG (+1)	0	0.373901
Uncharacterized protein OS=Sus scrofa OX=9823 GN=TAB3 PE=4 SV=1	tr|K7GLN2|K7GLN2_PIG (+2)	0	0.373901
Small ubiquitin-related modifier 2 OS=Sus scrofa OX=9823 GN=SUMO2 PE=3 SV=1	sp|P61958|SUMO2_PIG	0	0.373901
Male-enhanced antigen 1 OS=Sus scrofa OX=9823 GN=MEA1 PE=2 SV=2	sp|Q95313|MEA1_PIG	0	0.373901
Uncharacterized protein OS=Sus scrofa OX=9823 GN=ILDR2 PE=4 SV=1	tr|A0A286ZKK4|A0A286ZKK4_PIG	0	0.373901
Sterile alpha motif domain-containing protein 12 isoform a OS=Sus scrofa OX=9823 GN=SAMD12 PE=4 SV=1	tr|A0A286ZKL4|A0A286ZKL4_PIG	0	0.373901
Uncharacterized protein OS=Sus scrofa OX=9823 GN=MTDH PE=1 SV=1	tr|A0A286ZU54|A0A286ZU54_PIG	0	0.373901
Mitotic spindle-associated MMXD complex subunit MIP18 OS=Sus scrofa OX=9823 GN=CIAO2B PE=4 SV=1	tr|A0A286ZVK9|A0A286ZVK9_PIG	0	0.373901
Uncharacterized protein OS=Sus scrofa OX=9823 GN=HS1BP3 PE=1 SV=1	tr|A0A286ZXF2|A0A286ZXF2_PIG (+1)	0	0.373901
Uncharacterized protein OS=Sus scrofa OX=9823 GN=PRCC PE=1 SV=1	tr|A0A286ZXZ3|A0A286ZXZ3_PIG	0	0.373901
39S ribosomal protein L23, mitochondrial OS=Sus scrofa OX=9823 GN=MRPL23 PE=1 SV=1	tr|A0A286ZZC6|A0A286ZZC6_PIG	0	0.373901
Uncharacterized protein OS=Sus scrofa OX=9823 GN=SHISA7 PE=4 SV=1	tr|A0A287ACI3|A0A287ACI3_PIG (+1)	0	0.373901
Uncharacterized protein OS=Sus scrofa OX=9823 GN=MLIP PE=1 SV=1	tr|A0A287AH49|A0A287AH49_PIG	0	0.373901
Uncharacterized protein OS=Sus scrofa OX=9823 GN=ABLIM1 PE=1 SV=1	tr|A0A287AIZ9|A0A287AIZ9_PIG (+1)	0	0.373901
Uncharacterized protein OS=Sus scrofa OX=9823 GN=RAD23A PE=1 SV=1	tr|A0A287ARC6|A0A287ARC6_PIG (+1)	0	0.373901
Protein PRRC2C isoform X3 OS=Sus scrofa OX=9823 GN=PRRC2C PE=1 SV=1	tr|A0A287AZP9|A0A287AZP9_PIG	0	0.373901
Uncharacterized protein OS=Sus scrofa OX=9823 GN=NUP50 PE=1 SV=1	tr|A0A287BFB9|A0A287BFB9_PIG (+1)	0	0.373901
Uncharacterized protein OS=Sus scrofa OX=9823 PE=1 SV=1	tr|A0A287BIA5|A0A287BIA5_PIG	0	0.373901
Uncharacterized protein OS=Sus scrofa OX=9823 GN=UQCC3 PE=4 SV=1	tr|A0A287BK40|A0A287BK40_PIG	0	0.373901
Uncharacterized protein OS=Sus scrofa OX=9823 GN=CDH6 PE=1 SV=1	tr|A0A287BKZ4|A0A287BKZ4_PIG	0	0.373901
Uncharacterized protein OS=Sus scrofa OX=9823 GN=NHP2 PE=1 SV=1	tr|A0A287BMH8|A0A287BMH8_PIG	0	0.373901
N-acetylmuramoyl-L-alanine amidase OS=Sus scrofa OX=9823 GN=PGLYRP2 PE=4 SV=1	tr|A0A287BRX5|A0A287BRX5_PIG	0	0.373901
Testis development-related protein 1 OS=Sus scrofa OX=9823 GN=TDRP1 PE=2 SV=1	tr|E3UV39|E3UV39_PIG	0	0.373901
Uncharacterized protein OS=Sus scrofa OX=9823 GN=KHDRBS3 PE=1 SV=3	tr|F1RRV9|F1RRV9_PIG	0	0.373901
Eukaryotic translation initiation factor 3 subunit G OS=Sus scrofa OX=9823 GN=EIF3G PE=1 SV=3	tr|F1S3I3|F1S3I3_PIG	0	0.373901
Uncharacterized protein OS=Sus scrofa OX=9823 GN=IBA57 PE=1 SV=2	tr|F1S5S1|F1S5S1_PIG	0	0.373901
Ubiquitin-conjugating enzyme E2L 6 OS=Sus scrofa OX=9823 GN=UBE2L6 PE=1 SV=1	tr|F4ZS20|F4ZS20_PIG	0	0.373901
Uncharacterized protein OS=Sus scrofa OX=9823 GN=CHMP1A PE=4 SV=1	tr|I3LU89|I3LU89_PIG	0	0.373901
Uncharacterized protein OS=Sus scrofa OX=9823 GN=MCFD2 PE=1 SV=2	tr|I3LV84|I3LV84_PIG (+1)	0	0.373901
MICOS complex subunit OS=Sus scrofa OX=9823 GN=APOOL PE=1 SV=1	tr|K7GNC6|K7GNC6_PIG	0	0.373901
Complement factor D OS=Sus scrofa OX=9823 GN=CFD PE=2 SV=1	sp|P51779|CFAD_PIG	0	0.373901
Cytochrome c oxidase subunit 7C, mitochondrial OS=Sus scrofa OX=9823 GN=COX7C PE=1 SV=1	sp|Q1W0Y2|COX7C_PIG	0	0.373901
Uncharacterized protein OS=Sus scrofa OX=9823 GN=VASP PE=4 SV=1	tr|A0A286ZJ91|A0A286ZJ91_PIG (+1)	0	0.373901
Uncharacterized protein OS=Sus scrofa OX=9823 GN=WNK2 PE=4 SV=1	tr|A0A286ZKV7|A0A286ZKV7_PIG (+2)	0	0.373901
Uncharacterized protein OS=Sus scrofa OX=9823 GN=AFDN PE=1 SV=1	tr|A0A286ZM64|A0A286ZM64_PIG (+3)	0	0.373901
Uncharacterized protein OS=Sus scrofa OX=9823 GN=CBL PE=1 SV=1	tr|A0A286ZQE1|A0A286ZQE1_PIG	0	0.373901
Uncharacterized protein OS=Sus scrofa OX=9823 GN=LSM14B PE=4 SV=1	tr|A0A286ZTF5|A0A286ZTF5_PIG	0	0.373901
Uncharacterized protein OS=Sus scrofa OX=9823 GN=CELF4 PE=1 SV=1	tr|A0A286ZU63|A0A286ZU63_PIG (+1)	0	0.373901
Uncharacterized protein OS=Sus scrofa OX=9823 GN=AAMDC PE=1 SV=1	tr|A0A286ZXA4|A0A286ZXA4_PIG	0	0.373901
Uncharacterized protein OS=Sus scrofa OX=9823 PE=1 SV=1	tr|A0A286ZZP5|A0A286ZZP5_PIG	0	0.373901
Uncharacterized protein OS=Sus scrofa OX=9823 GN=SH3KBP1 PE=1 SV=1	tr|A0A287A000|A0A287A000_PIG (+1)	0	0.373901
SHC-transforming protein 3 isoform X1 OS=Sus scrofa OX=9823 GN=SHC3 PE=4 SV=1	tr|A0A287A2M5|A0A287A2M5_PIG (+2)	0	0.373901
Tumor suppressing subtransferable candidate 4 OS=Sus scrofa OX=9823 GN=TSSC4 PE=4 SV=1	tr|A0A287A8Y0|A0A287A8Y0_PIG	0	0.373901
Uncharacterized protein OS=Sus scrofa OX=9823 GN=CAMSAP3 PE=3 SV=1	tr|A0A287A9F3|A0A287A9F3_PIG	0	0.373901
Uncharacterized protein OS=Sus scrofa OX=9823 GN=EIF2AK2 PE=1 SV=1	tr|A0A287ABT2|A0A287ABT2_PIG	0	0.373901
Uncharacterized protein OS=Sus scrofa OX=9823 GN=MAGI1 PE=4 SV=1	tr|A0A287AK60|A0A287AK60_PIG (+4)	0	0.373901
Splicing factor 3A subunit 2 OS=Sus scrofa OX=9823 GN=SF3A2 PE=1 SV=1	tr|A0A287AN25|A0A287AN25_PIG	0	0.373901
Splicing factor 3B subunit 5 OS=Sus scrofa OX=9823 GN=SF3B5 PE=1 SV=1	tr|A0A287AQ50|A0A287AQ50_PIG	0	0.373901
Uncharacterized protein OS=Sus scrofa OX=9823 GN=SYNPO2 PE=1 SV=1	tr|A0A287AUH9|A0A287AUH9_PIG	0	0.373901
Uncharacterized protein OS=Sus scrofa OX=9823 GN=LYRM4 PE=3 SV=1	tr|A0A287AUJ0|A0A287AUJ0_PIG	0	0.373901
Uncharacterized protein OS=Sus scrofa OX=9823 GN=UBXN1 PE=1 SV=1	tr|A0A287AZM3|A0A287AZM3_PIG (+1)	0	0.373901
Signal-induced proliferation-associated 1-like protein 1 isoform 3 OS=Sus scrofa OX=9823 GN=SIPA1L1 PE=4 SV=1	tr|A0A287B4Z1|A0A287B4Z1_PIG (+1)	0	0.373901
Uncharacterized protein OS=Sus scrofa OX=9823 GN=RBM3 PE=1 SV=1	tr|A0A287B5F5|A0A287B5F5_PIG	0	0.373901
Nuclear fragile X mental retardation-interacting protein 2 OS=Sus scrofa OX=9823 GN=NUFIP2 PE=4 SV=1	tr|A0A287BDA1|A0A287BDA1_PIG	0	0.373901
Uncharacterized protein OS=Sus scrofa OX=9823 GN=MFF PE=1 SV=1	tr|A0A287BJB9|A0A287BJB9_PIG	0	0.373901
Uncharacterized protein OS=Sus scrofa OX=9823 GN=PCNP PE=1 SV=1	tr|A0A287BLB5|A0A287BLB5_PIG	0	0.373901
Sequestosome-1 isoform 1 OS=Sus scrofa OX=9823 GN=SQSTM1 PE=4 SV=1	tr|A0A287BLE1|A0A287BLE1_PIG (+1)	0	0.373901
Uncharacterized protein OS=Sus scrofa OX=9823 GN=SRSF9 PE=1 SV=1	tr|F1RJJ0|F1RJJ0_PIG	0	0.373901
Uncharacterized protein OS=Sus scrofa OX=9823 GN=LOC100513346 PE=1 SV=2	tr|F1RK50|F1RK50_PIG	0	0.373901
Voltage-dependent calcium channel gamma-8 subunit OS=Sus scrofa OX=9823 GN=CACNG8 PE=3 SV=3	tr|F1RNJ2|F1RNJ2_PIG	0	0.373901
Uncharacterized protein OS=Sus scrofa OX=9823 GN=FAM171A2 PE=1 SV=3	tr|F1RQY9|F1RQY9_PIG	0	0.373901
Peptide-methionine (R)-S-oxide reductase OS=Sus scrofa OX=9823 GN=MSRB2 PE=1 SV=2	tr|F1RVI8|F1RVI8_PIG	0	0.373901
Uncharacterized protein OS=Sus scrofa OX=9823 GN=NAA10 PE=1 SV=2	tr|F1RZU5|F1RZU5_PIG (+3)	0	0.373901
Uncharacterized protein OS=Sus scrofa OX=9823 GN=CAMSAP1 PE=3 SV=3	tr|F1S018|F1S018_PIG	0	0.373901
Tubulin-specific chaperone A OS=Sus scrofa OX=9823 GN=TBCA PE=1 SV=2	tr|F1S2G3|F1S2G3_PIG	0	0.373901
Uncharacterized protein OS=Sus scrofa OX=9823 GN=USP10 PE=1 SV=3	tr|F1S5V0|F1S5V0_PIG	0	0.373901
Prolargin OS=Sus scrofa OX=9823 GN=PRELP PE=1 SV=3	tr|F1S6B4|F1S6B4_PIG	0	0.373901
Uncharacterized protein OS=Sus scrofa OX=9823 GN=DNAJC19 PE=1 SV=3	tr|F1SGA9|F1SGA9_PIG	0	0.373901
Uncharacterized protein OS=Sus scrofa OX=9823 GN=KCMF1 PE=1 SV=2	tr|F1SP03|F1SP03_PIG	0	0.373901
Neuropeptide Y OS=Sus scrofa OX=9823 GN=NPY PE=2 SV=1	tr|F1ST92|F1ST92_PIG	0	0.373901
Uncharacterized protein OS=Sus scrofa OX=9823 GN=KLHL35 PE=4 SV=2	tr|F1SUM8|F1SUM8_PIG	0	0.373901
Splicing factor 3B subunit 6 OS=Sus scrofa OX=9823 GN=SF3B6 PE=1 SV=1	tr|F2Z5F1|F2Z5F1_PIG	0	0.373901
Uncharacterized protein OS=Sus scrofa OX=9823 GN=MRPL50 PE=1 SV=1	tr|I3L9H6|I3L9H6_PIG	0	0.373901
Peptidyl-prolyl cis-trans isomerase OS=Sus scrofa OX=9823 GN=PIN4 PE=1 SV=1	tr|I3LBW5|I3LBW5_PIG	0	0.373901
UPF0449 protein C19orf25 isoform X1 OS=Sus scrofa OX=9823 GN=C19orf25 PE=4 SV=1	tr|I3LT16|I3LT16_PIG	0	0.373901
Uncharacterized protein OS=Sus scrofa OX=9823 GN=PIR PE=1 SV=1	tr|K7GKW6|K7GKW6_PIG	0	0.373901
Uncharacterized protein OS=Sus scrofa OX=9823 GN=HCFC1 PE=1 SV=2	tr|K7GSX0|K7GSX0_PIG	0	0.373901
Cadherin-5 OS=Sus scrofa OX=9823 GN=CDH5 PE=2 SV=1	sp|O02840|CADH5_PIG (+1)	0	0.373901
Metallothionein-2A OS=Sus scrofa OX=9823 GN=MT2A PE=3 SV=1	sp|P79379|MT2A_PIG	0	0.373901
Interferon alpha-inducible protein 6 OS=Sus scrofa OX=9823 GN=MRPS25 PE=1 SV=1	tr|A0A0M3KL55|A0A0M3KL55_PIG	0	0.373901
Uncharacterized protein OS=Sus scrofa OX=9823 GN=MRPS11 PE=1 SV=1	tr|A0A286ZJJ6|A0A286ZJJ6_PIG	0	0.373901
Uncharacterized protein OS=Sus scrofa OX=9823 GN=LSM6 PE=3 SV=1	tr|A0A286ZKR5|A0A286ZKR5_PIG	0	0.373901
Uncharacterized protein OS=Sus scrofa OX=9823 GN=CDC26 PE=4 SV=1	tr|A0A286ZWQ3|A0A286ZWQ3_PIG	0	0.373901
Uncharacterized protein OS=Sus scrofa OX=9823 GN=APC PE=4 SV=1	tr|A0A287A0Q9|A0A287A0Q9_PIG	0	0.373901
Uncharacterized protein OS=Sus scrofa OX=9823 GN=MERTK PE=1 SV=1	tr|A0A287A2E8|A0A287A2E8_PIG (+1)	0	0.373901
Ubiquitin-like protein 4A OS=Sus scrofa OX=9823 GN=UBL4A PE=1 SV=1	tr|A0A287A2J4|A0A287A2J4_PIG	0	0.373901
Ribosomal protein L19 OS=Sus scrofa OX=9823 GN=RPL19 PE=1 SV=1	tr|A0A287A5S4|A0A287A5S4_PIG (+2)	0	0.373901
Uncharacterized protein OS=Sus scrofa OX=9823 GN=TTBK1 PE=4 SV=1	tr|A0A287A973|A0A287A973_PIG (+1)	0	0.373901
Uncharacterized protein OS=Sus scrofa OX=9823 GN=YAP1 PE=4 SV=1	tr|A0A287AIA3|A0A287AIA3_PIG	0	0.373901
Uncharacterized protein OS=Sus scrofa OX=9823 GN=TXNDC5 PE=1 SV=1	tr|A0A287ARZ1|A0A287ARZ1_PIG	0	0.373901
Uncharacterized protein OS=Sus scrofa OX=9823 GN=UROS PE=4 SV=1	tr|A0A287AZN2|A0A287AZN2_PIG (+5)	0	0.373901
Uncharacterized protein OS=Sus scrofa OX=9823 GN=C11orf96 PE=4 SV=1	tr|A0A287B0P3|A0A287B0P3_PIG	0	0.373901
Uncharacterized protein OS=Sus scrofa OX=9823 GN=TANC2 PE=4 SV=1	tr|A0A287B2G1|A0A287B2G1_PIG	0	0.373901
Uncharacterized protein OS=Sus scrofa OX=9823 GN=BORCS7 PE=4 SV=1	tr|A0A287B4Y0|A0A287B4Y0_PIG	0	0.373901
Uncharacterized protein OS=Sus scrofa OX=9823 GN=YTHDF3 PE=1 SV=1	tr|A0A287B6U9|A0A287B6U9_PIG	0	0.373901
Nucleoporin 58 OS=Sus scrofa OX=9823 GN=NUP58 PE=4 SV=1	tr|A0A287B8D6|A0A287B8D6_PIG (+1)	0	0.373901
Uncharacterized protein OS=Sus scrofa OX=9823 GN=PYM1 PE=1 SV=1	tr|A0A287B9S4|A0A287B9S4_PIG	0	0.373901
Uncharacterized protein OS=Sus scrofa OX=9823 GN=LMTK2 PE=4 SV=1	tr|A0A287BC41|A0A287BC41_PIG (+1)	0	0.373901
von Willebrand factor A domain-containing protein 1 isoform 1 OS=Sus scrofa OX=9823 GN=VWA1 PE=1 SV=1	tr|A0A287BKP9|A0A287BKP9_PIG (+1)	0	0.373901
Uncharacterized protein OS=Sus scrofa OX=9823 GN=TNS3 PE=1 SV=1	tr|A0A287BQG7|A0A287BQG7_PIG (+1)	0	0.373901
Uncharacterized protein OS=Sus scrofa OX=9823 GN=ZBP1 PE=1 SV=1	tr|A0A288CFW7|A0A288CFW7_PIG	0	0.373901
Uncharacterized protein OS=Sus scrofa OX=9823 GN=DAGLA PE=4 SV=2	tr|F1RKR2|F1RKR2_PIG	0	0.373901
N(4)-(Beta-N-acetylglucosaminyl)-L-asparaginase OS=Sus scrofa OX=9823 GN=AGA PE=1 SV=2	tr|F1RT17|F1RT17_PIG	0	0.373901
Uncharacterized protein OS=Sus scrofa OX=9823 GN=TCEAL3 PE=1 SV=1	tr|F1RYC9|F1RYC9_PIG	0	0.373901
Uncharacterized protein OS=Sus scrofa OX=9823 GN=NUMB PE=1 SV=3	tr|F1S3J6|F1S3J6_PIG	0	0.373901
Uncharacterized protein OS=Sus scrofa OX=9823 GN=TRIM33 PE=4 SV=3	tr|F1SBR8|F1SBR8_PIG (+2)	0	0.373901
Uncharacterized protein OS=Sus scrofa OX=9823 GN=SF3B4 PE=1 SV=1	tr|F1SDG0|F1SDG0_PIG	0	0.373901
Uncharacterized protein OS=Sus scrofa OX=9823 GN=APBA1 PE=1 SV=3	tr|F1SJD2|F1SJD2_PIG (+1)	0	0.373901
Protein phosphatase 1 regulatory subunit 29 OS=Sus scrofa OX=9823 GN=ELFN2 PE=1 SV=1	tr|F1SKL4|F1SKL4_PIG	0	0.373901
Cadherin-10 isoform X1 OS=Sus scrofa OX=9823 GN=CDH10 PE=4 SV=1	tr|F1SRL4|F1SRL4_PIG	0	0.373901
Complement C1q-like protein 3 OS=Sus scrofa OX=9823 GN=C1QL3 PE=4 SV=1	tr|F2Z5D5|F2Z5D5_PIG	0	0.373901
Uncharacterized protein OS=Sus scrofa OX=9823 GN=TIAL1 PE=1 SV=3	tr|F2Z5F9|F2Z5F9_PIG	0	0.373901
WAS/WASL-interacting protein family member 1 OS=Sus scrofa OX=9823 GN=WIPF1 PE=1 SV=2	tr|I3L5A6|I3L5A6_PIG	0	0.373901
Nucleoporin NUP53 OS=Sus scrofa OX=9823 GN=NUP35 PE=3 SV=2	tr|I3LCW0|I3LCW0_PIG	0	0.373901
Protein FAM171B OS=Sus scrofa OX=9823 GN=FAM171B PE=4 SV=2	tr|I3LET1|I3LET1_PIG	0	0.373901
Uncharacterized protein OS=Sus scrofa OX=9823 GN=R3HDM2 PE=4 SV=2	tr|I3LIQ0|I3LIQ0_PIG	0	0.373901
Leucine zipper protein 1 OS=Sus scrofa OX=9823 GN=LUZP1 PE=4 SV=1	tr|I3LNF8|I3LNF8_PIG	0	0.373901
Nuclear autoantigenic sperm protein isoform 2 OS=Sus scrofa OX=9823 GN=NASP PE=1 SV=2	tr|I3LRP1|I3LRP1_PIG	0	0.373901
Uncharacterized protein OS=Sus scrofa OX=9823 GN=ABCB7 PE=1 SV=2	tr|K7GM11|K7GM11_PIG	0	0.373901
Growth arrest-specific protein 7 isoform c OS=Sus scrofa OX=9823 GN=GAS7 PE=2 SV=1	tr|K9J6K5|K9J6K5_PIG	0	0.373901
Proteasome subunit beta type-7 OS=Sus scrofa OX=9823 GN=PSMB7 PE=2 SV=2	sp|A1XQU1|PSB7_PIG	0	0.373901
Ribose-5-phosphate isomerase OS=Sus scrofa OX=9823 GN=RPIA PE=2 SV=1	sp|A2TLM1|RPIA_PIG (+1)	0	0.373901
Adenylosuccinate synthetase isozyme 2 OS=Sus scrofa OX=9823 GN=ADSS PE=2 SV=1	sp|A4Z6H1|PURA2_PIG	#DIV/0!	0.373901
Protein canopy homolog 3 OS=Sus scrofa OX=9823 GN=CNPY3 PE=3 SV=1	sp|A5GFQ5|CNPY3_PIG	0	0.373901
Dolichol-phosphate mannosyltransferase subunit 1 OS=Sus scrofa OX=9823 GN=DPM1 PE=3 SV=1	sp|A5GFZ5|DPM1_PIG (+1)	#DIV/0!	0.373901
Phosphoacetylglucosamine mutase OS=Sus scrofa OX=9823 GN=PGM3 PE=1 SV=2	sp|F1RQM2|AGM1_PIG (+1)	0	0.373901
Calcium-activated potassium channel subunit alpha-1 (Fragment) OS=Sus scrofa OX=9823 GN=KCNMA1 PE=2 SV=2	sp|O18866|KCMA1_PIG (+5)	#DIV/0!	0.373901
Disintegrin and metalloproteinase domain-containing protein 10 OS=Sus scrofa OX=9823 GN=ADAM10 PE=2 SV=2	sp|O77633|ADA10_PIG (+1)	#DIV/0!	0.373901
Coagulation factor XII OS=Sus scrofa OX=9823 GN=F12 PE=2 SV=1	sp|O97507|FA12_PIG (+2)	#DIV/0!	0.373901
Fructose-1,6-bisphosphatase 1 OS=Sus scrofa OX=9823 GN=FBP1 PE=1 SV=4	sp|P00636|F16P1_PIG (+1)	0	0.373901
Proenkephalin-B OS=Sus scrofa OX=9823 GN=PDYN PE=1 SV=1	sp|P01214|PDYN_PIG	0	0.373901
Desmin OS=Sus scrofa OX=9823 GN=DES PE=1 SV=4	sp|P02540|DESM_PIG	0	0.373901
Neurofilament light polypeptide OS=Sus scrofa OX=9823 GN=NEFL PE=1 SV=3	sp|P02547|NFL_PIG	0	0.373901
NADPH--cytochrome P450 reductase OS=Sus scrofa OX=9823 GN=POR PE=1 SV=2	sp|P04175|NCPR_PIG (+3)	#DIV/0!	0.373901
Annexin A4 OS=Sus scrofa OX=9823 GN=ANXA4 PE=1 SV=2	sp|P08132|ANXA4_PIG (+2)	0	0.373901
Mannose-1-phosphate guanyltransferase beta OS=Sus scrofa OX=9823 GN=GMPPB PE=1 SV=1	sp|P0C5I2|GMPPB_PIG (+1)	#DIV/0!	0.373901
Coagulation factor IX (Fragment) OS=Sus scrofa OX=9823 GN=F9 PE=1 SV=2	sp|P16293|FA9_PIG (+1)	#DIV/0!	0.373901
Ferritin light chain (Fragment) OS=Sus scrofa OX=9823 GN=FTL PE=1 SV=1	sp|P19133|FRIL_PIG	0	0.373901
Calcitonin receptor OS=Sus scrofa OX=9823 GN=CALCR PE=2 SV=2	sp|P25117|CALCR_PIG	0	0.373901
Myosin regulatory light polypeptide 9 OS=Sus scrofa OX=9823 GN=MYL9 PE=1 SV=2	sp|P29269|MYL9_PIG	0	0.373901
DNA-directed RNA polymerase II subunit RPB9 OS=Sus scrofa OX=9823 GN=POLR2I PE=1 SV=1	sp|P60899|RPB9_PIG	0	0.373901
Casein kinase II subunit beta OS=Sus scrofa OX=9823 GN=CSNK2B PE=2 SV=1	sp|P67872|CSK2B_PIG (+1)	#DIV/0!	0.373901
Microsomal glutathione S-transferase 1 OS=Sus scrofa OX=9823 GN=MGST1 PE=2 SV=3	sp|P79382|MGST1_PIG	#DIV/0!	0.373901
Apolipoprotein R OS=Sus scrofa OX=9823 GN=APOR PE=1 SV=1	sp|Q03472|APOR_PIG	0	0.373901
Regucalcin OS=Sus scrofa OX=9823 GN=RGN PE=2 SV=1	sp|Q06AA3|RGN_PIG	0	0.373901
Ubiquitin carboxyl-terminal hydrolase isozyme L5 OS=Sus scrofa OX=9823 GN=UCHL5 PE=2 SV=1	sp|Q06AT3|UCHL5_PIG (+1)	#DIV/0!	0.373901
Calponin-1 OS=Sus scrofa OX=9823 GN=CNN1 PE=2 SV=1	sp|Q08092|CNN1_PIG	0	0.373901
Calponin-2 (Fragment) OS=Sus scrofa OX=9823 GN=CNN2 PE=2 SV=1	sp|Q08094|CNN2_PIG (+1)	0	0.373901
Cystathionine gamma-lyase OS=Sus scrofa OX=9823 GN=CTH PE=2 SV=1	sp|Q19QT7|CGL_PIG	0	0.373901
Zinc finger Ran-binding domain-containing protein 2 OS=Sus scrofa OX=9823 GN=ZRANB2 PE=2 SV=1	sp|Q19QU3|ZRAB2_PIG	0	0.373901
Signal transducer and activator of transcription 3 OS=Sus scrofa OX=9823 GN=STAT3 PE=1 SV=1	sp|Q19S50|STAT3_PIG (+3)	0	0.373901
Unconventional myosin-VI OS=Sus scrofa OX=9823 GN=MYO6 PE=1 SV=1	sp|Q29122|MYO6_PIG	#DIV/0!	0.373901
Palmdelphin OS=Sus scrofa OX=9823 GN=PALMD PE=2 SV=1	sp|Q2MJV9|PALMD_PIG (+2)	0	0.373901
Serine/threonine-protein kinase WNK1 OS=Sus scrofa OX=9823 GN=WNK1 PE=2 SV=3	sp|Q6R2V0|WNK1_PIG	#DIV/0!	0.373901
Optineurin OS=Sus scrofa OX=9823 GN=OPTN PE=1 SV=1	sp|Q7YS99|OPTN_PIG (+1)	0	0.373901
Dehydrogenase/reductase SDR family member 4 OS=Sus scrofa OX=9823 GN=DHRS4 PE=1 SV=2	sp|Q8WNV7|DHRS4_PIG (+1)	#DIV/0!	0.373901
Corticosteroid-binding globulin OS=Sus scrofa OX=9823 GN=Serpina6 PE=2 SV=1	sp|Q9GK37|CBG_PIG (+1)	#DIV/0!	0.373901
Decorin OS=Sus scrofa OX=9823 GN=DCN PE=2 SV=1	sp|Q9XSD9|PGS2_PIG	0	0.373901
Estradiol 17-beta-dehydrogenase 8 OS=Sus scrofa OX=9823 GN=HSD17B8 PE=3 SV=2	sp|Q9XT00|DHB8_PIG (+1)	0	0.373901
Uncharacterized protein OS=Sus scrofa OX=9823 PE=4 SV=6	tr|A0A075B7H9|A0A075B7H9_PIG (+1)	#DIV/0!	0.373901
Uncharacterized protein OS=Sus scrofa OX=9823 PE=1 SV=6	tr|A0A075B7J0|A0A075B7J0_PIG	#DIV/0!	0.373901
Uncharacterized protein OS=Sus scrofa OX=9823 GN=HSPG2 PE=1 SV=1	tr|A0A286ZHV7|A0A286ZHV7_PIG (+1)	0	0.373901
E3 ubiquitin-protein ligase TRIM36 isoform X2 OS=Sus scrofa OX=9823 GN=TRIM36 PE=1 SV=1	tr|A0A286ZIC5|A0A286ZIC5_PIG (+3)	#DIV/0!	0.373901
Uncharacterized protein OS=Sus scrofa OX=9823 GN=PCLO PE=1 SV=1	tr|A0A286ZIF5|A0A286ZIF5_PIG	0	0.373901
Uncharacterized protein OS=Sus scrofa OX=9823 GN=INF2 PE=4 SV=1	tr|A0A286ZIR1|A0A286ZIR1_PIG (+1)	0	0.373901
Calcium-binding mitochondrial carrier protein SCaMC-3 OS=Sus scrofa OX=9823 GN=SLC25A23 PE=3 SV=1	tr|A0A286ZIW7|A0A286ZIW7_PIG (+3)	#DIV/0!	0.373901
Uncharacterized protein OS=Sus scrofa OX=9823 GN=TPR PE=1 SV=1	tr|A0A286ZJ74|A0A286ZJ74_PIG (+1)	0	0.373901
Uncharacterized protein OS=Sus scrofa OX=9823 GN=RGS14 PE=4 SV=1	tr|A0A286ZJC5|A0A286ZJC5_PIG	0	0.373901
MAP7 domain-containing protein 1 isoform 3 OS=Sus scrofa OX=9823 GN=MAP7D1 PE=1 SV=1	tr|A0A286ZJM7|A0A286ZJM7_PIG (+1)	0	0.373901
Regulator of microtubule dynamics protein 1 isoform X2 OS=Sus scrofa OX=9823 GN=RMDN1 PE=1 SV=1	tr|A0A286ZK35|A0A286ZK35_PIG (+2)	#DIV/0!	0.373901
Uncharacterized protein OS=Sus scrofa OX=9823 PE=4 SV=1	tr|A0A286ZK97|A0A286ZK97_PIG (+2)	#DIV/0!	0.373901
Uncharacterized protein OS=Sus scrofa OX=9823 GN=C1QB PE=1 SV=1	tr|A0A286ZKA5|A0A286ZKA5_PIG	#DIV/0!	0.373901
Coiled-coil domain-containing protein 91 isoform 1 OS=Sus scrofa OX=9823 GN=CCDC91 PE=4 SV=1	tr|A0A286ZKC4|A0A286ZKC4_PIG	0	0.373901
Uncharacterized protein OS=Sus scrofa OX=9823 GN=TRHDE PE=4 SV=1	tr|A0A286ZKD2|A0A286ZKD2_PIG (+2)	#DIV/0!	0.373901
Uncharacterized protein OS=Sus scrofa OX=9823 GN=SLC25A13 PE=1 SV=1	tr|A0A286ZKD4|A0A286ZKD4_PIG	#DIV/0!	0.373901
Uncharacterized protein OS=Sus scrofa OX=9823 GN=DPYSL2 PE=1 SV=1	tr|A0A286ZKK0|A0A286ZKK0_PIG	0	0.373901
Diacylglycerol kinase OS=Sus scrofa OX=9823 GN=DGKE PE=1 SV=1	tr|A0A286ZKN9|A0A286ZKN9_PIG (+1)	#DIV/0!	0.373901
Polypyrimidine tract-binding protein 1 OS=Sus scrofa OX=9823 GN=PTBP1 PE=1 SV=1	tr|A0A286ZKQ3|A0A286ZKQ3_PIG (+1)	#DIV/0!	0.373901
Uncharacterized protein OS=Sus scrofa OX=9823 GN=PKD1 PE=4 SV=1	tr|A0A286ZKR8|A0A286ZKR8_PIG (+1)	0	0.373901
Hepatocyte growth factor-regulated tyrosine kinase substrate OS=Sus scrofa OX=9823 GN=HGS PE=1 SV=1	tr|A0A286ZKS6|A0A286ZKS6_PIG	0	0.373901
Uncharacterized protein OS=Sus scrofa OX=9823 GN=CSPG5 PE=4 SV=1	tr|A0A286ZL05|A0A286ZL05_PIG	0	0.373901
E3 ubiquitin-protein ligase OS=Sus scrofa OX=9823 GN=ITCH PE=4 SV=1	tr|A0A286ZL14|A0A286ZL14_PIG (+2)	#DIV/0!	0.373901
Uncharacterized protein OS=Sus scrofa OX=9823 GN=ANP32E PE=1 SV=1	tr|A0A286ZL69|A0A286ZL69_PIG (+1)	0	0.373901
Glycolipid transfer protein OS=Sus scrofa OX=9823 GN=GLTP PE=1 SV=1	tr|A0A286ZLH2|A0A286ZLH2_PIG	#DIV/0!	0.373901
Uncharacterized protein OS=Sus scrofa OX=9823 GN=AVL9 PE=4 SV=1	tr|A0A286ZLH6|A0A286ZLH6_PIG (+1)	#DIV/0!	0.373901
Uncharacterized protein OS=Sus scrofa OX=9823 GN=PEX14 PE=1 SV=1	tr|A0A286ZLS4|A0A286ZLS4_PIG (+1)	0	0.373901
Threonine synthase like 1 OS=Sus scrofa OX=9823 GN=THNSL1 PE=1 SV=1	tr|A0A286ZLV3|A0A286ZLV3_PIG (+2)	#DIV/0!	0.373901
Uncharacterized protein OS=Sus scrofa OX=9823 GN=ACBD5 PE=1 SV=1	tr|A0A286ZLW3|A0A286ZLW3_PIG (+1)	0	0.373901
Uncharacterized protein OS=Sus scrofa OX=9823 GN=FNBP1L PE=1 SV=1	tr|A0A286ZMC2|A0A286ZMC2_PIG (+3)	0	0.373901
Uncharacterized protein OS=Sus scrofa OX=9823 GN=TCAF1 PE=1 SV=1	tr|A0A286ZMY3|A0A286ZMY3_PIG (+3)	#DIV/0!	0.373901
FAS-associated factor 2 isoform X1 OS=Sus scrofa OX=9823 GN=FAF2 PE=1 SV=1	tr|A0A286ZMY6|A0A286ZMY6_PIG (+1)	#DIV/0!	0.373901
Uncharacterized protein OS=Sus scrofa OX=9823 GN=POSTN PE=1 SV=1	tr|A0A286ZN21|A0A286ZN21_PIG (+3)	0	0.373901
Uncharacterized protein OS=Sus scrofa OX=9823 GN=EPHA3 PE=3 SV=1	tr|A0A286ZNB6|A0A286ZNB6_PIG (+2)	#DIV/0!	0.373901
Uncharacterized protein OS=Sus scrofa OX=9823 GN=CAVIN1 PE=4 SV=1	tr|A0A286ZNI3|A0A286ZNI3_PIG (+1)	0	0.373901
Urea transporter OS=Sus scrofa OX=9823 GN=SLC14A1 PE=3 SV=1	tr|A0A286ZNL5|A0A286ZNL5_PIG (+4)	#DIV/0!	0.373901
Uncharacterized protein OS=Sus scrofa OX=9823 GN=ITGAM PE=1 SV=1	tr|A0A286ZNN7|A0A286ZNN7_PIG (+1)	0	0.373901
Uncharacterized protein OS=Sus scrofa OX=9823 GN=HYDIN PE=4 SV=1	tr|A0A286ZP34|A0A286ZP34_PIG	#DIV/0!	0.373901
Leucine-rich repeat flightless-interacting protein 1 isoform X3 OS=Sus scrofa OX=9823 GN=LRRFIP1 PE=1 SV=1	tr|A0A286ZP61|A0A286ZP61_PIG	0	0.373901
Uncharacterized protein OS=Sus scrofa OX=9823 GN=MRPL40 PE=1 SV=1	tr|A0A286ZP98|A0A286ZP98_PIG	0	0.373901
Uncharacterized protein OS=Sus scrofa OX=9823 PE=4 SV=1	tr|A0A286ZPC5|A0A286ZPC5_PIG (+2)	#DIV/0!	0.373901
Peptide-N(4)-(N-acetyl-beta-glucosaminyl)asparagine amidase isoform 4 OS=Sus scrofa OX=9823 GN=NGLY1 PE=1 SV=1	tr|A0A286ZPH3|A0A286ZPH3_PIG (+2)	#DIV/0!	0.373901
Uncharacterized protein OS=Sus scrofa OX=9823 GN=STRN3 PE=1 SV=1	tr|A0A286ZPW3|A0A286ZPW3_PIG (+3)	#DIV/0!	0.373901
Uncharacterized protein OS=Sus scrofa OX=9823 GN=EML1 PE=1 SV=1	tr|A0A286ZQ14|A0A286ZQ14_PIG (+5)	#DIV/0!	0.373901
40S ribosomal protein S26 OS=Sus scrofa OX=9823 GN=RPS26 PE=1 SV=1	tr|A0A286ZQ40|A0A286ZQ40_PIG (+1)	#DIV/0!	0.373901
Uncharacterized protein OS=Sus scrofa OX=9823 GN=OGFR PE=4 SV=1	tr|A0A286ZQ96|A0A286ZQ96_PIG (+2)	0	0.373901
Uncharacterized protein OS=Sus scrofa OX=9823 GN=FAM98A PE=1 SV=1	tr|A0A286ZQF3|A0A286ZQF3_PIG	#DIV/0!	0.373901
Uncharacterized protein OS=Sus scrofa OX=9823 GN=MYEF2 PE=1 SV=1	tr|A0A286ZQH1|A0A286ZQH1_PIG (+3)	0	0.373901
Uncharacterized protein OS=Sus scrofa OX=9823 GN=LOC110258310 PE=4 SV=1	tr|A0A286ZQJ9|A0A286ZQJ9_PIG	#DIV/0!	0.373901
Uncharacterized protein OS=Sus scrofa OX=9823 GN=SCFD1 PE=1 SV=1	tr|A0A286ZQS7|A0A286ZQS7_PIG (+1)	#DIV/0!	0.373901
Uncharacterized protein OS=Sus scrofa OX=9823 GN=UFD1 PE=1 SV=1	tr|A0A286ZRI2|A0A286ZRI2_PIG (+2)	#DIV/0!	0.373901
Uncharacterized protein OS=Sus scrofa OX=9823 GN=WASHC5 PE=1 SV=1	tr|A0A286ZRN4|A0A286ZRN4_PIG (+3)	#DIV/0!	0.373901
Uncharacterized protein OS=Sus scrofa OX=9823 GN=PMPCA PE=1 SV=1	tr|A0A286ZRT5|A0A286ZRT5_PIG (+2)	#DIV/0!	0.373901
ATP synthase subunit s, mitochondrial isoform X1 OS=Sus scrofa OX=9823 GN=DMAC2L PE=1 SV=1	tr|A0A286ZRY7|A0A286ZRY7_PIG	#DIV/0!	0.373901
Tyrosine-protein phosphatase non-receptor type 23 isoform 1 OS=Sus scrofa OX=9823 GN=PTPN23 PE=1 SV=1	tr|A0A286ZS66|A0A286ZS66_PIG (+2)	#DIV/0!	0.373901
Nicastrin isoform 1 OS=Sus scrofa OX=9823 GN=NCSTN PE=1 SV=1	tr|A0A286ZSI3|A0A286ZSI3_PIG	0	0.373901
Uncharacterized protein OS=Sus scrofa OX=9823 GN=THSD7A PE=4 SV=1	tr|A0A286ZT45|A0A286ZT45_PIG (+3)	0	0.373901
Uncharacterized protein OS=Sus scrofa OX=9823 GN=NECAB2 PE=4 SV=1	tr|A0A286ZTK3|A0A286ZTK3_PIG	0	0.373901
Uncharacterized protein OS=Sus scrofa OX=9823 GN=SIK3 PE=1 SV=1	tr|A0A286ZTQ6|A0A286ZTQ6_PIG (+2)	#DIV/0!	0.373901
Uncharacterized protein OS=Sus scrofa OX=9823 GN=LOC106504547 PE=1 SV=1	tr|A0A286ZTU7|A0A286ZTU7_PIG (+3)	#DIV/0!	0.373901
Uncharacterized protein OS=Sus scrofa OX=9823 GN=WDR77 PE=1 SV=1	tr|A0A286ZU25|A0A286ZU25_PIG (+1)	#DIV/0!	0.373901
Uncharacterized protein OS=Sus scrofa OX=9823 GN=TSTA3 PE=1 SV=1	tr|A0A286ZUK6|A0A286ZUK6_PIG (+1)	#DIV/0!	0.373901
Uncharacterized protein OS=Sus scrofa OX=9823 GN=PPP1R16A PE=1 SV=1	tr|A0A286ZUK9|A0A286ZUK9_PIG	0	0.373901
F-box/LRR-repeat protein 15 isoform X1 OS=Sus scrofa OX=9823 GN=FBXL15 PE=4 SV=1	tr|A0A286ZUQ7|A0A286ZUQ7_PIG (+1)	0	0.373901
Protein transport protein sec16 OS=Sus scrofa OX=9823 GN=SEC16A PE=1 SV=1	tr|A0A286ZV83|A0A286ZV83_PIG (+2)	0	0.373901
Uncharacterized protein OS=Sus scrofa OX=9823 GN=AZGP1 PE=1 SV=1	tr|A0A286ZVC3|A0A286ZVC3_PIG (+2)	#DIV/0!	0.373901
Splicing factor 3B subunit 3 OS=Sus scrofa OX=9823 GN=SF3B3 PE=1 SV=1	tr|A0A286ZVS0|A0A286ZVS0_PIG	#DIV/0!	0.373901
Eukaryotic translation elongation factor 1 epsilon-1 isoform 1 OS=Sus scrofa OX=9823 GN=EEF1E1 PE=1 SV=1	tr|A0A286ZWJ2|A0A286ZWJ2_PIG	#DIV/0!	0.373901
Uncharacterized protein OS=Sus scrofa OX=9823 GN=TACC1 PE=4 SV=1	tr|A0A286ZWP4|A0A286ZWP4_PIG (+1)	0	0.373901
Keratin-like protein KRT222 OS=Sus scrofa OX=9823 GN=KRT222 PE=1 SV=1	tr|A0A286ZXJ0|A0A286ZXJ0_PIG (+1)	#DIV/0!	0.373901
Uncharacterized protein OS=Sus scrofa OX=9823 GN=ATL3 PE=1 SV=1	tr|A0A286ZXQ0|A0A286ZXQ0_PIG	#DIV/0!	0.373901
Uncharacterized protein OS=Sus scrofa OX=9823 GN=LOC100626015 PE=1 SV=1	tr|A0A286ZXQ5|A0A286ZXQ5_PIG (+5)	#DIV/0!	0.373901
GMP synthase glutamine-hydrolyzing OS=Sus scrofa OX=9823 GN=GMPS PE=1 SV=1	tr|A0A286ZY37|A0A286ZY37_PIG (+1)	#DIV/0!	0.373901
Uncharacterized protein OS=Sus scrofa OX=9823 PE=4 SV=1	tr|A0A286ZYL5|A0A286ZYL5_PIG (+1)	#DIV/0!	0.373901
Uncharacterized protein OS=Sus scrofa OX=9823 GN=PCYT1B PE=1 SV=1	tr|A0A286ZYT9|A0A286ZYT9_PIG (+2)	0	0.373901
10-formyltetrahydrofolate dehydrogenase OS=Sus scrofa OX=9823 GN=ALDH1L1 PE=1 SV=1	tr|A0A286ZYU8|A0A286ZYU8_PIG (+1)	#DIV/0!	0.373901
Uncharacterized protein OS=Sus scrofa OX=9823 GN=AGPAT4 PE=4 SV=1	tr|A0A286ZZ00|A0A286ZZ00_PIG (+1)	#DIV/0!	0.373901
Oxysterol-binding protein OS=Sus scrofa OX=9823 GN=OSBPL8 PE=1 SV=1	tr|A0A286ZZB4|A0A286ZZB4_PIG (+2)	#DIV/0!	0.373901
Methylthioribulose-1-phosphate dehydratase OS=Sus scrofa OX=9823 GN=APIP PE=1 SV=1	tr|A0A286ZZL6|A0A286ZZL6_PIG (+3)	0	0.373901
Sorting nexin-6 isoform X1 OS=Sus scrofa OX=9823 GN=SNX6 PE=1 SV=1	tr|A0A286ZZQ0|A0A286ZZQ0_PIG (+1)	0	0.373901
Uncharacterized protein OS=Sus scrofa OX=9823 GN=CDR2L PE=4 SV=1	tr|A0A286ZZQ7|A0A286ZZQ7_PIG (+2)	0	0.373901
Diacylglycerol kinase OS=Sus scrofa OX=9823 GN=DGKB PE=3 SV=1	tr|A0A287A025|A0A287A025_PIG (+3)	#DIV/0!	0.373901
Protein arginine N-methyltransferase 5 OS=Sus scrofa OX=9823 GN=PRMT5 PE=1 SV=1	tr|A0A287A026|A0A287A026_PIG (+3)	0	0.373901
Netrin-G1 isoform X1 OS=Sus scrofa OX=9823 GN=NTNG1 PE=1 SV=1	tr|A0A287A074|A0A287A074_PIG (+3)	#DIV/0!	0.373901
MMS19 nucleotide excision repair protein homolog isoform X2 OS=Sus scrofa OX=9823 GN=MMS19 PE=1 SV=1	tr|A0A287A0G6|A0A287A0G6_PIG (+1)	#DIV/0!	0.373901
Uncharacterized protein OS=Sus scrofa OX=9823 GN=MICU3 PE=1 SV=1	tr|A0A287A0K7|A0A287A0K7_PIG (+1)	#DIV/0!	0.373901
Uncharacterized protein OS=Sus scrofa OX=9823 GN=EXOC3 PE=4 SV=1	tr|A0A287A164|A0A287A164_PIG	#DIV/0!	0.373901
Uncharacterized protein OS=Sus scrofa OX=9823 GN=LMO7 PE=1 SV=1	tr|A0A287A1Q6|A0A287A1Q6_PIG	0	0.373901
Uncharacterized protein OS=Sus scrofa OX=9823 GN=SEPT5 PE=1 SV=1	tr|A0A287A1T3|A0A287A1T3_PIG	#DIV/0!	0.373901
Uncharacterized protein OS=Sus scrofa OX=9823 GN=TAPBP PE=1 SV=1	tr|A0A287A1Y1|A0A287A1Y1_PIG	0	0.373901
Glycogen [starch] synthase OS=Sus scrofa OX=9823 GN=GYS1 PE=1 SV=1	tr|A0A287A291|A0A287A291_PIG	#DIV/0!	0.373901
Uncharacterized protein OS=Sus scrofa OX=9823 GN=CROCC2 PE=4 SV=1	tr|A0A287A2P1|A0A287A2P1_PIG	#DIV/0!	0.373901
Uncharacterized protein OS=Sus scrofa OX=9823 GN=DMWD PE=4 SV=1	tr|A0A287A353|A0A287A353_PIG	#DIV/0!	0.373901
Uncharacterized protein OS=Sus scrofa OX=9823 GN=ARFIP1 PE=1 SV=1	tr|A0A287A3C5|A0A287A3C5_PIG (+1)	0	0.373901
BLOC-1 related complex subunit 5 OS=Sus scrofa OX=9823 GN=BORCS5 PE=1 SV=1	tr|A0A287A4F7|A0A287A4F7_PIG (+1)	0	0.373901
Uncharacterized protein OS=Sus scrofa OX=9823 GN=MTSS1 PE=4 SV=1	tr|A0A287A522|A0A287A522_PIG (+4)	0	0.373901
Calcium-binding and coiled-coil domain-containing protein 1 isoform X1 OS=Sus scrofa OX=9823 GN=CALCOCO1 PE=1 SV=1	tr|A0A287A5M8|A0A287A5M8_PIG (+1)	#DIV/0!	0.373901
Uncharacterized protein OS=Sus scrofa OX=9823 GN=SPECC1 PE=4 SV=1	tr|A0A287A5Q4|A0A287A5Q4_PIG (+3)	0	0.373901
Uncharacterized protein OS=Sus scrofa OX=9823 GN=ABHD14B PE=1 SV=1	tr|A0A287A5T1|A0A287A5T1_PIG	#DIV/0!	0.373901
Amyloid-like protein 2 isoform 1 OS=Sus scrofa OX=9823 GN=APLP2 PE=1 SV=1	tr|A0A287A5V7|A0A287A5V7_PIG	0	0.373901
Uncharacterized protein OS=Sus scrofa OX=9823 GN=LOC100517145 PE=1 SV=1	tr|A0A287A5Z8|A0A287A5Z8_PIG (+3)	#DIV/0!	0.373901
Uncharacterized protein OS=Sus scrofa OX=9823 GN=PPA2 PE=1 SV=1	tr|A0A287A6I6|A0A287A6I6_PIG (+2)	#DIV/0!	0.373901
Uncharacterized protein OS=Sus scrofa OX=9823 GN=HBS1L PE=1 SV=1	tr|A0A287A6I9|A0A287A6I9_PIG (+3)	#DIV/0!	0.373901
Carboxymethylenebutenolidase homolog OS=Sus scrofa OX=9823 GN=CMBL PE=1 SV=1	tr|A0A287A6V9|A0A287A6V9_PIG	0	0.373901
Histone-lysine N-methyltransferase OS=Sus scrofa OX=9823 GN=KMT2C PE=4 SV=1	tr|A0A287A6Z4|A0A287A6Z4_PIG (+5)	#DIV/0!	0.373901
Uncharacterized protein OS=Sus scrofa OX=9823 GN=ITFG1 PE=4 SV=1	tr|A0A287A704|A0A287A704_PIG	0	0.373901
Ribokinase OS=Sus scrofa OX=9823 GN=RBKS PE=1 SV=1	tr|A0A287A7K4|A0A287A7K4_PIG	0	0.373901
Uncharacterized protein OS=Sus scrofa OX=9823 GN=CLIP1 PE=1 SV=1	tr|A0A287A7X6|A0A287A7X6_PIG (+1)	0	0.373901
Pyroglutamyl-peptidase 1 isoform 1 OS=Sus scrofa OX=9823 GN=PGPEP1 PE=4 SV=1	tr|A0A287A7X7|A0A287A7X7_PIG	0	0.373901
Short-chain specific acyl-CoA dehydrogenase, mitochondrial isoform 1 OS=Sus scrofa OX=9823 GN=ACADS PE=1 SV=1	tr|A0A287A8Y8|A0A287A8Y8_PIG (+2)	#DIV/0!	0.373901
Myosin light chain kinase, smooth muscle OS=Sus scrofa OX=9823 GN=MYLK PE=1 SV=1	tr|A0A287A9P3|A0A287A9P3_PIG (+1)	0	0.373901
Vacuolar protein-sorting-associated protein 25 OS=Sus scrofa OX=9823 GN=VPS25 PE=1 SV=1	tr|A0A287AAM6|A0A287AAM6_PIG	#DIV/0!	0.373901
Uncharacterized protein OS=Sus scrofa OX=9823 GN=SHTN1 PE=1 SV=1	tr|A0A287AB42|A0A287AB42_PIG	0	0.373901
Uncharacterized protein OS=Sus scrofa OX=9823 GN=CCDC88A PE=1 SV=1	tr|A0A287AB98|A0A287AB98_PIG (+4)	#DIV/0!	0.373901
Non-specific serine/threonine protein kinase OS=Sus scrofa OX=9823 GN=MARK2 PE=4 SV=1	tr|A0A287ACD4|A0A287ACD4_PIG (+2)	#DIV/0!	0.373901
Peroxisomal bifunctional enzyme isoform 1 OS=Sus scrofa OX=9823 GN=EHHADH PE=1 SV=1	tr|A0A287ACP9|A0A287ACP9_PIG	#DIV/0!	0.373901
Uncharacterized protein OS=Sus scrofa OX=9823 GN=SEZ6 PE=4 SV=1	tr|A0A287ADC4|A0A287ADC4_PIG (+1)	0	0.373901
Phosphoinositide phospholipase C OS=Sus scrofa OX=9823 GN=PLCH2 PE=1 SV=1	tr|A0A287ADQ6|A0A287ADQ6_PIG (+2)	#DIV/0!	0.373901
Uncharacterized protein OS=Sus scrofa OX=9823 GN=CD5L PE=1 SV=1	tr|A0A287AE58|A0A287AE58_PIG (+1)	#DIV/0!	0.373901
Protein Red OS=Sus scrofa OX=9823 GN=IK PE=1 SV=1	tr|A0A287AED4|A0A287AED4_PIG (+2)	0	0.373901
Importin subunit alpha OS=Sus scrofa OX=9823 GN=KPNA6 PE=1 SV=1	tr|A0A287AEI6|A0A287AEI6_PIG	0	0.373901
Glutamyl-tRNA(Gln) amidotransferase subunit C, mitochondrial OS=Sus scrofa OX=9823 GN=GATC PE=1 SV=1	tr|A0A287AF99|A0A287AF99_PIG	0	0.373901
Uncharacterized protein OS=Sus scrofa OX=9823 PE=1 SV=1	tr|A0A287AFA5|A0A287AFA5_PIG	0	0.373901
Uncharacterized protein OS=Sus scrofa OX=9823 GN=FAM114A1 PE=1 SV=1	tr|A0A287AFB8|A0A287AFB8_PIG (+2)	0	0.373901
Uncharacterized protein OS=Sus scrofa OX=9823 GN=PTK2B PE=3 SV=1	tr|A0A287AFD2|A0A287AFD2_PIG (+2)	#DIV/0!	0.373901
Non-specific serine/threonine protein kinase OS=Sus scrofa OX=9823 GN=STK38L PE=4 SV=1	tr|A0A287AFN8|A0A287AFN8_PIG (+2)	#DIV/0!	0.373901
Uncharacterized protein OS=Sus scrofa OX=9823 GN=NPEPL1 PE=1 SV=1	tr|A0A287AFW2|A0A287AFW2_PIG (+1)	0	0.373901
Uncharacterized protein OS=Sus scrofa OX=9823 GN=DAB2IP PE=1 SV=1	tr|A0A287AFX0|A0A287AFX0_PIG (+1)	#DIV/0!	0.373901
cAMP-dependent protein kinase type I-beta regulatory subunit OS=Sus scrofa OX=9823 GN=PRKAR1B PE=4 SV=1	tr|A0A287AFZ3|A0A287AFZ3_PIG	0	0.373901
Glucosamine-6-phosphate isomerase OS=Sus scrofa OX=9823 GN=GNPDA1 PE=1 SV=1	tr|A0A287AHC2|A0A287AHC2_PIG	#DIV/0!	0.373901
Uncharacterized protein OS=Sus scrofa OX=9823 GN=NUCB1 PE=1 SV=1	tr|A0A287AHD5|A0A287AHD5_PIG (+1)	0	0.373901
Uncharacterized protein OS=Sus scrofa OX=9823 GN=CNBP PE=1 SV=1	tr|A0A287AIM5|A0A287AIM5_PIG (+1)	0	0.373901
Uncharacterized protein OS=Sus scrofa OX=9823 GN=CNKSR2 PE=4 SV=1	tr|A0A287AJ55|A0A287AJ55_PIG (+2)	#DIV/0!	0.373901
Uncharacterized protein OS=Sus scrofa OX=9823 GN=MRPL39 PE=1 SV=1	tr|A0A287AJM3|A0A287AJM3_PIG (+4)	#DIV/0!	0.373901
D-aspartate oxidase OS=Sus scrofa OX=9823 GN=DDO PE=4 SV=1	tr|A0A287AJN4|A0A287AJN4_PIG (+1)	0	0.373901
Coactosin-like protein OS=Sus scrofa OX=9823 GN=COTL1 PE=1 SV=1	tr|A0A287AJU1|A0A287AJU1_PIG	0	0.373901
Uncharacterized protein OS=Sus scrofa OX=9823 GN=BSDC1 PE=1 SV=1	tr|A0A287AJV7|A0A287AJV7_PIG (+1)	0	0.373901
Ubiquitin thioesterase OTU1 isoform 1 OS=Sus scrofa OX=9823 GN=YOD1 PE=1 SV=1	tr|A0A287AKB2|A0A287AKB2_PIG (+1)	0	0.373901
Uncharacterized protein OS=Sus scrofa OX=9823 GN=MIA3 PE=1 SV=1	tr|A0A287AKP0|A0A287AKP0_PIG	0	0.373901
Eukaryotic translation initiation factor 2B subunit delta OS=Sus scrofa OX=9823 GN=EIF2B4 PE=3 SV=1	tr|A0A287AKW8|A0A287AKW8_PIG (+1)	#DIV/0!	0.373901
Uncharacterized protein OS=Sus scrofa OX=9823 GN=ELMO1 PE=1 SV=1	tr|A0A287AL26|A0A287AL26_PIG (+2)	#DIV/0!	0.373901
Tripeptidyl-peptidase 2 isoform X1 OS=Sus scrofa OX=9823 GN=TPP2 PE=1 SV=1	tr|A0A287AL38|A0A287AL38_PIG	#DIV/0!	0.373901
Uncharacterized protein OS=Sus scrofa OX=9823 GN=CCDC85A PE=4 SV=1	tr|A0A287ALS1|A0A287ALS1_PIG	0	0.373901
Uncharacterized protein OS=Sus scrofa OX=9823 GN=TPP1 PE=1 SV=1	tr|A0A287AM42|A0A287AM42_PIG (+2)	0	0.373901
Ras-related protein Rab-6A isoform X3 OS=Sus scrofa OX=9823 GN=RAB6A PE=1 SV=1	tr|A0A287AMK7|A0A287AMK7_PIG (+1)	#DIV/0!	0.373901
Uncharacterized protein OS=Sus scrofa OX=9823 GN=RABL6 PE=1 SV=1	tr|A0A287AMM5|A0A287AMM5_PIG (+1)	#DIV/0!	0.373901
Uncharacterized protein OS=Sus scrofa OX=9823 GN=MMP9 PE=3 SV=1	tr|A0A287AN90|A0A287AN90_PIG (+1)	0	0.373901
ELKS/Rab6-interacting/CAST family member 1 isoform X7 OS=Sus scrofa OX=9823 GN=ERC1 PE=1 SV=1	tr|A0A287ANH2|A0A287ANH2_PIG	#DIV/0!	0.373901
BAG family molecular chaperone regulator 4 isoform 1 OS=Sus scrofa OX=9823 GN=BAG4 PE=4 SV=1	tr|A0A287AP23|A0A287AP23_PIG	0	0.373901
Uncharacterized protein OS=Sus scrofa OX=9823 GN=SLK PE=1 SV=1	tr|A0A287APG0|A0A287APG0_PIG	0	0.373901
60S ribosomal protein L18a OS=Sus scrofa OX=9823 GN=RPL18A PE=1 SV=1	tr|A0A287APR1|A0A287APR1_PIG	#DIV/0!	0.373901
Adenylate cyclase OS=Sus scrofa OX=9823 GN=ADCY8 PE=3 SV=1	tr|A0A287AQR6|A0A287AQR6_PIG (+2)	#DIV/0!	0.373901
Uncharacterized protein OS=Sus scrofa OX=9823 GN=PAWR PE=4 SV=1	tr|A0A287ARB3|A0A287ARB3_PIG	0	0.373901
Eukaryotic translation initiation factor 3 subunit F OS=Sus scrofa OX=9823 GN=EIF3F PE=3 SV=1	tr|A0A287ARI1|A0A287ARI1_PIG	#DIV/0!	0.373901
COP9 signalosome subunit 7B OS=Sus scrofa OX=9823 GN=COPS7B PE=4 SV=1	tr|A0A287AS45|A0A287AS45_PIG	#DIV/0!	0.373901
Uncharacterized protein OS=Sus scrofa OX=9823 GN=NIF3L1 PE=1 SV=1	tr|A0A287ASH3|A0A287ASH3_PIG (+3)	0	0.373901
Kazrin isoform B OS=Sus scrofa OX=9823 GN=KAZN PE=1 SV=1	tr|A0A287ASN4|A0A287ASN4_PIG	0	0.373901
Uncharacterized protein OS=Sus scrofa OX=9823 GN=SLC25A10 PE=3 SV=1	tr|A0A287ASR0|A0A287ASR0_PIG	#DIV/0!	0.373901
Sterol-4-alpha-carboxylate 3-dehydrogenase, decarboxylating OS=Sus scrofa OX=9823 GN=NSDHL PE=1 SV=1	tr|A0A287ASS9|A0A287ASS9_PIG	#DIV/0!	0.373901
Uncharacterized protein OS=Sus scrofa OX=9823 GN=GPSM1 PE=4 SV=1	tr|A0A287ATL6|A0A287ATL6_PIG	#DIV/0!	0.373901
Ubiquitin-like modifier-activating enzyme 5 OS=Sus scrofa OX=9823 GN=UBA5 PE=1 SV=1	tr|A0A287ATP9|A0A287ATP9_PIG (+1)	0	0.373901
Protein phosphatase 1 regulatory subunit OS=Sus scrofa OX=9823 GN=PPP1R12A PE=1 SV=1	tr|A0A287ATW2|A0A287ATW2_PIG (+1)	0	0.373901
Uncharacterized protein OS=Sus scrofa OX=9823 GN=AKAP12 PE=1 SV=1	tr|A0A287AUQ9|A0A287AUQ9_PIG	0	0.373901
Uncharacterized protein OS=Sus scrofa OX=9823 GN=TH PE=4 SV=1	tr|A0A287AVR4|A0A287AVR4_PIG	0	0.373901
Uncharacterized protein OS=Sus scrofa OX=9823 GN=ABHD16A PE=1 SV=1	tr|A0A287AWB5|A0A287AWB5_PIG	#DIV/0!	0.373901
Uncharacterized protein OS=Sus scrofa OX=9823 GN=FAM177A1 PE=1 SV=1	tr|A0A287AWY8|A0A287AWY8_PIG	0	0.373901
Transcription elongation factor spt6 OS=Sus scrofa OX=9823 GN=SUPT6H PE=1 SV=1	tr|A0A287AYH6|A0A287AYH6_PIG (+1)	0	0.373901
Uncharacterized protein OS=Sus scrofa OX=9823 GN=SCRIB PE=4 SV=1	tr|A0A287AZ68|A0A287AZ68_PIG	0	0.373901
Uncharacterized protein OS=Sus scrofa OX=9823 GN=VPS13C PE=4 SV=1	tr|A0A287AZG6|A0A287AZG6_PIG	#DIV/0!	0.373901
Stathmin OS=Sus scrofa OX=9823 GN=STMN3 PE=3 SV=1	tr|A0A287AZJ5|A0A287AZJ5_PIG	0	0.373901
Uncharacterized protein OS=Sus scrofa OX=9823 GN=PML PE=1 SV=1	tr|A0A287AZS0|A0A287AZS0_PIG (+1)	0	0.373901
Uncharacterized protein OS=Sus scrofa OX=9823 GN=CAMK1 PE=1 SV=1	tr|A0A287AZS7|A0A287AZS7_PIG (+1)	0	0.373901
Uncharacterized protein OS=Sus scrofa OX=9823 GN=WASHC3 PE=1 SV=1	tr|A0A287AZW1|A0A287AZW1_PIG	0	0.373901
Uncharacterized protein OS=Sus scrofa OX=9823 GN=ZNRF2 PE=4 SV=1	tr|A0A287B011|A0A287B011_PIG	0	0.373901
NHL repeat containing 3 OS=Sus scrofa OX=9823 GN=NHLRC3 PE=4 SV=1	tr|A0A287B092|A0A287B092_PIG	0	0.373901
CD97 antigen isoform 3 preproprotein OS=Sus scrofa OX=9823 GN=ADGRE5 PE=1 SV=1	tr|A0A287B0F5|A0A287B0F5_PIG (+3)	0	0.373901
Uncharacterized protein OS=Sus scrofa OX=9823 PE=1 SV=1	tr|A0A287B0N7|A0A287B0N7_PIG	0	0.373901
Indolethylamine N-methyltransferase isoform 1 OS=Sus scrofa OX=9823 GN=INMT PE=1 SV=1	tr|A0A287B0Z8|A0A287B0Z8_PIG	0	0.373901
Uncharacterized protein OS=Sus scrofa OX=9823 PE=1 SV=1	tr|A0A287B1C1|A0A287B1C1_PIG	0	0.373901
Uncharacterized protein OS=Sus scrofa OX=9823 GN=STT3B PE=1 SV=1	tr|A0A287B1D4|A0A287B1D4_PIG (+1)	#DIV/0!	0.373901
Uncharacterized protein OS=Sus scrofa OX=9823 GN=KIF1B PE=3 SV=1	tr|A0A287B1F8|A0A287B1F8_PIG	#DIV/0!	0.373901
Cation-transporting ATPase OS=Sus scrofa OX=9823 GN=ATP13A1 PE=1 SV=1	tr|A0A287B1K5|A0A287B1K5_PIG (+1)	0	0.373901
Syndecan OS=Sus scrofa OX=9823 GN=SDC3 PE=3 SV=1	tr|A0A287B286|A0A287B286_PIG (+1)	0	0.373901
Uncharacterized protein OS=Sus scrofa OX=9823 GN=GCN1 PE=1 SV=1	tr|A0A287B2G4|A0A287B2G4_PIG	#DIV/0!	0.373901
Regulating synaptic membrane exocytosis protein 3 OS=Sus scrofa OX=9823 GN=RIMS3 PE=4 SV=1	tr|A0A287B2J6|A0A287B2J6_PIG	#DIV/0!	0.373901
60S ribosomal protein L17 isoform a OS=Sus scrofa OX=9823 GN=RPL17-C18orf32 PE=1 SV=1	tr|A0A287B386|A0A287B386_PIG (+1)	#DIV/0!	0.373901
Uncharacterized protein OS=Sus scrofa OX=9823 GN=CNTNAP2 PE=4 SV=1	tr|A0A287B447|A0A287B447_PIG	#DIV/0!	0.373901
Uncharacterized protein OS=Sus scrofa OX=9823 GN=LOC100623720 PE=1 SV=1	tr|A0A287B5M9|A0A287B5M9_PIG	0	0.373901
Uncharacterized protein OS=Sus scrofa OX=9823 GN=KYAT1 PE=1 SV=1	tr|A0A287B5W3|A0A287B5W3_PIG (+1)	0	0.373901
Uncharacterized protein OS=Sus scrofa OX=9823 GN=TOR1AIP1 PE=1 SV=1	tr|A0A287B642|A0A287B642_PIG	0	0.373901
Ubiquinone biosynthesis O-methyltransferase, mitochondrial OS=Sus scrofa OX=9823 GN=COQ3 PE=1 SV=1	tr|A0A287B6T3|A0A287B6T3_PIG (+1)	0	0.373901
Uncharacterized protein OS=Sus scrofa OX=9823 GN=VCPKMT PE=4 SV=1	tr|A0A287B739|A0A287B739_PIG	#DIV/0!	0.373901
Ro60, Y RNA binding protein OS=Sus scrofa OX=9823 GN=RO60 PE=1 SV=1	tr|A0A287B742|A0A287B742_PIG	#DIV/0!	0.373901
Uncharacterized protein OS=Sus scrofa OX=9823 GN=MCCC2 PE=1 SV=1	tr|A0A287B773|A0A287B773_PIG	#DIV/0!	0.373901
Uncharacterized protein OS=Sus scrofa OX=9823 GN=TRA2B PE=1 SV=1	tr|A0A287B7C6|A0A287B7C6_PIG (+1)	#DIV/0!	0.373901
Uncharacterized protein OS=Sus scrofa OX=9823 GN=SEC61A2 PE=3 SV=1	tr|A0A287B8U8|A0A287B8U8_PIG (+2)	#DIV/0!	0.373901
Long-chain fatty acid transport protein 1 OS=Sus scrofa OX=9823 GN=SLC27A1 PE=1 SV=1	tr|A0A287BA72|A0A287BA72_PIG (+1)	#DIV/0!	0.373901
Uncharacterized protein OS=Sus scrofa OX=9823 GN=CAPG PE=1 SV=1	tr|A0A287BAC5|A0A287BAC5_PIG (+1)	0	0.373901
Uncharacterized protein OS=Sus scrofa OX=9823 GN=TXLNA PE=4 SV=1	tr|A0A287BAM9|A0A287BAM9_PIG	0	0.373901
Uncharacterized protein OS=Sus scrofa OX=9823 GN=FEZ1 PE=4 SV=1	tr|A0A287BAQ4|A0A287BAQ4_PIG	0	0.373901
Uncharacterized protein OS=Sus scrofa OX=9823 GN=ACTN4 PE=1 SV=1	tr|A0A287BAZ5|A0A287BAZ5_PIG	#DIV/0!	0.373901
NAD kinase 2, mitochondrial OS=Sus scrofa OX=9823 GN=NADK2 PE=1 SV=1	tr|A0A287BBX3|A0A287BBX3_PIG (+1)	0	0.373901
Uncharacterized protein OS=Sus scrofa OX=9823 GN=ESYT2 PE=1 SV=1	tr|A0A287BCJ5|A0A287BCJ5_PIG (+2)	#DIV/0!	0.373901
1-phosphatidylinositol 4,5-bisphosphate phosphodiesterase gamma OS=Sus scrofa OX=9823 GN=PLCG1 PE=1 SV=1	tr|A0A287BD27|A0A287BD27_PIG	#DIV/0!	0.373901
Maestro heat-like repeat-containing protein family member 1 isoform 3 OS=Sus scrofa OX=9823 GN=MROH1 PE=4 SV=1	tr|A0A287BD47|A0A287BD47_PIG (+4)	#DIV/0!	0.373901
Uncharacterized protein OS=Sus scrofa OX=9823 GN=BCLAF1 PE=1 SV=1	tr|A0A287BE21|A0A287BE21_PIG (+1)	0	0.373901
Uncharacterized protein OS=Sus scrofa OX=9823 GN=VPS33B PE=3 SV=1	tr|A0A287BEJ4|A0A287BEJ4_PIG	#DIV/0!	0.373901
Alpha-tocopherol transfer protein-like isoform X1 OS=Sus scrofa OX=9823 GN=TTPAL PE=1 SV=1	tr|A0A287BFH9|A0A287BFH9_PIG	#DIV/0!	0.373901
Uncharacterized protein OS=Sus scrofa OX=9823 GN=MFN2 PE=1 SV=1	tr|A0A287BGQ1|A0A287BGQ1_PIG (+1)	#DIV/0!	0.373901
Uncharacterized protein OS=Sus scrofa OX=9823 GN=COL14A1 PE=1 SV=1	tr|A0A287BGV6|A0A287BGV6_PIG (+2)	0	0.373901
Uncharacterized protein OS=Sus scrofa OX=9823 GN=EMILIN1 PE=1 SV=1	tr|A0A287BH14|A0A287BH14_PIG (+1)	0	0.373901
Uncharacterized protein OS=Sus scrofa OX=9823 GN=LRRFIP2 PE=4 SV=1	tr|A0A287BH37|A0A287BH37_PIG	0	0.373901
Uncharacterized protein OS=Sus scrofa OX=9823 GN=RPS25 PE=1 SV=1	tr|A0A287BH92|A0A287BH92_PIG (+1)	#DIV/0!	0.373901
40S ribosomal protein S14 OS=Sus scrofa OX=9823 GN=RPS14 PE=3 SV=1	tr|A0A287BHE7|A0A287BHE7_PIG	#DIV/0!	0.373901
Apoptosis inhibitor 5 isoform a OS=Sus scrofa OX=9823 GN=API5 PE=1 SV=1	tr|A0A287BHM4|A0A287BHM4_PIG	0	0.373901
Uncharacterized protein OS=Sus scrofa OX=9823 GN=TCEA1 PE=1 SV=1	tr|A0A287BHY1|A0A287BHY1_PIG	0	0.373901
Uncharacterized protein OS=Sus scrofa OX=9823 GN=CDH8 PE=4 SV=1	tr|A0A287BIY4|A0A287BIY4_PIG	0	0.373901
Uncharacterized protein OS=Sus scrofa OX=9823 GN=ANKRD63 PE=4 SV=1	tr|A0A287BJ08|A0A287BJ08_PIG	0	0.373901
Serine hydroxymethyltransferase OS=Sus scrofa OX=9823 GN=SHMT2 PE=1 SV=1	tr|A0A287BKR2|A0A287BKR2_PIG	#DIV/0!	0.373901
5'-nucleotidase OS=Sus scrofa OX=9823 GN=NT5C3B PE=3 SV=1	tr|A0A287BKZ0|A0A287BKZ0_PIG	0	0.373901
Long-chain fatty acid transport protein 4 OS=Sus scrofa OX=9823 GN=SLC27A4 PE=1 SV=1	tr|A0A287BMB3|A0A287BMB3_PIG (+1)	#DIV/0!	0.373901
Uncharacterized protein OS=Sus scrofa OX=9823 GN=GMDS PE=1 SV=1	tr|A0A287BMI3|A0A287BMI3_PIG (+1)	#DIV/0!	0.373901
Uncharacterized protein OS=Sus scrofa OX=9823 GN=B3GLCT PE=1 SV=1	tr|A0A287BMM2|A0A287BMM2_PIG (+1)	#DIV/0!	0.373901
Repulsive guidance molecule A isoform 1 OS=Sus scrofa OX=9823 GN=RGMA PE=4 SV=1	tr|A0A287BPV6|A0A287BPV6_PIG (+1)	#DIV/0!	0.373901
Uncharacterized protein OS=Sus scrofa OX=9823 GN=PDAP1 PE=1 SV=1	tr|A0A287BQ14|A0A287BQ14_PIG	#DIV/0!	0.373901
Uncharacterized protein OS=Sus scrofa OX=9823 GN=LOC110258309 PE=4 SV=1	tr|A0A287BRF1|A0A287BRF1_PIG	#DIV/0!	0.373901
Consortin isoform X1 OS=Sus scrofa OX=9823 GN=CNST PE=1 SV=1	tr|A0A287BRF4|A0A287BRF4_PIG	0	0.373901
Sulfite oxidase, mitochondrial isoform X1 OS=Sus scrofa OX=9823 GN=SUOX PE=1 SV=1	tr|A0A287BS08|A0A287BS08_PIG	#DIV/0!	0.373901
Alkaline phosphatase OS=Sus scrofa OX=9823 GN=ALPL PE=1 SV=1	tr|A0A287BSC3|A0A287BSC3_PIG	#DIV/0!	0.373901
Developmentally-regulated GTP-binding protein 2 OS=Sus scrofa OX=9823 GN=DRG2 PE=4 SV=1	tr|A0A287BSQ1|A0A287BSQ1_PIG	#DIV/0!	0.373901
DNA-(apurinic or apyrimidinic site) lyase OS=Sus scrofa OX=9823 GN=APEX1 PE=1 SV=1	tr|A0A287BTC2|A0A287BTC2_PIG	#DIV/0!	0.373901
Proteasome subunit beta OS=Sus scrofa OX=9823 GN=PSMB8 PE=1 SV=1	tr|A5D9J4|A5D9J4_PIG (+1)	0	0.373901
Phosphatase and actin regulator OS=Sus scrofa OX=9823 GN=PHACTR3 PE=3 SV=1	tr|A5GFP0|A5GFP0_PIG	0	0.373901
Syntaxin 16 OS=Sus scrofa OX=9823 GN=STX16 PE=1 SV=1	tr|A5GFT0|A5GFT0_PIG	0	0.373901
Tubulin beta chain OS=Sus scrofa OX=9823 GN=TUBB1 PE=1 SV=1	tr|A5GFX6|A5GFX6_PIG	0	0.373901
Actin-related protein 2/3 complex subunit OS=Sus scrofa OX=9823 GN=ARPC1B PE=1 SV=1	tr|B5APU6|B5APU6_PIG	#DIV/0!	0.373901
ADP-ribosylation factor 5 OS=Sus scrofa OX=9823 GN=ARF5 PE=1 SV=1	tr|B9V4F0|B9V4F0_PIG	#DIV/0!	0.373901
Methylsterol monooxygenase 1 OS=Sus scrofa OX=9823 GN=SC4MOL PE=2 SV=1	tr|D0G7F0|D0G7F0_PIG	#DIV/0!	0.373901
EPH receptor B3 OS=Sus scrofa OX=9823 GN=EPHB3 PE=2 SV=1	tr|D3K5K6|D3K5K6_PIG (+1)	#DIV/0!	0.373901
Cysteine protease OS=Sus scrofa OX=9823 GN=ATG4B PE=2 SV=1	tr|D7RA22|D7RA22_PIG	0	0.373901
[truncated: 1,330 more rows]
